# Supplementary material for: MAnorm2 for quantitatively comparing groups of ChIP-seq samples
Source: HighWire-hosted journal article supplement (doi:10.1101/gr.262675.120), 2020-11-18
Supplement: Supplemental_Code.zip [file extend_alignment_section.pdf › MAnorm2_utils-1.0.0/docs/images/extend_alignment_section.pdf]

|                    |                               |
|--------------------|-------------------------------|
| Coordinate         | 0123456789012345678901234567  |
| Reference sequence | CTGGGAGAACTTTGTACGTCGAAAACCTC |
| Read1 CIGAR=1S8M   | NACTTTGTA                     |
| Read2 CIGAR=3S6M   | NNNTTTGTA                     |
