# Supplementary material for: MAnorm2 for quantitatively comparing groups of ChIP-seq samples
Source: HighWire-hosted journal article supplement (doi:10.1101/gr.262675.120), 2020-11-18
Supplement: Supplemental_Code.zip [file GM12891_cmp_GM12892.H3K4me3_hieMA.xls]

GM12891_H3K4me3_1.norm_signal	GM12891_H3K4me3_2.norm_signal	GM12891_H3K4me3_3.norm_signal	GM12892_H3K4me3_1.norm_signal	GM12892_H3K4me3_2.norm_signal	GM12892_H3K4me3_3.norm_signal
6.4178525148859	6.17732640868095	6.4604635668925	3.5085438943729	2.42911544773853	3.86169772066807
9.56510207836031	9.58004421368524	9.48110218102636	9.60995957315887	9.53665370437993	9.42912960573167
8.14720492494223	7.85875393071124	7.80045011702564	8.39171134023506	7.64909870631509	7.8373821899121
4.93073733756289	5.34991348350369	4.60192609813369	5.0774233017496	4.63324601438911	4.66770745902438
4.61470984411521	4.99462895069659	5.34792042793151	4.31130840363534	3.12869283613752	4.50367859178255
5.02236781302845	5.88949310290092	5.24629328549821	5.1712314564881	6.05413939557822	5.42104232055518
4.4262647547021	5.03451298267111	4.43243576229115	3.91245686687681	5.3328234027881	4.99160250306151
5.84549005094437	6.29371430666266	6.27603805607014	5.56128723506343	6.30921053263191	5.35760287208639
9.7099453802325	9.77746641774065	9.56572308017452	9.81838792832401	9.79128137634823	9.65836378417083
9.00140819439281	9.25008184745805	8.71063998104333	9.35303271669905	9.45452877622346	9.05028465721118
6.96000193206808	7.69337184021963	7.38913516845317	7.42630370664857	7.82564667759587	7.16044535368381
3.95419631038688	4.8226151437651	4.49105231098207	5.12515042661382	5.89418241046373	4.94946421443198
6.98299357469431	7.65179036949039	7.37186764800541	7.26629941150682	8.08369180633515	7.71808289526525
5.62935662007961	5.95200412229863	5.82273080578509	5.49185772577297	6.09660801779427	5.59646548109213
3.08746284125034	3.19445149801781	2.7583238043547	3.5085438943729	3.30010417612872	3.56576066593543
9.88340698638837	10.0566151624645	9.85704007919985	9.87452827019152	10.1702181542413	9.79404843203336
6.40087943628218	6.5008857996807	5.91581881934643	5.75024395329723	6.56930373252129	6.12384582274151
9.57459352733761	9.28044815505875	9.25144892491072	9.41307577512775	9.39565590177713	9.18927561286427
6.15987133677839	6.15987810458764	5.64474713235534	6.57741493905821	6.76231651912023	6.06484836488198
7.31741261376487	7.77299361041742	7.24518468810899	7.38374541386583	8.00814857706781	7.53741853945662
5.89481776330794	6.90416367821162	6.37938900227762	6.86127500833862	7.52963040481292	6.84206617375814
7.7176764230664	8.10150045393508	7.95015001400658	8.10720125435074	8.4014827645238	8.07630116845256
4.04439411935845	5.11101684867829	4.02364373213252	4.68489457224183	5.56721150809851	4.10805902261312
7.13442632022093	7.47184644201005	7.19726116710566	7.14788537748583	7.72119447417378	7.05152245904692
8.03066713624694	8.16554132507557	7.97373025046087	7.98060084190359	8.30907652996518	7.94774885172606
9.48482289426215	9.25008184745805	9.12218760394902	9.39015225470961	9.55183308378487	9.2759122216902
6.25738784269265	6.79714990218726	6.63906881088638	5.65910290012106	6.64139950037998	6.12384582274151
8.72962074355304	9.35537411439033	9.14133847829827	8.90263999175986	9.30432184289309	8.8641107192052
3.64385618977472	3.4611352150646	2.7583238043547	4.22219422599246	5.50423474277931	3.67114404185098
6.31288295528436	6.96464300743378	6.58182856501109	6.98338891573284	7.14175453806655	6.70564849953041
3.85798099512757	5.38093356346908	3.76907963919325	5.99141566847939	6.27293017728827	4.61503258219888
7.33539035469393	8.2307605990676	7.50482101427022	7.95264548254784	8.63324918284762	7.44593248148682
5.37503943134692	5.97223413077223	5.47366946056314	5.86283409386407	6.39591690957464	5.42104232055518
6.66533591718518	7.05995962916173	6.76050100671076	6.44451369223554	7.0717646863501	6.18057357677894
5.22881869049588	5.03451298267111	5.41209169373501	6.0860546750644	6.03240079118709	5.56863937693951
10.5308939811939	10.620247431466	10.4390752032443	10.5536114532567	10.7680826287599	10.4620630317253
4.78135971352466	4.91127008674041	5.24629328549821	5.96667019389722	5.62741915164244	5.45176717702648
4.61470984411521	5.80153669423368	5.24629328549821	6.95984262470429	7.36602947741612	6.86556850012359
10.3744961456915	10.4733001813795	10.3641755180379	10.4764047497065	10.6611927996376	10.2998285066845
5.5077946401987	6.26143896928177	6.16516426891851	6.29691912849157	6.69646232676589	6.04464613434075
9.21310421964191	9.36247315652978	9.19213792809546	9.31076930479505	9.37672673627002	9.12519998082298
10.0761475280225	10.1042415237416	9.9684505408056	10.1065901761862	10.0899594433343	9.83819145343775
9.89708912831276	10.0619879410455	9.8519322228848	9.87184375409199	9.94308633331073	9.68617349011849
6.77478705960117	7.15779780362808	6.44459006529813	6.51261594297227	6.86150942261649	6.27052461024978
9.53624721568813	9.91390759548099	9.62426197194303	9.66597689003962	10.0274088851238	9.60111988153255
4.78135971352466	5.14775176222301	4.24170686140998	4.47347289718894	5.09404585999761	4.38322475132988
10.3077700318907	10.4112342057231	10.298181834765	10.5640569825219	10.5023578362327	10.2918569209649
10.8372337003391	10.9395361643002	10.9761391844484	10.9589265612153	11.0229958907158	10.9786245309255
8.97584796800678	9.11733127339961	8.83191869137176	8.78068541156111	8.91401950411171	8.79643612451182
10.8213753923725	10.8270222047003	10.7880177894687	10.854278039221	10.9548736442059	10.7973348959465
8.20701432017753	8.35271281140168	8.27526049487923	8.32925990726994	8.22773836890636	8.3976654007945
6.21916852046216	6.54154438735351	6.70772196925571	6.25732460377796	6.36189023198712	6.12384582274151
5.3037807481771	6.08781843278933	5.38034382929138	6.19564207854942	6.66920762982884	6.23519981315784
1.8073549220576	3.03919762325003	0.115065214379401	7.26629941150682	7.69541482690774	6.97777010304536
10.0667619323869	9.8303652546553	9.88733280809609	10.0560525091067	9.94434622605956	9.93293208187394
8.3151495622563	8.46822460946323	8.20654098248177	8.28153278240571	8.43221624662058	8.26840843157695
7.25266543245025	7.31214719357434	7.29164689620114	7.67758237784506	7.57299561058939	7.60954732857789
10.2390017577656	10.1929284820876	10.0678335504778	10.3235535409433	10.2897809050627	10.1865581264277
8.17741953798924	8.04806441112136	7.75386615495354	8.45137381466416	8.30907652996518	8.13167332955501
5.68650052718322	5.82405082993398	5.6175349382647	4.97652879330422	5.29580754618006	4.94946421443198
4.78135971352466	4.04718658977498	4.37147393822559	4.31130840363534	5.09404585999761	4.38322475132988
10.6532929453828	10.8841150175028	10.6640833154837	10.7643640306891	10.8088750211447	10.725078124549
7.9915218460757	8.52742130286109	8.29907101640527	8.22283812128823	8.50616151103632	8.1802688223972
6.53138146051631	7.2000994091049	6.5671761216006	6.10870297046836	7.17068878306963	6.19900806390525
10.8513586490335	10.791865237411	10.8697519671456	10.8124053762442	10.8697955426403	10.7377914771397
7.45532722030456	7.85875393071124	7.48882252218714	6.76862878188125	6.83737658103969	6.40392530783205
4.93073733756289	6.22839964808162	4.97893715627328	6.0395728601124	6.1377991926407	5.67692578483052
9.39124358942744	9.27668829783067	9.09720602194354	9.51689417410325	9.35172106520217	9.2872390036944
7.87958324961278	8.01592179658473	8.37735203462633	7.49169742519187	7.70836530942989	7.62355921324781
7.96289600533726	7.04140990564638	7.38913516845317	8.16627020606985	7.7275642685473	7.75680914063995
6.07681559705083	6.59397669814351	5.34792042793151	6.56150740071845	6.47745904599472	5.56863937693951
9.19844504145236	9.22881508196734	9.02558370563503	9.41685841725498	9.19126581021479	8.91144845689249
7.63299519714296	7.05995962916173	7.27323165850794	7.86508900847121	7.52226746599461	7.47706270897972
6.85174904141606	7.24115666758426	6.89687053048382	7.08449558953895	7.18019926102211	6.46635747769103
8.23122118071119	8.24660015799405	8.35929146915502	8.13213140732777	8.13183396264232	8.19454060894776
10.5112584955023	10.4915519829255	10.3209167469217	10.4276672230545	10.4795463343222	10.3686140962771
8.12670447284319	8.07948349665342	8.48562500406163	8.5632564939628	9.01197493441147	8.66826006109433
5.02236781302845	5.75538881686638	5.44319159712969	3.91245686687681	4.80465735438032	3.76949646396102
7.33539035469393	7.13178749540005	7.35440221470533	7.42630370664857	7.67575654695937	7.67157823847989
6.31288295528436	6.21158202112632	6.92040524343466	5.75024395329723	5.4039824378323	5.77780200635968
5.3037807481771	5.47006039493839	5.74898210607065	4.80928361895612	4.85733705373553	5.11124157014134
6.94836723158468	7.12300855984602	7.30077172810054	7.27570943236199	7.44637529023258	7.33149083798275
7.56605403817109	7.18333228675023	7.55183273358011	5.75024395329723	5.4039824378323	6.00339198228885
4.28540221886225	3.4611352150646	3.46328913025229	3.15008487720176	3.45242805283596	3.19513728444974
7.06069593168755	7.21666751046927	7.09664096900892	7.0736319732844	6.95400048240409	6.75672684381965
10.9095181142966	10.7810149840652	10.6255671245956	10.9696044932453	10.9256629569836	10.8869549702245
8.90538700501813	8.88357386548478	8.73212812616217	8.83139617675628	8.89789170255774	8.71888539020133
9.41679752760606	9.59660784674047	9.2889223470445	9.13860779521535	9.33413804208793	9.04231307149158
7.24317398347295	7.77851079606649	7.5974374051421	7.34869507798719	7.84328001117723	7.33996637721545
6.36632221424582	6.24501706043451	5.58982794999034	6.39105786646756	6.50876334201068	6.28787468998334
6.70735913208088	6.91442729910107	6.5671761216006	5.3411384194437	5.74043196766772	5.56863937693951
6.98299357469431	7.53880633738145	7.26393990792679	3.15008487720176	2.42911544773853	1.94559343497647
9.38909352190447	9.17114371926968	9.22594469151656	9.08643296197751	9.11497563239035	8.8641107192052
7.70390357344466	7.7618933837136	7.79388182076192	7.38374541386583	7.32401687857265	6.96692637942936
7.17492568250068	7.48549785793062	7.49684276372154	7.00652745822151	7.41480032801259	7.08203540478505
8.35974956032233	8.61175980622621	8.50638612047744	8.62273148501798	8.83990003516973	8.45034027762
9.10983065427879	9.56021218611515	9.17361878243071	9.08884926903578	9.57181403378634	9.08950877168703
6.59245703726808	6.98423415221805	6.61071743729548	6.29691912849157	6.80036072443166	6.35530310933329
5.18982455888002	5.70766293195228	5.06022802214812	4.68489457224183	5.21863201240317	3.94847214598054
6.63662462054365	7.32744429080199	7.22619575237561	5.3411384194437	5.00421016375909	4.71856559429913
4.04439411935845	4.72794523364979	5.02012459256767	2.92686429600143	2.42911544773853	1.57497005349077
7.01680828768655	7.31214719357434	7.16776652296875	6.87400098490191	7.34097688877897	6.6661441794192
8.71938882094208	9.14035174669573	9.22079221873316	8.5950726979837	9.09404902845612	8.81520294956449
8.48179943166575	8.62683388525051	8.33179281545032	7.68450579975436	7.94997559797186	7.2166327120511
2.4594316186373	0.617961414902942	0.115065214379401	4.97652879330422	4.63324601438911	5.59646548109213
10.3712321283696	10.4764916000935	10.2437762435289	10.5308321568188	10.5549584886896	10.3379462897001
8.01402047031493	8.16554132507557	8.0755460806574	8.32070808646938	8.38191809862414	8.33014048363951
10.0986900966736	10.2763156488759	10.1202094225302	10.0454755348374	10.1046006544768	9.91976467504766
7.82336724004623	8.2187618476599	8.17098304708933	7.76490402742289	7.70190537612481	7.51507357004614
7.40514146313634	7.98776932327401	7.69882297459235	7.11656634753293	7.29817642664819	6.69259761995601
3.52356195605701	3.19445149801781	2.0949676812568	3.3412987200248	3.58949268174602	3.45226315803808
10.0299773465896	9.93638356997886	9.84338089643798	10.1333712133846	10.0944811257627	9.95461982225351
5.65821148275179	6.27766992137209	5.50354968015174	5.94145779612026	6.23566248115739	6.06484836488198
9.7099453802325	9.96081150107203	9.85704007919985	9.68000964089035	9.93803513967704	9.66885397493968
8.67065624911844	9.0189915935626	9.06895975678706	8.95168099818432	9.10571437429745	8.81830766601081
4.12928301694497	5.2184426217989	5.06022802214812	6.33537408280267	6.69646232676589	6.19900806390525
6.49984588708321	6.76337778339134	6.36264331316902	6.33537408280267	6.97617915856038	5.96095049880477
10.3657756353263	10.5704819833486	10.4133359869039	10.2727740971452	10.5057052337352	10.290714597308
3.39231742277876	4.12475355267435	2.0949676812568	4.68489457224183	4.85733705373553	4.10805902261312
4.35755200461808	5.18354465032151	5.28092755757435	6.94791203259644	7.14175453806655	6.75672684381965
8.30606168942834	8.41690095476766	8.5630561122971	9.63104111081399	9.71602295786234	9.43117785573775
5.96578428466209	5.7317298411167	6.203025654386	6.49591300749508	6.70988893746113	6.08477758394146
10.4351493383669	10.4740987203898	10.4529336606304	10.4223383328847	10.5031954529691	10.305496229907
9.16113188298431	9.51809966683939	9.41894121539636	9.24797541253887	9.52473009267924	9.22736624730926
3.64385618977472	4.33452438750865	3.67380846999506	4.68489457224183	5.09404585999761	4.44468113392301
9.54399845013454	9.70320176873279	9.53663727114503	9.41874573033583	9.83425514808308	9.52437118026909
9.26795708440284	9.56787327094467	9.44811729201575	9.39783720724614	9.49882446549364	9.39386691863668
8.92925840863697	9.49253107736902	9.27404337734047	9.66126636539946	9.80946708093484	9.50113120201821
8.81217730551445	9.16299871496577	9.11667142643632	9.38435939546726	9.46171307241793	9.32291094132046
7.95128471496697	7.91479907809042	8.52686818117006	8.35876748511988	8.40923103594966	8.57981990998428
6.25738784269265	6.58105210439633	6.89687053048382	7.11656634753293	7.3906319951221	7.20741555850155
5.4093909361377	4.72794523364979	4.49105231098207	6.33537408280267	5.56721150809851	6.25296797709771
5.14974711950468	6.15987810458764	6.25811029194919	6.01571120032168	6.56930373252129	6.06484836488198
8.11113567023471	8.18625158855474	8.85833482197988	8.66979809704666	8.60004747622523	8.82449755869653
7.04984854945056	7.33503042986567	7.96198574243047	7.73199060382378	7.93367179444863	8.06083172835132
1.32192809488736	3.19445149801781	2.0949676812568	4.97652879330422	4.28907007014501	3.86169772066807
6.73470962022584	7.01311475802897	7.05445578722783	8.60897365496993	8.79692046227065	8.48184459487441
7.18487534290828	7.3500801298528	7.54409747649387	7.72530950270928	7.86644341023871	7.73757313181921
9.04028972102572	9.26913806358985	9.10000206378099	8.30343847692131	8.47706074393885	8.41814822683052
7.85486838326024	8.30821992423156	7.87713761232245	7.87110801612209	8.28390883874498	7.75042497583299
10.2917462808339	10.2103949809246	10.1722275431926	9.97771255376952	9.94308633331073	9.87197145699949
3.75488750216347	3.4611352150646	3.76907963919325	5.59469441107059	4.50575837081054	4.25205035649873
7.21431912080077	7.56471605858401	7.31885909029179	7.68450579975436	7.8137637108835	7.50754937123806
10.1966021265232	10.3471541281192	10.1173464017277	10.1552858897273	10.2348736367675	9.99566609298705
4.97727992349992	4.72794523364979	5.47366946056314	3.15008487720176	2.93271575547781	3.45226315803808
9.44397954260125	9.62476281070779	9.34226833897534	9.5852140985767	9.54342087477133	9.29399354878778
9.63571812033105	9.67660008409686	9.49409878325259	9.86375769347593	9.85322927296567	9.59746727343049
5.02236781302845	5.34991348350369	5.17456981801981	4.22219422599246	4.50575837081054	4.31909552746624
6.31288295528436	5.99217512922317	6.1263381590892	4.31130840363534	2.93271575547781	4.10805902261312
10.1401907031918	10.198774966664	9.98416849732275	10.0815602543222	10.1388953406635	9.99426955901213
9.31174831500496	9.46812755104723	9.24638211268189	9.11040163045245	9.28203653379145	9.11255204937563
6.77478705960117	6.97447295053747	6.25811029194919	5.86283409386407	5.94182211198099	5.67692578483052
10.0175044011094	10.1289930460495	10.0028185092961	10.0360029745532	10.0740149418186	10.0625251358166
7.97441458980553	8.12317551915021	8.20151179516479	8.09201680186843	8.271149398734	8.21802422247879
2.70043971814109	2.15145515053493	2.34953177419607	3.5085438943729	2.70393463167972	1.57497005349077
7.56605403817109	7.44413642726614	7.83287351838552	7.51541788429146	7.17068878306963	7.87313520805668
10.9399464524587	10.8769552865569	10.922184880638	10.8023987086162	10.6693756249247	10.8922844434337
10.1440208692669	10.3636680672391	9.97318297434172	9.86105142938305	10.0309598896752	9.81470783990672
7.08214904135387	7.54532899482042	7.52065328524758	5.65910290012106	6.23566248115739	5.82576525052785
10.1978309980122	10.3697032360379	10.2673311674285	10.371549608679	10.3034127605933	10.2606992880648
6.31288295528436	6.89382402980806	6.49172296812844	7.05163612781484	7.47723864308219	6.45099546620676
3.95419631038688	4.3979828674226	3.08032555527072	4.47347289718894	5.04986450203883	3.94847214598054
8.10590850857116	8.50796668616945	8.10802707678536	8.39171134023506	8.85950471197622	8.23193696497944
7.73131903102506	7.69921220920855	7.82644379418854	7.40093172717506	7.75275124644143	7.9533349938875
10.0613711926598	9.99610802342685	9.92029985640211	10.0454755348374	10.1190869922969	9.97599323647058
7.87344411251538	7.80036401975067	7.83927622685496	7.62086437010447	7.73390457302646	7.66481336529972
5.53915881110803	6.15987810458764	5.72358414524602	6.13097377665755	6.66920762982884	5.9392627584252
4.97727992349992	5.75538881686638	5.58982794999034	4.22219422599246	5.4039824378323	4.90608638820704
5.84549005094437	6.106185094514	5.64474713235534	4.97652879330422	6.03240079118709	4.99160250306151
3.75488750216347	4.67808828549433	3.57218132756176	1.19073971427664	2.42911544773853	1.57497005349077
9.91064273046963	9.99835485876423	9.75511984506426	9.71974001585819	9.91378421420125	9.6228475639458
6.40087943628218	6.63204758944358	6.10654772022759	4.74853600189173	5.13684632212839	5.42104232055518
9.88645869570371	10.0162005180815	9.84851744862921	9.92324306935152	9.99016571023719	9.83352455154523
9.66444728454797	9.82529175101628	9.61432815336179	9.76852328260547	9.87327114266875	9.79084421617791
6.11894107272351	6.34076975633239	5.96031372854794	5.45574154237242	5.29580754618006	5.07243038899704
9.50084187955693	9.68083420105013	9.62624098829116	9.35501229845238	9.57676405118041	9.51859542967241
10.3292357417338	10.6224026240999	10.4180482979615	10.355741702347	10.5662004436369	10.3511678031425
7.48784003382305	7.49227382343086	7.31885909029179	7.40093172717506	7.60811300448288	7.19814043505184
10.525031345124	10.5072314081327	10.4904070827642	10.548762760525	10.6416549723251	10.478252447329
9.20823435833979	9.26534757612283	9.03727191153952	8.82258591996561	8.93786058954736	8.67852511252036
9.41045135150399	9.65523467484917	9.33030719142596	9.66754338194131	9.78280582590473	9.53585525985144
9.96794670581271	10.120791208852	9.92843137182271	9.93354648378851	10.0356802849436	9.86436184379295
6.66533591718518	5.47006039493839	6.81151304612518	5.02792810856376	4.57098514209268	5.38966369491998
6.4178525148859	5.88949310290092	6.34571155704058	5.72054901037392	5.4039824378323	4.90608638820704
10.3690520070014	10.3375033620377	10.2841194311831	10.1531105250806	10.0967363808156	10.2217014930082
9.64655871015455	9.56634441410841	9.29630770418502	9.46325951837795	9.68745928456648	9.4126403799453
5.56985560833095	5.65824728830633	5.34792042793151	5.69017912492378	4.57098514209268	5.48186495162704
6.13955135239879	6.01183525918843	6.00354619900992	4.54772630139037	4.12286597339084	4.66770745902438
7.27146302790437	6.89382402980806	7.39769610318247	6.65423019246572	6.21664129592218	6.58381174471598
4.28540221886225	3.96505430423864	4.49105231098207	5.30064388294993	4.57098514209268	5.25701345331335
5.53915881110803	5.65824728830633	5.34792042793151	3.5085438943729	3.82827022453651	2.2415304897091
1.8073549220576	0.617961414902942	0.115065214379401	3.91245686687681	1.62413965788592	3.04754022806541
5.68650052718322	5.49854803987063	5.58982794999034	5.0774233017496	5.09404585999761	4.44468113392301
6.40087943628218	6.24501706043451	6.41233822916855	3.5085438943729	3.30010417612872	3.19513728444974
3.08746284125034	2.86448913179062	1.40621359733427	2.65872461320796	3.12869283613752	2.88351136082358
5.84549005094437	6.34076975633239	5.67148189482185	6.23707849767554	6.56930373252129	5.9392627584252
6.01122725542325	6.38629051258573	5.82273080578509	6.56150740071845	6.93145670880421	6.14299855645079
5.71424551766612	5.14775176222301	5.34792042793151	4.74853600189173	5.09404585999761	5.03257013096887
10.025831668332	10.1850948808781	10.031888673116	9.95012191265887	10.1712855769932	9.90053509770603
8.65999589242998	8.28925433148772	8.51461201021693	8.24571911597253	8.20998118889746	8.1802688223972
9.93295289219471	9.66809312337111	9.67872544146975	2.92686429600143	2.93271575547781	1.94559343497647
8.02513956227851	7.65780695704682	8.01982351497702	3.91245686687681	2.93271575547781	3.76949646396102
7.24317398347295	7.27315454213027	6.79891923581658	5.52702337209689	5.04986450203883	5.59646548109213
10.004922678569	9.95155596014379	10.1058402224815	9.60011630625908	9.67064597457821	9.5604348249553
10.334831928118	10.3480281708228	10.3787288387514	10.3359525069303	10.1497774266957	10.2228985221058
9.30720080914081	8.92777321474267	9.09440484032041	9.11040163045245	8.74349860844406	9.01270963688303
5.37503943134692	5.2184426217989	5.6175349382647	5.83556340367804	5.56721150809851	5.56863937693951
8.62021982550749	9.06574679265736	8.68150949063255	8.01878108045733	8.37004371797799	8.02409253879102
8.07948478382682	7.49227382343086	8.03113223013505	7.76490402742289	7.19902434535658	7.68501559584094
5.76818432477693	5.75538881686638	5.41209169373501	5.41862200436187	4.95698123108756	5.22189894279918
6.40087943628218	7.25724729131898	6.31127297552255	4.02387282684165	4.74986991575351	4.38322475132988
7.29920801838728	7.10528329115956	7.34559385275829	7.94129749553916	7.68889337019691	7.64433053926369
6.43462822763672	7.14918144199688	6.5671761216006	6.33537408280267	6.72318519065476	6.25296797709771
7.18487534290828	6.95474334783916	7.53632275363946	7.31270051262979	7.13197232989403	7.50754937123806
7.25266543245025	6.75193635743088	7.16776652296875	7.12708779905238	6.64139950037998	7.19814043505184
5.2667865406949	4.3979828674226	4.43243576229115	4.61806977613308	4.74986991575351	5.22189894279918
8.81538329581354	8.56866521233803	8.55108870230245	8.50475336360605	8.61009277789935	8.91726024674845
10.5919897676151	10.625987233548	10.7094420503233	10.7223741674925	10.8188860549148	10.6446098654561
7.40514146313634	7.07826607059422	7.90798567736692	7.24727820149798	6.84949615855455	7.24394348824623
6.8008998999203	6.74040037315908	7.17766163808819	7.00652745822151	6.78779638564993	6.83017304666103
4.12928301694497	3.57752311304631	4.75443751320717	6.65423019246572	6.49320063679559	6.88870214730589
6.91288933622996	6.97447295053747	7.32782289480891	7.17848711431192	7.19902434535658	7.28836671951592
6.70735913208088	5.86801812314063	6.41233822916855	5.83556340367804	5.65655861948655	5.77780200635968
8.66355810421727	8.48492153285774	9.02264759225292	8.71206640646661	8.72521798122225	8.64402670273955
7.95710204156229	7.53880633738145	8.05350096021406	7.60630054812059	7.25399506868941	7.63743921939989
6.81378119121704	6.34076975633239	6.69423655050412	7.01794818961951	6.81281084037119	7.08203540478505
5.14974711950468	4.57269135888201	5.72358414524602	4.02387282684165	3.12869283613752	4.56040634581997
7.7515440590891	7.53225305702538	7.96786931102862	7.31270051262979	7.51486472731373	7.89069184120874
6.09803208296053	5.60701782661654	6.47617342122666	4.31130840363534	5.17834959891815	5.65059044630124
5.4093909361377	4.72794523364979	5.56160784027874	4.61806977613308	3.58949268174602	5.11124157014134
6.40087943628218	6.70520911047886	6.78622047587905	6.47899863684373	6.66920762982884	6.92273611391144
7.55074678538324	7.49227382343086	7.57480566676782	6.82235330208792	7.40679151383522	7.38982148307229
9.04575966138268	8.56866521233803	8.92243859019746	8.12221509139704	8.13655639256788	8.46617656152437
10.2330204264745	10.220004975179	10.2318608210765	9.95896270301303	9.99259930185293	9.9802309973387
7.31741261376487	6.81921907576969	7.35440221470533	6.84842666473945	6.61301499579721	6.92273611391144
5.53915881110803	5.2184426217989	6.04558589616204	2.92686429600143	3.12869283613752	2.69892829650727
7.36194377373524	7.13178749540005	7.55952892354487	7.34869507798719	7.10219934598848	7.84939642961603
6.01122725542325	5.49854803987063	6.0247110166559	5.88955933351121	5.43822180424171	5.87221758745769
5.53915881110803	4.95357169221723	4.93660547935903	3.7908987903721	3.71407883415158	3.04754022806541
8.98441845880114	8.75564053145683	8.94425265722257	7.49965112390853	7.51486472731373	8.05563897732664
10.892163309862	10.823918943858	10.8468432375035	10.7841956668394	10.7667017329319	10.8693069892519
4.04439411935845	4.04718658977498	4.24170686140998	4.22219422599246	4.74986991575351	3.76949646396102
6.53138146051631	6.75193635743088	7.02203238586795	6.59313532554514	7.17068878306963	6.76922471325639
9.55937709052668	9.7535938826772	9.67106311294891	10.0792613850427	10.0910912643255	10.2084696445029
10.7677706487767	10.8721616483553	10.8636180332639	11.0341937020372	11.001633053291	10.9685555541162
9.14593214582051	9.06355551096407	9.49409878325259	9.22419097903257	8.99192695230051	9.31849885196426
7.24317398347295	7.01311475802897	7.27323165850794	6.93587395622935	6.88522435842188	6.45099546620676
6.38370429247405	7.06914286065278	6.87296663054156	6.68376106153824	6.32699654004143	6.16190573552147
8.38154295118458	8.60263659628476	8.58671261389398	7.94698353577504	7.93912799019715	7.64433053926369
10.2413873639989	10.0576913738918	10.3271722662724	10.1949042127129	9.86795525701748	10.1643161331393
7.37068740680722	7.03204177550261	7.57480566676782	7.20840367973258	7.12211974551823	7.36510459555128
7.59618975614441	7.22487839386286	7.84565214567088	7.57668786939968	6.73635359328034	7.4537768604466
5.98868468677217	5.95200412229863	5.89307448108856	6.95984262470429	6.8734182221904	6.92273611391144
8.9957671508778	9.35537411439033	9.14133847829827	9.49391632388453	9.68289426926831	9.39805950075632
5.10852445677817	5.2184426217989	5.50354968015174	6.52911266409833	6.05413939557822	6.08477758394146
7.7176764230664	7.58383753776763	7.69882297459235	7.86508900847121	8.02870435992071	8.05563897732664
3.39231742277876	3.4611352150646	3.76907963919325	4.61806977613308	5.68509097069813	5.35760287208639
7.76487159073609	7.4229868385329	7.50482101427022	7.8345804357235	7.67575654695937	7.31439221435525
10.8317030992143	10.9240074313771	10.6459601003922	10.8256320859656	10.838035641906	10.6993178229791
8.9901039638575	9.09606892546509	8.547078588478	8.85173031279715	9.1401258158849	8.799580560175
4.28540221886225	5.14775176222301	4.09985173013969	3.3412987200248	3.93366862599012	3.19513728444974
5.76818432477693	5.86801812314063	5.56160784027874	4.47347289718894	4.12286597339084	4.31909552746624
9.99929538702341	10.1146080485667	10.0181877003342	9.87452827019152	10.0820103967638	9.84129453668116
6.70735913208088	6.43037352840495	6.97769929920344	5.0774233017496	5.29580754618006	5.25701345331335
8.68123841177781	8.98924292665018	8.62915147344724	9.41685841725498	9.62848005587192	9.06609971244578
7.07146236255662	7.28104069955878	7.39769610318247	7.34869507798719	7.29817642664819	7.14123023145742
4.88264304936184	4.8226151437651	4.97893715627328	6.66907720564851	6.34455451542754	6.27052461024978
7.11374216604919	7.20840804168415	7.66338318254298	7.47564657226481	7.49241335037569	7.55212928255664
8.5018371849023	8.31573459192084	8.43028386408254	8.45137381466416	8.42077186257277	8.3935344743755
5.18982455888002	5.91064269163416	4.97893715627328	5.72054901037392	6.01031154906213	5.67692578483052
10.1286388128526	10.2399731421288	9.9888524427336	10.1077168351392	10.1977042843773	9.95748757185395
3.39231742277876	3.19445149801781	3.67380846999506	2.65872461320796	2.70393463167972	1.57497005349077
2.4594316186373	3.68494888616691	3.57218132756176	3.15008487720176	4.0315319145068	3.19513728444974
-1	0.617961414902942	0.115065214379401	3.6571655276825	3.45242805283596	3.04754022806541
10.0437108633472	10.2065323810141	9.86889224630106	10.1233911197272	10.1670108850438	10.0040176382929
7.36194377373524	7.57111903381145	7.16776652296875	6.98338891573284	7.09212942325533	6.90013429577452
5.74146698640115	5.49854803987063	5.69775569006896	4.47347289718894	4.4372689337294	3.67114404185098
7.96289600533726	8.22277290258077	8.35474268257168	7.81593523870239	7.61502970262664	7.7883218731493
9.28424574982967	9.68505551319468	9.56160180011307	8.97554265797504	9.06324575208141	9.02084241356397
10.2708792953288	10.2219190600206	10.2464115098561	9.69849363507925	9.63322978313485	9.59746727343049
4.93073733756289	5.68317377483728	5.58982794999034	4.22219422599246	4.12286597339084	3.86169772066807
4.61470984411521	4.19823610548472	5.21085349344884	4.02387282684165	4.0315319145068	4.94946421443198
4.55458885167764	4.91127008674041	5.02012459256767	4.61806977613308	4.95698123108756	4.76772813896765
7.31741261376487	7.43712211023457	7.2069672023013	7.11656634753293	6.99800437459596	6.84206617375814
10.9690267021508	11.0383348856907	10.8905971009535	11.0189063018761	11.0212761290984	10.7695165110046
9.87574935142005	9.82656185679268	9.88232565449822	9.86240524655976	9.8177797214573	9.73361320776009
7.76487159073609	7.63358342241635	7.58238698774818	8.22744577219562	8.271149398734	8.08142179778929
6.17990909001493	6.12431322141483	5.89307448108856	6.76862878188125	6.74939658064254	6.49660961065129
5.4093909361377	5.44097921490548	5.56160784027874	5.12515042661382	5.09404585999761	4.99160250306151
9.68562483972635	9.85670275586487	9.83822697143288	9.57686271239674	9.63638714089391	9.53966349893942
8.87190523765919	9.05033508552016	8.90983175615163	8.66649062644929	8.91668910207476	8.65792305778613
5.94251450533924	6.43037352840495	6.62495905846883	4.80928361895612	4.57098514209268	5.14905748229743
0.584962500721156	1.33099539615863	0.115065214379401	6.01571120032168	5.65655861948655	5.70279907596279
8.65999589242998	8.46822460946323	8.87785067942444	8.37534093714422	8.32560165742304	8.47010920323433
6.63662462054365	6.65686328574097	6.47617342122666	2.92686429600143	1.62413965788592	3.32929698347301
8.39016895620018	8.06161642196056	8.17098304708933	7.56163173896098	7.52226746599461	7.84939642961603
10.656871725614	10.6951303171382	10.5648357223559	10.6372500168599	10.7310100504346	10.5461024425295
6.73470962022584	7.18333228675023	6.90868332121957	5.83556340367804	6.32699654004143	5.77780200635968
6.65105169117893	7.22487839386286	7.74029063199344	5.52702337209689	5.4039824378323	5.25701345331335
6.94836723158468	6.59397669814351	6.98890407302384	5.94145779612026	5.59764616773689	5.56863937693951
8.39016895620018	8.54660849366095	8.4346129646472	8.41189627752395	8.28813570420346	8.25937477535222
9.70303838898642	9.56787327094467	9.49194036593156	9.72274782228096	9.57181403378634	9.49330243901564
7.94544383637791	7.59644120039137	7.90798567736692	7.75838588064845	7.68889337019691	7.92519025098955
10.7972562175098	10.7446644599534	10.8423979532138	10.6582991656559	10.7095720443783	10.7628940367051
7.24317398347295	6.86233744320776	7.58993077728287	6.97166763496674	6.89692958627221	7.12176143693097
4.20945336562895	5.25248933778294	4.8482420390064	4.80928361895612	5.7936232483966	5.35760287208639
3.24792751344359	3.78469460606435	2.0949676812568	6.10870297046836	5.74043196766772	5.07243038899704
9.97226184873329	10.0173083325459	9.79812354185243	9.93994600482872	9.94811896486808	9.8704526723469
7.1548181090521	6.88340721913568	6.32858955248043	6.39105786646756	6.23566248115739	6.27052461024978
9.89254281664855	9.96196414040421	9.47674523059894	9.91416194500681	9.94434622605956	9.58461142816927
7.34429590791582	7.81116365700408	7.11730355506614	7.43465509282854	7.71479491429791	7.2348959766337
4.49185309632967	4.72794523364979	4.09985173013969	5.0774233017496	5.3688650439388	5.07243038899704
5.91886323727459	5.2857253401377	5.79854232372537	4.80928361895612	4.80465735438032	5.11124157014134
4.49185309632967	3.96505430423864	4.43243576229115	4.12670951213927	3.12869283613752	3.86169772066807
10.4403501192006	10.5674986081237	10.4344275675443	10.447900000072	10.4537464506577	10.2872823077044
9.77396336843356	9.93168176796871	9.85022579227661	9.79440027625188	9.7628231404804	9.73194494992686
10.1755495506362	10.0468917366384	10.048468724033	10.2954725758212	10.1766102466923	10.1730057023637
9.33873638257392	9.46648537891434	9.29138811194154	9.48855715584869	9.52643983487557	9.3534314049506
9.24911345271373	9.19928267955875	9.11390583153224	9.34508493154791	9.31632633163147	8.99080037944164
7.34429590791582	7.050715581125	7.31885909029179	6.98338891573284	7.11219576498088	7.2166327120511
7.16490692667569	6.93473087383124	7.12753072348083	7.46754825996681	7.0087879210309	7.53000777126236
3.95419631038688	4.04718658977498	3.94342298032825	5.72054901037392	5.65655861948655	4.86139388414393
3.85798099512757	3.96505430423864	3.21895220572771	4.92307296753624	4.74986991575351	4.61503258219888
9.70130646195862	9.93872854516617	9.78570566566279	9.86105142938305	10.1476079160299	9.92270094235378
6.72109918870719	7.47184644201005	6.61071743729548	7.12708779905238	7.60116119604586	7.12176143693097
5.59991284218713	6.21158202112632	5.77396368807613	5.91576051493452	6.2544230940051	5.67692578483052
7.60362634498619	7.10528329115956	8.22649337717027	7.75838588064845	7.59417391904496	7.63743921939989
6.15987133677839	6.05034380213564	6.1458748673797	7.89491652908919	7.88356242466225	7.90228121140111
7.35314682549808	7.26522357674869	7.49684276372154	8.17586606374817	7.80778333753129	8.24113973910088
10.2591547688668	10.3497746160327	10.2542900747937	10.3871726865607	10.3659104482667	10.4028994563077
6.01122725542325	6.03122232295202	5.98208327555307	6.65423019246572	6.80036072443166	6.76922471325639
3.39231742277876	3.03919762325003	3.08032555527072	4.97652879330422	4.69279901962163	4.03042321534228
8.95274124718649	9.22881508196734	8.84848235851652	9.11277501906773	9.41987904099791	9.14023569068202
10.5386739530827	10.4507535750792	10.4413937162422	10.5159805597154	10.4803980155196	10.3997188516946
6.17990909001493	5.82405082993398	6.00354619900992	6.62403190293711	6.09660801779427	6.51150609859604
5.06608919045777	4.45868139359118	4.75443751320717	7.36633516835509	7.20834073040967	6.80609512785337
10.2532565797812	10.2247852748921	10.0957005495021	10.2354302427855	10.2429982631703	10.1705281885222
6.45121111183233	6.75193635743088	7.24518468810899	7.33978692873326	7.11219576498088	7.76949515234983
10.3404064908533	10.2717088917177	10.1499507846788	10.391733160063	10.397026462974	10.2583649151717
10.2836671674915	10.3339773831449	10.2158272593157	10.2777414539405	10.2500679862816	10.2336282848024
7.95128471496697	7.67570266565599	7.95607936924588	7.75838588064845	7.52226746599461	7.84939642961603
3.52356195605701	2.43156056860666	1.78917717231585	3.6571655276825	3.12869283613752	2.2415304897091
6.77478705960117	7.06914286065278	6.61071743729548	6.9114674797308	7.32401687857265	7.05152245904692
8.60177078840771	8.85840012364035	8.5630561122971	9.31892321225818	9.47596957926367	9.2320591383571
9.38046106508897	9.49091738221593	9.14405477558414	9.38242284811511	9.49183272945805	9.20844390569034
9.90312867681232	10.120791208852	9.9684505408056	9.96147793658225	10.1691498988663	9.94019682448262
6.93663793900257	7.45806019510893	7.06511207103101	6.57741493905821	7.18019926102211	6.69259761995601
5.94251450533924	6.19455929610622	6.65304911420972	4.39484919493275	5.04986450203883	4.66770745902438
9.7490313820402	9.76955418407353	9.68063501862926	9.36093350801959	9.46171307241793	9.30071729797593
4.83289001416474	5.44097921490548	4.17242936937469	5.1712314564881	5.76728583436149	5.25701345331335
7.7515440590891	8.00660058563935	7.82644379418854	8.04539983798953	8.11277969601861	7.91378021521461
10.5132341138061	10.5258171515919	10.4881620107207	10.3724736871661	10.4956383952328	10.2276769459456
9.09671515448854	8.83017433160711	9.06895975678706	9.07915771293919	9.04879175700086	9.05821338473601
7.80413102118332	7.56471605858401	7.96198574243047	7.49965112390853	7.32401687857265	7.49238481841666
8.64205169292798	9.00990550027901	8.92243859019746	8.87459662377332	8.7704700051111	8.74844686531812
8.15734693536284	8.15296604946379	8.04235763908448	8.14686924907435	8.32148903174563	7.80074080773791
9.69609817095586	9.53697336714396	9.62821743782099	9.6278193673868	9.55685571773265	9.4022401974394
9.89860138740394	9.88742244097113	9.93005248088398	9.76997411601522	9.90344341323375	9.7501928064126
9.77396336843356	9.85172425338899	9.72576134760208	9.92453534937401	9.98528551506357	9.8162851018403
10.1592406504117	10.2753955129481	10.0334034270915	10.3585449567439	10.3603452391668	10.1877840115916
7.09275714091985	7.06914286065278	7.33673427911691	7.59157624001969	7.60811300448288	7.8373821899121
5.14974711950468	5.18354465032151	5.89307448108856	6.66907720564851	5.94182211198099	6.40392530783205
7.00562454919388	7.22487839386286	7.48075984531488	7.55403957399572	7.57299561058939	7.80691127601743
6.34872815423108	6.69327872885986	7.2069672023013	7.72530950270928	7.53695396943868	7.61656991216864
5.68650052718322	5.34991348350369	5.09930304448597	6.0860546750644	6.05413939557822	5.87221758745769
10.2246046815385	10.3099411730867	10.0957005495021	10.8037372686471	10.730300830677	10.6818908577981
9.08613622502731	8.73636818770251	8.22152971684051	10.3331014017822	10.0095144233729	9.93147482902087
7.60362634498619	7.55828357645408	7.44807564601258	9.25652039730496	9.33019985584746	9.07915059202018
6.13955135239879	5.99217512922317	5.58982794999034	7.25682265235757	7.57299561058939	6.92273611391144
4.7279204545632	3.4611352150646	3.67380846999506	5.69017912492378	5.65655861948655	4.61503258219888
4.55458885167764	4.2680429586017	2.92781414019725	7.73199060382378	7.78968391125492	7.44593248148682
6.66533591718518	6.92461600238201	6.82400362731973	8.34620108429758	8.4053623799268	8.3473137754296
6.83920378809694	6.29371430666266	7.13768971026601	7.1059613915568	6.88522435842188	7.19814043505184
6.45121111183233	6.06920687503317	6.78622047587905	6.68376106153824	6.1377991926407	6.59785699151982
6.27612440527424	5.95200412229863	6.82400362731973	6.42693163015787	6.23566248115739	6.76922471325639
6.86418614465428	6.27766992137209	7.02203238586795	6.78226377201965	6.09660801779427	6.43547174636767
5.74146698640115	5.65824728830633	5.64474713235534	5.83556340367804	5.74043196766772	6.16190573552147
5.14974711950468	5.47006039493839	6.22160932828739	6.46186740938351	6.61301499579721	6.30502302003059
10.2461467746359	10.600699473969	10.3296673014166	10.5118256513954	10.5773508666765	10.4322589140376
7.1548181090521	7.86394295583936	7.30077172810054	7.76490402742289	7.84328001117723	7.22579261583046
4.4262647547021	4.19823610548472	4.24170686140998	4.92307296753624	4.28907007014501	4.31909552746624
9.86186234005915	10.0061904230958	9.71086722904191	9.96398844448675	10.2267005229377	9.81943457397659
6.88874324889826	6.81921907576969	7.2069672023013	6.21652090082305	5.9878601721241	6.46635747769103
4.28540221886225	4.19823610548472	4.30797131761662	4.74853600189173	4.80465735438032	5.03257013096887
4.83289001416474	4.91127008674041	4.93660547935903	5.30064388294993	5.50423474277931	5.35760287208639
5.5077946401987	5.44097921490548	5.53285524436486	5.0774233017496	5.00421016375909	5.1859278968944
2.70043971814109	3.19445149801781	0.893482945537092	1.19073971427664	3.45242805283596	3.19513728444974
4.55458885167764	5.25248933778294	3.46328913025229	5.52702337209689	6.2544230940051	4.94946421443198
8.04165915163721	8.64766779667094	7.66338318254298	8.24571911597253	8.66566497598973	8.17067698521894
4.35755200461808	5.44097921490548	2.92781414019725	5.1712314564881	5.21863201240317	4.44468113392301
0.584962500721156	1.80065887288731	1.78917717231585	5.72054901037392	5.91820940080216	5.54027812272484
6.56224242422107	6.30957636544649	6.0247110166559	5.94145779612026	5.84482559774728	6.25296797709771
10.5063075811003	10.5823521257994	10.4825348168303	10.4566021958512	10.5589840745435	10.3901356714701
10.4194335507054	9.94690507320224	10.0898760135093	10.0204653874016	9.77996894592317	10.3324021487068
8.5018371849023	8.2777500398397	8.24618789846567	7.94698353577504	7.92819377385903	8.25028544138794
7.66888498426625	7.38700943063481	7.15780673343531	5.38044176580813	5.17834959891815	5.22189894279918
8.30149619498255	8.21070499324537	8.58279527915602	7.56918101011003	7.65581197133343	7.75680914063995
7.65463602852797	7.10528329115956	7.7740053340793	7.59157624001969	7.55148464497314	8.13660557417697
9.05934446082443	8.80136597760038	9.31582877016739	8.70243018124937	8.8622826101323	9.0529323056195
7.2240016741981	7.28888255249837	7.30984224520264	6.92372644130374	7.25399506868941	7.06176374858863
10.6532929453828	10.5867775334227	10.5454850829785	10.6166336816894	10.607942419017	10.6686841447552
8.1873520732005	7.784006260456	7.46450537254252	8.66979809704666	8.47337928118054	8.60870190564761
5.96578428466209	5.88949310290092	6.49172296812844	7.0736319732844	6.88522435842188	7.13152796115113
3.52356195605701	3.33415260851929	3.57218132756176	3.91245686687681	3.30010417612872	4.10805902261312
0.584962500721156	2.66474236985273	0.893482945537092	6.59313532554514	6.46153440933915	5.56863937693951
2.4594316186373	2.15145515053493	0.893482945537092	1.19073971427664	0.924562269486935	-1.29474102694147
4.55458885167764	2.66474236985273	3.76907963919325	5.88955933351121	5.21863201240317	5.32482952851552
2.90689059560852	4.12475355267435	3.94342298032825	5.88955933351121	5.5360850927584	5.84917430976909
7.25266543245025	7.47868883880936	6.44459006529813	7.45120288869809	7.42276257905375	7.17941332921603
4.49185309632967	4.33452438750865	3.94342298032825	4.68489457224183	4.36517316587071	4.25205035649873
1.32192809488736	-0.915532320729043	-1.55904674355704	5.1712314564881	3.71407883415158	3.86169772066807
3.52356195605701	2.15145515053493	1.78917717231585	5.96667019389722	5.81946370032106	5.38966369491998
1.32192809488736	1.33099539615863	0.893482945537092	5.02792810856376	4.50575837081054	3.86169772066807
5.37503943134692	5.86801812314063	5.56160784027874	6.51261594297227	6.64139950037998	6.27052461024978
8.16239132875691	8.67110332978336	8.71063998104333	5.59469441107059	5.68509097069813	6.6661441794192
5.91886323727459	5.77865345794236	5.86998551855742	4.39484919493275	4.28907007014501	5.29131127280994
6.19967234483636	6.93473087383124	6.1458748673797	4.31130840363534	4.74986991575351	4.61503258219888
5.44294349584873	6.30957636544649	5.72358414524602	6.21652090082305	6.46153440933915	5.80197860957365
10.4527560290325	10.5911889550095	10.3859537074757	10.4721247414377	10.4598100426315	10.2803936703415
9.08081752760833	9.03475131430204	8.66673272151956	8.97027676962643	8.8622826101323	8.57616956216181
6.31288295528436	5.93147660305459	6.10654772022759	6.52911266409833	6.17778753197355	6.35530310933329
7.00562454919388	6.91442729910107	7.02203238586795	7.70506339660686	7.39873558871532	7.27958848069682
9.01541505238669	9.04811945624233	9.02851417264177	8.30343847692131	8.48073233681198	8.07116269716572
9.78545246815854	9.44662712599258	9.60232145402498	9.41118043092471	9.34588510471714	9.19168531890256
10.1567151442247	10.1663119651054	10.0884163942656	10.0700261521567	10.1573437626348	10.1680465055347
6.09803208296053	5.63286756818037	6.22160932828739	6.47899863684373	6.37900924641066	6.28787468998334
8.35974956032233	8.96120825405086	8.73568020789614	7.64952428784891	8.02870435992071	7.92519025098955
8.5372184005386	8.64471049439534	8.4346129646472	7.35754423244253	7.86068918613713	7.40607222345864
10.6361714416359	10.5955864786844	10.6224845024239	10.6158639711617	10.5709903173208	10.6364969734151
8.60917873814198	8.45472176025373	8.5945172013711	8.41589693152776	8.46598653274885	8.53164573472788
4.55458885167764	3.96505430423864	3.57218132756176	4.31130840363534	2.42911544773853	4.03042321534228
5.71424551766612	4.99462895069659	4.97893715627328	5.12515042661382	4.80465735438032	5.1859278968944
9.92407018558534	10.379988915876	10.0559458851286	9.95391798748215	10.3997383516253	9.99845519976131
8.35093918154643	8.07948349665342	8.12401158391599	8.20424697006265	8.42459729333214	8.23193696497944
7.95128471496697	8.28159534847529	8.74275962770871	8.05066054336377	8.19199073877468	8.36428938464992
6.36632221424582	6.12431322141483	6.39595266942239	6.29691912849157	6.55441768029042	6.40392530783205
9.35204342579543	9.26154676737019	9.4635991329016	9.07915771293919	8.86782155932642	9.24604886951717
10.4267888945956	10.6515282061004	10.6720694058165	10.4574693064845	10.5057052337352	10.4752304385516
7.02790599656988	7.72805303173821	7.51275771124226	8.93553315889813	9.2064585543764	8.81209168307862
5.94251450533924	5.60701782661654	6.27603805607014	5.80772453343067	5.65655861948655	5.51136073019216
8.4655664048094	8.40640582147532	8.6851814017439	8.53797595051045	8.23653135783767	8.44235790485762
9.29117069932186	9.44995651612671	9.48761433783416	9.45410730835752	9.49007920383898	9.2529942815728
10.9833499276765	11.1180748313783	10.9899407281038	11.2022003293209	11.1808265557928	11.0857370102376
9.61010206299966	9.4298600036379	9.64002260240507	9.12927174019379	8.89518517337369	9.27363638826429
7.67595703294175	7.18333228675023	7.80699022308992	7.01794818961951	6.95400048240409	7.0920676867889
7.09275714091985	7.43712211023457	7.51275771124226	7.29433297340048	7.52226746599461	7.46934154072806
5.02236781302845	4.99462895069659	4.17242936937469	7.12708779905238	7.0087879210309	7.03082401727379
5.59991284218713	5.49854803987063	5.64474713235534	6.46186740938351	5.91820940080216	6.27052461024978
6.67948009950545	7.18333228675023	7.11730355506614	6.86127500833862	7.2894534460658	7.04120955151415
5.02236781302845	5.44097921490548	4.89306416366416	4.97652879330422	5.7130409881829	5.51136073019216
8.05799172275918	7.87939528506805	8.37285692111933	7.79702618580882	7.99252669678779	8.24571967994747
8.67771964164101	8.58111431293473	9.02264759225292	8.69920260132479	8.67205706844071	9.06347561964077
5.79441586635011	6.37128126956202	5.67148189482185	7.08449558953895	7.18019926102211	7.06176374858863
10.0707918094231	9.89106378082388	9.87730199377073	10.0907163839493	9.87327114266875	9.89007590657915
7.21431912080077	7.93954877173265	7.71969785409848	7.02927213399475	7.57299561058939	7.30576798061159
5.74146698640115	6.41583333284508	5.98208327555307	5.83556340367804	6.37900924641066	5.45176717702648
6.96000193206808	7.54532899482042	6.76050100671076	6.01571120032168	7.18019926102211	6.30502302003059
7.58871463558226	7.93954877173265	7.63442568648439	6.80912331837502	7.13197232989403	6.6661441794192
8.4241662888181	8.56866521233803	8.44323444379122	8.38355120837642	8.49168842181581	8.29075340098742
7.38801728534513	7.80577428292688	7.53632275363946	7.76490402742289	8.07385691077288	7.77579746863928
5.06608919045777	5.47006039493839	4.75443751320717	1.19073971427664	2.08493950349443	1.57497005349077
9.42101285577923	9.44328977556364	9.47674523059894	9.43561265408545	9.50404494190941	9.46356877521684
6.13955135239879	5.97223413077223	6.10654772022759	6.06301587262497	5.76728583436149	6.32197423847032
6.86418614465428	6.6194723138318	6.36264331316902	6.40911513368528	6.47745904599472	5.91725130849765
10.6013065261218	10.6494175512346	10.678031626819	10.5949123974026	10.6363468132712	10.6283392034395
10.5260101070617	10.5033280326808	10.4948873281786	10.6560596945633	10.5789363989189	10.6237875338777
8.283088353024	7.76745453111715	7.71277128592765	8.48971840960667	8.271149398734	8.35157603205928
4.6724253419715	4.2680429586017	4.37147393822559	5.69017912492378	4.9080651983303	5.54027812272484
8.09539702279256	7.94444648255384	8.4603324338155	8.17107674880335	8.32148903174563	8.42221087338691
5.22881869049588	5.07328898033306	5.74898210607065	5.69017912492378	5.5360850927584	6.12384582274151
1.32192809488736	1.33099539615863	0.115065214379401	3.6571655276825	3.58949268174602	3.04754022806541
10.2076244682268	10.3018362371749	10.1273435290712	10.3678468908567	10.4718572748898	10.3111422542891
5.96578428466209	5.65824728830633	5.31479211508739	6.94791203259644	6.78779638564993	6.59785699151982
5.44294349584873	4.86764634415128	3.94342298032825	7.30354830260935	7.01948722014893	6.91147850376891
5.74146698640115	5.52646589352974	5.93822866989535	6.0395728601124	4.85733705373553	5.56863937693951
9.40407713624123	9.57701141259652	9.33270694369179	9.42814251617206	9.48832343010953	9.27818454843763
10.1478408936723	9.90793221755467	9.96211768026709	10.0677073360623	9.87327114266875	9.96748100638856
6.05528243550119	6.106185094514	5.41209169373501	6.31628493759431	7.05109254560326	6.06484836488198
3.95419631038688	4.19823610548472	4.30797131761662	5.94145779612026	5.50423474277931	5.72822625357209
7.08214904135387	6.70520911047886	7.30984224520264	7.39236620143969	7.09212942325533	7.51507357004614
3.39231742277876	3.78469460606435	2.92781414019725	5.88955933351121	5.68509097069813	5.54027812272484
1.32192809488736	0.617961414902942	0.893482945537092	2.32291389144078	2.70393463167972	1.07876106554831
5.68650052718322	5.75538881686638	5.86998551855742	6.44451369223554	6.07553832034428	6.43547174636767
7.7176764230664	7.82188037875835	7.38913516845317	8.23203758921987	8.19651055581912	8.06083172835132
10.7138160802345	10.7944060274676	10.5722951055148	10.7841956668394	10.7514192649	10.6063619234363
9.10983065427879	9.0235125567114	9.05751299968415	9.13860779521535	9.05121137480587	8.80584938902916
6.36632221424582	7.43712211023457	7.11730355506614	6.62403190293711	7.37427952237389	6.78161755733889
2.4594316186373	2.43156056860666	2.56759490347354	7.64241673152113	7.28067454855948	7.14123023145742
1.32192809488736	2.15145515053493	0.893482945537092	4.47347289718894	3.45242805283596	3.67114404185098
9.88340698638837	10.0316304786977	9.91376325710788	9.93482884227379	9.88252457869358	9.78118958420115
9.17866485100647	9.37129648649023	9.58819301292606	8.69920260132479	8.6847524392737	8.91435721477299
2.16992500144231	3.03919762325003	1.40621359733427	2.92686429600143	3.71407883415158	3.45226315803808
9.21795769786411	9.36247315652978	9.41667359239772	8.82846587418038	8.98940019268818	8.92593521157055
6.94836723158468	6.89382402980806	6.82400362731973	6.94791203259644	6.92004411508054	7.02036482614691
7.12412131182919	6.98423415221805	6.90868332121957	7.19850572751797	7.20834073040967	7.07193440798545
9.87421293483087	10.3277854065374	9.95735070336435	10.0023099798506	10.1432585568477	9.9343878961751
3.39231742277876	3.4611352150646	2.56759490347354	2.65872461320796	2.08493950349443	2.48789179165415
3.64385618977472	3.03919762325003	2.92781414019725	3.15008487720176	3.12869283613752	3.76949646396102
6.67948009950545	6.03122232295202	6.25811029194919	6.62403190293711	5.8697263441223	6.32197423847032
3.85798099512757	3.57752311304631	3.34601263463123	3.7908987903721	3.71407883415158	3.94847214598054
5.76818432477693	5.25248933778294	4.70527704434117	5.52702337209689	4.57098514209268	5.62377625728727
7.38801728534513	6.95474334783916	6.65304911420972	7.37506864675975	7.31545745495118	7.73110496457617
11.0515488384404	10.8888678500223	10.9891323236425	10.9427479461479	10.8633734754375	10.9312831400076
8.67771964164101	8.50796668616945	8.71063998104333	8.72797394480638	8.65924290878694	8.81209168307862
10.6506030222153	10.6173686551902	10.6839706107855	10.6432979703322	10.5460603259419	10.6464066853766
9.19598729802851	9.19330047260819	9.08597026690138	9.23505459528711	9.117281194082	9.35558745762602
4.78135971352466	6.51457067548937	5.72358414524602	1.87331382109348	2.70393463167972	1.94559343497647
10.2437690319619	10.4844383687934	10.3799353648429	10.2158402843902	10.408739391726	10.2700000032741
6.15987133677839	6.27766992137209	6.50711544621529	6.19564207854942	5.56721150809851	6.00339198228885
5.18982455888002	5.41127924015914	5.17456981801981	5.56128723506343	5.17834959891815	5.62377625728727
7.39660478118186	7.70502824325612	7.65619523348951	7.28505364833729	7.39873558871532	7.62355921324781
5.59991284218713	5.63286756818037	5.86998551855742	6.10870297046836	6.1377991926407	6.32197423847032
5.56985560833095	5.65824728830633	6.1263381590892	6.49591300749508	7.20834073040967	6.69259761995601
7.60362634498619	7.50572786640421	7.71969785409848	7.43465509282854	7.68889337019691	7.85536704411681
3.39231742277876	2.86448913179062	0.893482945537092	3.3412987200248	2.08493950349443	1.07876106554831
7.59618975614441	7.72805303173821	7.56718643902501	7.8345804357235	8.00296105828423	7.80074080773791
10.8037275265531	10.9745541696925	10.8072723716658	10.8400318254483	10.976972520086	10.8254336729535
8.03066713624694	8.51772788785003	8.06456338537729	8.3545918022245	8.45108022698606	8.26840843157695
4.6724253419715	5.553836302863	5.47366946056314	4.22219422599246	4.69279901962163	4.86139388414393
10.8165837077876	10.658540761176	10.778762720789	10.6493186730064	10.5501121138719	10.7612337609685
6.82654848729092	6.43037352840495	6.25811029194919	6.63921635541942	6.2544230940051	6.54085512228322
3.39231742277876	3.33415260851929	3.57218132756176	3.91245686687681	3.45242805283596	2.69892829650727
8.50581155391959	8.88107682340212	8.68884448613734	7.75183578204648	8.12709519209623	7.90804192094231
6.70735913208088	6.76337778339134	6.27603805607014	5.1712314564881	5.59764616773689	5.42104232055518
9.6174674652942	9.86537263561323	9.82786653011502	9.60832405589336	9.85860251505773	9.83819145343775
9.80170835891646	10.0217308191031	9.91048441265	10.0204653874016	10.1594979169466	10.0287921974163
4.4262647547021	3.78469460606435	4.30797131761662	4.80928361895612	4.85733705373553	4.71856559429913
6.09803208296053	6.01183525918843	6.42854947114361	5.80772453343067	5.47162598030879	5.59646548109213
7.06069593168755	6.95474334783916	7.17766163808819	5.25888368930342	5.50423474277931	5.75322244125582
5.62935662007961	6.35610887939709	5.56160784027874	4.97652879330422	5.21863201240317	5.22189894279918
7.59618975614441	8.10586247670977	7.55183273358011	5.21577616260693	5.5360850927584	5.48186495162704
10.116993677547	10.1997470044136	10.1330268638601	10.1144569121746	10.1410786863972	10.1226469121944
9.2749604721406	9.41118051846475	9.37293493252879	9.14093165221691	9.32822650778069	9.03964627190897
5.84549005094437	5.47006039493839	5.31479211508739	5.94145779612026	6.01031154906213	5.77780200635968
10.794009645021	10.7739490197488	10.8388323654533	10.7712358248988	10.8876187516721	10.785126715573
8.12153351734003	8.533846382799	8.40404776624467	7.77784570184833	7.93367179444863	7.76949515234983
6.4178525148859	6.70520911047886	5.77396368807613	5.77929330256666	5.9878601721241	5.87221758745769
8.91139198784346	9.33204966425943	9.08032116914773	8.7867522435	9.28203653379145	8.97415215258561
9.73216742566338	9.38355619273259	9.46799377869837	9.78439646260209	9.51786969851386	9.69132992812469
10.8753654006418	10.8715612844097	10.8854124890663	10.8651833789	10.8920385449273	10.8451814207245
6.53138146051631	5.70766293195228	6.23996909705317	5.62728669610016	5.94182211198099	5.67692578483052
8.19229281447077	7.63358342241635	7.89572128622383	7.90666357124338	7.74021565940898	8.17548070206342
7.51963625284321	7.24922516491679	7.30077172810054	6.98338891573284	6.37900924641066	7.04120955151415
10.9797824307031	10.7261279332147	10.8081832159092	10.7379240830792	10.6877931069263	10.7462065628389
5.96578428466209	6.37128126956202	5.02012459256767	8.23203758921987	8.57631786460169	7.35677271029673
9.05120894091477	9.36600918413822	9.05463782454085	9.70459857974389	9.79409494348348	9.16250567411899
7.38801728534513	7.4229868385329	7.58238698774818	8.05590061846788	7.92819377385903	7.80691127601743
8.4655664048094	8.6941518807363	9.0603827601818	8.97554265797504	9.03662912535971	8.83066157923701
5.71424551766612	5.68317377483728	5.67148189482185	6.56150740071845	6.9427749824933	6.38789536992662
7.73809225962049	8.13175217379536	8.19646595487929	7.96948878252892	8.24961588400713	7.79454441304495
6.09803208296053	5.86801812314063	5.53285524436486	7.97505636324681	8.07878318702502	7.63743921939989
9.60825482197791	9.76955418407353	9.44143376211797	10.2095938338761	10.1476079160299	9.8474811834776
2.4594316186373	3.19445149801781	1.40621359733427	4.47347289718894	4.0315319145068	3.56576066593543
4.7279204545632	4.8226151437651	4.65447759454398	5.1712314564881	5.3688650439388	4.99160250306151
8.71252700043982	8.85585759807042	8.48143862128058	6.40911513368528	6.70988893746113	6.02416330830473
5.06608919045777	5.2184426217989	5.06022802214812	5.02792810856376	5.5360850927584	4.31909552746624
4.28540221886225	5.18354465032151	4.54749737035094	3.3412987200248	4.74986991575351	3.76949646396102
8.24555270625568	7.81116365700408	8.31785513559816	8.38763750342371	8.20101550501748	8.56884164761944
6.07681559705083	5.86801812314063	6.32858955248043	6.57741493905821	6.56930373252129	6.83017304666103
8.79928162152192	8.26615014356409	8.67782871016208	8.87175964300677	8.61674894323248	8.97135908400959
10.7138160802345	10.4203900570786	10.6286435234343	10.6914484868522	10.6340655745626	10.7924637444746
10.5975870395862	10.5933894486107	10.5444028085198	10.7280496416542	10.487192464539	10.4972493578608
4.4262647547021	4.2680429586017	4.80206146329021	6.0395728601124	5.13684632212839	4.99160250306151
6.45121111183233	7.14918144199688	6.98890407302384	5.62728669610016	6.36189023198712	5.62377625728727
4.97727992349992	5.03451298267111	5.24629328549821	3.5085438943729	4.20848780993131	3.94847214598054
7.49585502688717	7.8946784248112	7.41467502395154	7.13752705089237	7.47723864308219	6.99922124150443
7.24317398347295	7.44413642726614	7.27323165850794	6.84842666473945	7.15146736829246	6.61176973402048
10.6434052771157	10.5689910927909	10.7647738614684	10.4661096045444	10.4024448808093	10.4301810837998
7.2336196767597	6.79714990218726	7.02203238586795	7.78426983652563	7.44637529023258	7.75680914063995
7.04984854945056	6.98423415221805	7.63442568648439	7.23766508493408	7.16111179773814	7.65801731747867
5.53915881110803	5.41127924015914	5.53285524436486	5.94145779612026	5.04986450203883	5.56863937693951
10.5712786185146	10.3550008791814	10.3433174465282	10.5406423013845	10.5346511278522	10.4301810837998
8.21674585819531	8.42385412556863	8.23144092169138	8.46299316995953	8.56257116628129	8.48573573108255
6.15987133677839	5.7317298411167	5.98208327555307	6.19564207854942	6.15793931033575	6.30502302003059
6.51569983828404	5.60701782661654	6.16516426891851	6.39105786646756	5.84482559774728	6.14299855645079
6.88874324889826	6.30957636544649	6.49172296812844	6.25732460377796	5.84482559774728	6.08477758394146
4.6724253419715	4.57269135888201	4.17242936937469	5.21577616260693	5.59764616773689	5.1859278968944
6.93663793900257	7.59644120039137	6.96641152630222	7.04050091804882	7.67575654695937	7.04120955151415
5.18982455888002	4.91127008674041	4.30797131761662	4.97652879330422	4.9080651983303	4.81530451540871
2.16992500144231	2.86448913179062	0.115065214379401	7.92985230831482	7.87787983011317	7.69168863784795
9.99223026496589	10.120791208852	10.0752165221578	10.0769585539013	10.0250364231681	9.97316128213453
6.90086680798075	7.53880633738145	6.66690232210782	7.62086437010447	7.92269375312772	7.39796923731864
5.10852445677817	5.03451298267111	4.75443751320717	4.68489457224183	4.80465735438032	4.86139388414393
10.6316318059176	10.6451866427608	10.7016499342771	10.8400318254483	10.7444159086951	10.7940892500316
7.87344411251538	7.80036401975067	7.7740053340793	8.64982934525847	8.29234956390152	8.66482243770255
4.88264304936184	3.33415260851929	3.57218132756176	5.41862200436187	4.20848780993131	4.50367859178255
4.6724253419715	3.68494888616691	3.57218132756176	6.33537408280267	5.50423474277931	5.45176717702648
5.84549005094437	4.99462895069659	5.31479211508739	7.11656634753293	7.06146762038611	7.34839348453105
6.31288295528436	6.19455929610622	6.36264331316902	8.61587027641714	8.37004371797799	8.97135908400959
5.14974711950468	5.14775176222301	5.09930304448597	8.66649062644929	8.48073233681198	8.74192866788993
5.76818432477693	5.84620758327249	6.47617342122666	6.40911513368528	5.94182211198099	6.3387328252581
7.29001884693262	7.3500801298528	6.83639265795036	7.08449558953895	7.16111179773814	6.83017304666103
10.2064039139738	10.1523083749724	10.0663526539824	10.5680528510472	10.5931241861181	10.5316156878515
8.13699111208023	8.51448173254524	8.33179281545032	8.06631952068268	8.38585345570392	8.18504144716882
2.70043971814109	3.68494888616691	3.76907963919325	4.68489457224183	4.69279901962163	4.10805902261312
5.56985560833095	6.19455929610622	5.50354968015174	5.56128723506343	6.17778753197355	5.42104232055518
3.24792751344359	2.43156056860666	1.78917717231585	2.92686429600143	1.62413965788592	1.94559343497647
6.65105169117893	6.24501706043451	5.96031372854794	6.23707849767554	5.65655861948655	6.25296797709771
9.24436383512051	8.78539806864952	8.96880653990124	9.11750918678022	8.93786058954736	9.52052319434864
10.9918760990034	10.9745541696925	10.9051917591949	10.9737340868517	10.9348584032676	11.0547525276011
10.963257356633	10.908303996544	10.9769545094405	10.9104086853872	10.921350527307	10.9511328782215
4.97727992349992	5.80153669423368	4.54749737035094	3.7908987903721	5.13684632212839	4.25205035649873
8.28771237954945	8.34905876179672	8.28959140652563	8.35876748511988	8.60675252424007	8.52030152673348
6.56224242422107	6.38629051258573	6.70772196925571	7.34869507798719	7.35772943188071	6.94499675947448
5.06608919045777	4.67808828549433	5.41209169373501	5.91576051493452	6.39591690957464	5.87221758745769
8.79603960882977	8.7026979042803	9.07748874756297	9.35105019787973	9.19779763494059	9.24836764321392
10.0119260663068	10.18999603111	10.1804980784139	10.2717784060119	10.3159505546261	10.2312506304908
8.87805091272854	9.12574634727806	9.21562226509259	8.80179989620853	9.1401258158849	9.01542554882432
8.8811139606751	8.81976722914277	9.28645258576825	8.86891662610638	8.70979548353556	8.67852511252036
10.579787329527	10.749260382762	10.7694510977183	10.5941300686688	10.6589526083179	10.5980352652392
5.53915881110803	5.68317377483728	5.86998551855742	5.41862200436187	5.3688650439388	5.32482952851552
7.36194377373524	8.39228842020708	8.00843024789281	7.66362697748074	8.0885828948247	7.68501559584094
8.26912667914942	7.65179036949039	8.73212812616217	8.17586606374817	7.95536735029603	8.6193884724634
6.11894107272351	5.65824728830633	6.52235399694284	6.15287947117315	5.21863201240317	6.25296797709771
7.0389189892923	7.03204177550261	7.94419749716459	7.30354830260935	7.18964414894972	7.49998658662637
7.39660478118186	7.14918144199688	7.83927622685496	7.73199060382378	7.75897627225669	7.67831222172061
7.33539035469393	7.13178749540005	7.7740053340793	7.89491652908919	7.59417391904496	7.98641465595551
5.2667865406949	5.80153669423368	5.77396368807613	5.02792810856376	4.69279901962163	4.38322475132988
7.14465824283188	7.37235474325107	8.21654983536974	6.78226377201965	6.42911861619703	7.15086908777932
7.24317398347295	7.02261034670218	7.75386615495354	7.38374541386583	7.32401687857265	7.28836671951592
8.1006623390052	8.28159534847529	8.58279527915602	8.41988564326304	8.54168888131301	8.35582600551162
6.01122725542325	6.06920687503317	6.72108909333658	6.51261594297227	6.30921053263191	6.40392530783205
4.97727992349992	5.41127924015914	6.06617867405699	6.57741493905821	6.21664129592218	6.28787468998334
5.59991284218713	5.553836302863	5.98208327555307	6.39105786646756	6.36189023198712	6.23519981315784
10.8753654006418	10.7053140647801	10.7769049425963	10.8581371536409	10.699451625401	10.8062237652904
9.02097993890421	8.6178089864497	8.62152270971	8.59157474457485	8.35806547845674	8.99080037944164
5.94251450533924	4.99462895069659	5.41209169373501	5.86283409386407	5.04986450203883	5.54027812272484
3.64385618977472	2.15145515053493	3.21895220572771	4.39484919493275	3.12869283613752	3.56576066593543
7.64745842645492	7.43007236720918	7.99117901790681	7.51541788429146	7.42276257905375	7.69168863784795
5.68650052718322	5.25248933778294	5.67148189482185	6.86127500833862	6.44542241972027	7.02036482614691
4.78135971352466	4.3979828674226	5.56160784027874	4.47347289718894	4.36517316587071	4.25205035649873
7.51963625284321	7.32744429080199	7.95015001400658	7.73199060382378	7.51486472731373	7.86723624112212
10.8497960222456	10.9784531838253	10.8008811719931	10.9696044932453	11.0218496229599	10.7736405063299
9.23242092717608	9.0189915935626	9.04018000855548	9.15937843269474	8.91935350626419	9.04231307149158
4.55458885167764	4.2680429586017	4.49105231098207	4.22219422599246	2.93271575547781	3.76949646396102
10.4257404243162	10.4628773874174	10.4026797031007	10.4704088921629	10.454614323514	10.4651121157212
7.41362792902417	7.41586515904368	7.43146684536741	7.68450579975436	7.47723864308219	7.68501559584094
10.1592406504117	10.0769226239273	10.1202094225302	10.1421802601326	10.1670108850438	10.0665217229978
7.82972273508606	8.20260136437776	7.74029063199344	8.18063827396033	8.30907652996518	8.06600625915952
10.1680452682241	10.3090429451587	10.1273435290712	10.3576111918987	10.3806413823245	10.21930451602
10.2318211786574	10.2670868803689	10.3991109839664	10.5909961652936	10.5272661309918	10.6100476229925
6.05528243550119	6.48706542784921	6.00354619900992	6.83545357798999	6.83737658103969	6.3387328252581
3.52356195605701	3.33415260851929	3.67380846999506	2.92686429600143	3.58949268174602	2.48789179165415
7.26209484537018	7.31981669722073	6.93203768445511	7.40093172717506	6.98713524356421	7.102032182586
9.9851303734669	10.1633230000405	9.87562375310123	9.91546303317105	10.0831488035803	9.87500434190867
8.65642486327778	8.25836297607611	8.64429537322854	8.4238624838149	7.98727955120646	8.33014048363951
6.69348695749933	6.44476382237239	6.95503951551079	6.93587395622935	6.66920762982884	6.98853467468865
5.84549005094437	6.05034380213564	6.22160932828739	6.76862878188125	6.36189023198712	6.93390843830975
5.56985560833095	6.21158202112632	5.93822866989535	5.91576051493452	5.91820940080216	5.96095049880477
6.51569983828404	6.38629051258573	6.65304911420972	6.74093416483915	6.2544230940051	6.76922471325639
6.38370429247405	6.106185094514	6.83639265795036	7.06267931000191	6.78779638564993	7.20741555850155
8.32867492732795	8.15717040852183	8.79483220137091	8.61930528457901	8.63652550814562	8.76461741951942
9.78545246815854	9.52126305890599	10.0409546931578	9.90894488639661	9.72344173722546	10.0233225953474
10.5919897676151	10.4994137111253	10.795381584524	10.543083625034	10.4493988174147	10.6355927797833
5.33985000288462	4.99462895069659	5.31479211508739	5.41862200436187	5.17834959891815	5.38966369491998
6.51569983828404	6.63204758944358	6.90868332121957	7.38374541386583	6.99800437459596	7.44593248148682
9.12541347048331	8.87355878286544	9.16561258691815	8.96233882090094	8.76153843005335	9.02354340290381
11.2297200932374	11.1562991806876	11.281781405602	11.2557242946829	11.0355419176919	11.3109251110674
8.31061278165953	8.17386234019096	8.13983015891113	8.4278275236356	8.01846503505301	8.52409263362156
7.58120058192496	6.63204758944358	6.32858955248043	6.99500827102821	6.89692958627221	7.47706270897972
6.21916852046216	5.93147660305459	6.18421254661903	5.21577616260693	4.95698123108756	5.07243038899704
7.61102479730735	6.97447295053747	7.12753072348083	5.75024395329723	5.94182211198099	6.35530310933329
9.78381675932018	9.43659104092215	9.43247654382874	9.48497239866418	9.14915802221974	9.71008409698107
10.5985178106126	10.4756944292255	10.5280757697515	10.5870684216098	10.3988349852855	10.5699352134294
9.5127404628035	9.88985105602826	9.69960032097589	9.83368298796563	10.1850868900571	9.94164548841769
7.43879185257826	7.4087069579615	7.57480566676782	7.95264548254784	7.86068918613713	8.28185599983732
7.2240016741981	7.17487258720753	7.52850816023713	7.84073813067194	7.71479491429791	8.27738708803178
5.14974711950468	5.14775176222301	5.21085349344884	5.45574154237242	5.7936232483966	5.9392627584252
6.98299357469431	6.70520911047886	7.57480566676782	7.06267931000191	6.93145670880421	7.55942998938417
7.43879185257826	7.03204177550261	5.6175349382647	6.59313532554514	6.34455451542754	6.19900806390525
8.00281501560705	8.6178089864497	7.81350237989772	8.06112022447646	8.73438879666231	8.31276485091498
8.43671154213721	8.06610467712004	8.43028386408254	8.31210118109719	8.1079744162767	8.50886937826486
5.59991284218713	4.91127008674041	5.69775569006896	5.99141566847939	5.29580754618006	6.06484836488198
8.82495874052852	9.00534017764203	8.65181125713989	9.14556727677638	9.16704566683893	8.73865873358502
9.55746370159782	9.57701141259652	9.4635991329016	9.49569794740061	9.57181403378634	9.32291094132046
7.07146236255662	7.24922516491679	7.16776652296875	7.09527159503148	7.15146736829246	7.02036482614691
9.38478375009335	9.5322788128804	9.2310798012585	9.34508493154791	9.60770539475239	9.16004777393784
6.66533591718518	6.96464300743378	6.92040524343466	7.18853390930524	7.27183901261308	7.28836671951592
10.6640027628865	10.7726604471653	10.6530336519643	10.5902115396462	10.5844713505926	10.5651993719565
9.87574935142005	9.77746641774065	9.82786653011502	9.87184375409199	9.86261865670833	10.0123221544693
5.18982455888002	4.7760826298145	5.64474713235534	5.83556340367804	5.7936232483966	5.67692578483052
2.16992500144231	2.66474236985273	1.78917717231585	1.19073971427664	0.924562269486935	1.57497005349077
6.31288295528436	6.06920687503317	6.39595266942239	6.63921635541942	6.09660801779427	6.40392530783205
5.98868468677217	5.553836302863	6.203025654386	5.77929330256666	5.74043196766772	5.51136073019216
5.2667865406949	4.99462895069659	5.53285524436486	5.02792810856376	4.9080651983303	4.38322475132988
7.21431912080077	7.4229868385329	7.65619523348951	7.28505364833729	7.44637529023258	7.55942998938417
10.9711842724047	10.86975864169	10.8784721189755	10.986046840152	10.9722245081487	10.785943745936
9.5127404628035	9.33566350744815	9.69771437720313	9.60340545853921	9.56518605559151	9.52629141461242
6.29462074889163	6.05034380213564	6.52235399694284	6.27726851788744	6.01031154906213	5.91725130849765
7.66888498426625	8.52742130286109	8.13457552482895	7.87110801612209	8.31322654320571	7.97547034029226
6.74819284958946	6.68124549785499	7.06511207103101	4.68489457224183	5.21863201240317	5.35760287208639
6.69348695749933	6.75193635743088	7.08620365167145	4.86738918387135	5.17834959891815	4.90608638820704
7.68999797141945	7.6457477360192	7.6197379354353	7.82839423282646	7.88922153734871	7.92519025098955
9.0566377151132	9.36247315652978	9.04308256633567	9.8141859832289	10.0083131045929	9.73860668804105
10.9072662485311	11.0222566182468	10.8109124865622	11.0592903432537	11.1176155261336	10.9576905263319
9.35645197022176	9.19928267955875	8.93805186586324	9.49925408373535	9.55015477068097	9.07133393184398
4.49185309632967	5.03451298267111	4.70527704434117	5.38044176580813	5.94182211198099	5.35760287208639
5.59991284218713	5.553836302863	5.34792042793151	4.92307296753624	4.9080651983303	4.61503258219888
6.21916852046216	6.90416367821162	6.98890407302384	7.69139353376342	7.84910769367913	7.43804615377704
6.29462074889163	6.15987810458764	6.66690232210782	6.66907720564851	6.36189023198712	6.43547174636767
5.33985000288462	4.95357169221723	5.47366946056314	5.49185772577297	5.59764616773689	5.32482952851552
5.98868468677217	6.35610887939709	6.1263381590892	6.10870297046836	6.03240079118709	5.75322244125582
3.95419631038688	4.04718658977498	2.7583238043547	4.80928361895612	4.63324601438911	2.69892829650727
7.49585502688717	7.62746128035676	7.05445578722783	7.42630370664857	6.92004411508054	6.40392530783205
10.2720465243899	10.4556157436598	10.394339653653	8.98340278322278	9.01446042206537	8.965757026875
6.43462822763672	6.64451058431028	6.87296663054156	6.29691912849157	6.11735846509505	6.10444107215337
5.5077946401987	6.106185094514	6.22160932828739	6.21652090082305	6.05413939557822	6.16190573552147
7.35314682549808	7.22487839386286	7.74709351103234	8.10720125435074	7.88356242466225	8.06083172835132
6.17990909001493	6.69327872885986	6.77341500242242	7.42630370664857	7.53695396943868	7.36510459555128
7.35314682549808	7.14918144199688	7.84565214567088	8.05066054336377	7.97141640101207	8.18504144716882
9.17117679765177	9.3374669265	9.47237578710661	9.63585920776177	9.52130419140202	9.53203716123379
7.90388184573618	8.24265708714609	8.36834850844057	8.5269932795939	8.57631786460169	8.1658575699255
10.8474489039824	10.6281335888945	10.8271862471204	10.7266330314615	10.698725868457	10.8005734144421
7.87958324961278	7.69337184021963	8.03113223013505	8.07149866452747	7.96608758759074	8.33445259129454
8.82813648419411	8.93980644574753	8.98395420313909	8.81074781428248	8.76153843005335	8.78696238892989
8.33762190199251	8.4376574138436	8.1502853791631	8.47451235715283	8.58992794751106	8.49734791523129
11.0413169158294	11.1484421543378	11.0983312076134	11.1171372668553	11.197066918902	11.0492968366906
8.14720492494223	8.06161642196056	7.84565214567088	8.89707820458703	8.64955298637085	8.68193097954759
6.65105169117893	6.9939275672291	6.66690232210782	7.99162125438445	8.00814857706781	7.46934154072806
9.00422046631819	8.98228686830786	8.58671261389398	8.94900320682902	8.66245770679226	8.7901270677566
10.5338163894334	10.294592128009	10.3519406680985	10.433857520078	10.2829137536756	10.3544547430634
6.59245703726808	6.26143896928177	5.89307448108856	6.15287947117315	6.03240079118709	6.10444107215337
10.5082899861403	10.4417953718283	10.3221699068392	10.7252149178351	10.6730789893269	10.501217714826
8.67419226814568	8.55294605801886	8.2510720128195	9.01183401408678	9.25313863191018	8.90561367275368
5.44294349584873	4.99462895069659	4.37147393822559	5.52702337209689	5.17834959891815	5.56863937693951
6.54689445988764	5.65824728830633	5.67148189482185	6.13097377665755	6.2544230940051	6.58381174471598
9.67507492038544	9.97458074862588	9.79988929219355	9.95012191265887	10.1712855769932	9.80838186873842
5.59991284218713	6.35610887939709	6.06617867405699	6.42693163015787	7.01948722014893	6.6255524489885
6.69348695749933	6.76337778339134	7.48075984531488	7.00652745822151	7.0717646863501	7.14123023145742
8.57553924683453	8.34905876179672	9.13589131477188	8.7216336366396	8.70357752360817	9.00726276174436
5.62935662007961	5.14775176222301	6.0247110166559	5.56128723506343	5.59764616773689	5.89490633908718
8.92332748541919	9.533845419276	9.38224797831626	8.86606754733167	9.43274695211062	9.03964627190897
6.59245703726808	7.77851079606649	6.9435820000762	6.21652090082305	7.18964414894972	6.38789536992662
10.8061468033205	10.9395361643002	10.9086055771982	10.7329959836715	10.7954121128104	10.741163275733
10.3020676725265	10.2113589631121	10.2490422267354	10.3187539041769	10.2848793131395	10.3533599102237
7.18487534290828	7.08733003849498	7.22619575237561	6.35419435785788	6.4126183765819	6.16190573552147
6.57742882803575	6.40114007978326	6.58182856501109	5.72054901037392	5.56721150809851	5.75322244125582
9.70649601806119	9.91390759548099	9.73130932353821	9.13627988968039	9.43457539473388	9.04231307149158
5.22881869049588	4.91127008674041	5.13740108818874	4.92307296753624	4.74986991575351	4.61503258219888
10.8599229728618	10.6998919801689	10.8688772011205	10.7956857206758	10.5613937584286	10.8793078710711
7.37937836707126	7.40151185877262	7.12753072348083	7.59157624001969	8.00296105828423	7.75680914063995
7.19475685442225	8.19853183918631	7.55183273358011	5.88955933351121	6.68290277716974	6.28787468998334
4.88264304936184	5.60701782661654	5.82273080578509	5.21577616260693	4.57098514209268	5.48186495162704
9.75739000936664	9.68786264566809	9.71273697452051	9.72574887337761	9.78705015777731	9.80043605335616
8.82813648419411	9.1465647220213	9.00788156223909	8.63973193620786	9.04879175700086	8.66137678247312
8.29232163280204	8.52096651146521	8.26563112714053	8.27710821730634	8.30491390268325	8.25937477535222
10.845097960973	10.7950405030022	10.8081832159092	10.654564625944	10.7507205387004	10.6355927797833
6.82654848729092	6.72876825457695	6.74747663362919	6.31628493759431	6.50876334201068	6.28787468998334
6.17990909001493	6.22839964808162	6.5671761216006	4.12670951213927	4.57098514209268	5.29131127280994
6.07681559705083	5.84620758327249	6.25811029194919	3.5085438943729	4.0315319145068	4.86139388414393
5.4757334309664	6.5008857996807	5.79854232372537	2.92686429600143	4.36517316587071	4.18181137861468
5.44294349584873	6.19455929610622	5.6175349382647	4.22219422599246	4.95698123108756	4.25205035649873
9.73047013718422	9.92104444691416	9.81044104150192	9.89713149220919	9.90214530572292	9.89904546145077
7.39660478118186	7.31981669722073	7.36315995360307	4.54772630139037	4.20848780993131	3.04754022806541
4.28540221886225	4.86764634415128	3.34601263463123	1.87331382109348	4.0315319145068	3.67114404185098
10.3864014236408	10.3401420133942	10.3702563017408	10.4592018414943	10.3043812919784	10.322369866703
6.53138146051631	6.142208930024	6.42854947114361	6.39105786646756	6.2544230940051	6.6255524489885
5.18982455888002	3.96505430423864	4.8482420390064	5.25888368930342	4.63324601438911	5.51136073019216
10.0063260785249	10.0779832973461	10.0604146342956	10.0607266457106	10.1168682744015	9.96034975570689
6.34872815423108	6.12431322141483	6.84868177595625	6.42693163015787	6.4126183765819	6.67943021312972
9.66977088852552	9.66239287593135	9.81219258465324	9.60995957315887	9.41618017765178	9.49722201545534
4.4262647547021	4.19823610548472	4.70527704434117	4.68489457224183	4.50575837081054	3.94847214598054
7.86108690599539	7.85875393071124	8.38630267635916	8.17107674880335	7.78359721980726	8.29518205226546
10.5102696708982	10.5056713675658	10.6265932811151	10.6657370776475	10.6461885047014	10.599889700903
9.01262453886506	9.06793463973844	8.90983175615163	9.17304829553818	8.85672116768179	8.98803869367706
7.26209484537018	8.18625158855474	7.71969785409848	7.62086437010447	8.20550568386409	7.8130560339379
4.12928301694497	4.3979828674226	3.85874328642841	2.65872461320796	3.71407883415158	3.19513728444974
10.2485206049384	10.2123222800254	10.2555992178071	10.0395630586461	10.1691498988663	10.1938981984894
5.68650052718322	6.03122232295202	5.53285524436486	6.35419435785788	6.32699654004143	5.77780200635968
10.6640027628865	10.7120621859818	10.7249077574382	10.8157243482414	10.7295912434479	10.7670365668653
7.89784545600551	7.83780275085825	8.18122740415173	8.22744577219562	8.24526825076409	8.57616956216181
10.4517262680745	10.5196493596092	10.5691026971394	10.4241169919681	10.4931100806906	10.3922706552194
9.29117069932186	9.30094826674913	9.31582877016739	9.36682859451849	9.59638712106329	9.40640907588289
4.6724253419715	5.03451298267111	4.09985173013969	4.74853600189173	5.74043196766772	5.35760287208639
2.4594316186373	3.03919762325003	2.34953177419607	4.31130840363534	4.12286597339084	3.94847214598054
7.95128471496697	8.24265708714609	8.37285692111933	7.96948878252892	8.04895616439787	7.97547034029226
8.37721053038855	8.62082377412697	8.73922402896745	8.45913126715828	8.67524196132122	8.38939194421536
10.2270141936491	10.4261853934366	10.2956346676464	10.239518100472	10.3491465124677	10.0491244096483
5.84549005094437	5.18354465032151	6.22160932828739	6.15287947117315	6.29119049209987	6.61176973402048
5.18982455888002	4.67808828549433	5.41209169373501	4.12670951213927	2.08493950349443	4.44468113392301
9.49685377738804	9.46812755104723	9.61033642252945	9.60832405589336	9.68897758108717	9.56418019780605
9.09934781040319	9.02576755906284	9.39841009439322	8.74369433129331	8.87333819647943	8.87310306272109
6.19967234483636	5.60701782661654	6.36264331316902	4.80928361895612	4.36517316587071	5.1859278968944
6.59245703726808	6.38629051258573	6.72108909333658	6.33537408280267	6.01031154906213	6.06484836488198
9.01262453886506	8.88107682340212	8.90348901078667	9.02202447292704	8.66886475156076	8.68193097954759
9.35645197022176	9.2481618386932	9.47456207496209	9.23505459528711	9.17148130900443	9.34042847191913
10.8458820343841	10.8095544047866	10.7373590843261	10.9535554253759	10.9439925188624	10.8388908656582
10.732591435965	10.5562538146152	10.6007297550699	10.6220092763381	10.6401404537064	10.560448273236
8.74651432113846	8.46486112313224	8.51050461588681	7.99709756302965	7.92819377385903	8.3935344743755
8.10590850857116	7.69921220920855	8.02548836303944	7.56163173896098	7.57299561058939	8.17548070206342
5.82017896241519	4.99462895069659	5.24629328549821	5.25888368930342	4.57098514209268	5.14905748229743
5.98868468677217	4.95357169221723	5.38034382929138	4.92307296753624	4.36517316587071	5.54027812272484
8.06877827798541	7.89973584393786	8.73212812616217	7.54640402499523	7.33252313772935	8.02939736381796
8.70217268536555	8.46486112313224	9.22851440945078	8.80777182766458	8.62337291416972	9.12519998082298
7.71080643369935	7.784006260456	8.28959140652563	7.69824594590439	7.62875917421931	7.57392386297518
10.9214690605314	10.9193729514128	11.0801584620661	10.7916416799423	10.8819151201552	10.846749875823
6.467605550083	5.77865345794236	5.79854232372537	5.59469441107059	4.9080651983303	5.29131127280994
5.91886323727459	6.08781843278933	6.29375735309217	5.80772453343067	5.59764616773689	6.02416330830473
10.0960562391809	9.99160347364598	9.84680718764847	10.1300527908866	10.2660916083049	10.0837161930937
8.35974956032233	8.25836297607611	8.20654098248177	8.82552913137385	8.74349860844406	8.49734791523129
4.35755200461808	4.33452438750865	4.09985173013969	4.80928361895612	4.80465735438032	3.94847214598054
6.83920378809694	6.30957636544649	7.09664096900892	6.74093416483915	6.8251487915799	6.67943021312972
7.61838550225861	7.6457477360192	7.705813089482	8.05066054336377	7.83154971829302	7.86131358349375
10.118292233027	10.2624495134724	10.3617363940696	10.355741702347	10.3668357883839	10.358825964544
10.3292357417338	10.394431762066	10.3799353648429	10.2677882053936	10.4158978703384	10.2072608413473
10.502334580198	10.4804706397092	10.5616276319628	10.5126576672623	10.4078419452185	10.6164755150937
10.2209828510818	10.1603276208825	10.2879675200307	10.1166960705353	10.194560817072	10.2407383336119
4.78135971352466	4.33452438750865	3.57218132756176	4.02387282684165	4.36517316587071	4.25205035649873
6.03342300153745	6.87291208584333	6.52235399694284	6.0395728601124	6.52415118166912	5.35760287208639
7.49585502688717	8.02518117483003	7.67053738523249	7.7185948280814	8.23214192035759	8.01876856272967
5.59991284218713	5.97223413077223	5.44319159712969	4.61806977613308	5.13684632212839	4.86139388414393
7.3264294871223	6.94477297579113	7.21661180648301	3.7908987903721	4.4372689337294	4.44468113392301
5.71424551766612	6.12431322141483	5.93822866989535	1.19073971427664	1.62413965788592	-1.29474102694147
6.15987133677839	6.05034380213564	6.34571155704058	6.21652090082305	6.30921053263191	5.82576525052785
7.58871463558226	7.49901705467061	7.16776652296875	7.53100077155629	7.59417391904496	7.16044535368381
9.21310421964191	9.35892814852413	9.22079221873316	9.21763016009525	9.49007920383898	9.25530216900362
10.0600203545079	10.0468917366384	9.96370336446208	10.0132327990311	10.0740149418186	9.85517817259556
6.81378119121704	6.68124549785499	6.9435820000762	6.59313532554514	6.76231651912023	6.65273736192784
8.07948478382682	7.73375037088038	8.18122740415173	7.32179046223626	7.24498514591931	7.60249114398081
5.53915881110803	5.07328898033306	5.47366946056314	4.61806977613308	3.58949268174602	4.66770745902438
10.2836671674915	10.3117358967695	10.4145154315246	10.3081336229586	10.3331232350758	10.2838420111971
5.56985560833095	5.65824728830633	5.82273080578509	5.65910290012106	5.74043196766772	5.65059044630124
9.47269083924278	9.77219658174283	9.54917065810306	9.25652039730496	9.75850293714572	9.16495948461408
8.24079133216196	8.20260136437776	8.23637245471355	7.64241673152113	8.0885828948247	7.87313520805668
-1	-0.915532320729043	-1.55904674355704	3.6571655276825	3.71407883415158	3.04754022806541
7.02790599656988	7.60893207705004	7.45631265187339	5.65910290012106	5.5360850927584	4.38322475132988
7.08214904135387	7.38700943063481	7.47265428166181	5.86283409386407	6.11735846509505	6.12384582274151
8.62021982550749	9.12574634727806	8.88751567402639	8.77459090868527	9.25938257884201	8.88204090685071
8.21674585819531	8.39583117883975	8.27526049487923	7.87110801612209	8.1079744162767	7.86131358349375
7.94544383637791	7.6151358479374	8.01982351497702	7.76490402742289	7.67575654695937	7.76949515234983
7.72451385311995	7.53880633738145	7.96198574243047	7.67758237784506	7.7464977957522	7.87313520805668
6.82654848729092	6.34076975633239	6.95503951551079	6.98338891573284	6.72318519065476	7.02036482614691
7.55074678538324	7.11417406103895	7.88335738574878	7.71184624081159	7.57299561058939	7.98095265057358
6.467605550083	6.106185094514	6.39595266942239	6.99500827102821	6.46153440933915	7.06176374858863
6.98299357469431	6.97447295053747	7.45631265187339	7.33978692873326	7.09212942325533	7.62355921324781
7.76487159073609	6.81921907576969	7.30984224520264	7.43465509282854	7.0087879210309	7.65801731747867
7.74483383749955	7.30443531676465	7.52065328524758	5.0774233017496	4.57098514209268	4.99160250306151
6.86418614465428	6.32526019507925	7.29164689620114	6.17443183258981	5.7936232483966	6.35530310933329
5.89481776330794	5.58068032540697	5.6175349382647	6.23707849767554	6.01031154906213	6.94499675947448
6.60733031374961	6.66910762874577	7.13768971026601	7.53100077155629	7.38248016556873	7.70494481490043
6.31288295528436	6.15987810458764	7.02203238586795	6.78226377201965	6.73635359328034	6.90013429577452
7.84862294042934	7.35754456556597	7.33673427911691	8.04011833925938	7.75897627225669	8.10172834606186
6.60733031374961	6.12431322141483	6.31127297552255	6.72686858823474	6.73635359328034	6.78161755733889
9.05392588153111	8.50796668616945	8.62152270971	8.65985102302854	8.33379004248321	8.60870190564761
10.4393114618188	10.4804706397092	10.4836619192292	10.4883163498528	10.4069439102215	10.3761824254766
6.876516946565	6.81921907576969	6.92040524343466	7.27570943236199	7.31545745495118	7.20741555850155
4.78135971352466	4.7760826298145	5.06022802214812	6.63921635541942	6.69646232676589	6.38789536992662
8.12670447284319	8.26226199020893	8.90030771031206	6.63921635541942	7.23591555435177	7.20741555850155
7.18487534290828	7.98776932327401	7.64171681223094	6.84842666473945	7.79574367035146	6.80609512785337
6.72109918870719	7.10528329115956	6.50711544621529	6.76862878188125	7.06146762038611	6.48156111510289
6.72109918870719	7.57111903381145	7.04372445855439	6.59313532554514	7.27183901261308	6.96692637942936
7.40514146313634	7.76745453111715	7.30077172810054	8.02414742276684	8.35002138295722	7.83133816601238
9.79522796602868	9.5860901187603	9.58006041257497	9.78152441971433	9.75127217419519	9.61021201740544
6.467605550083	6.52812268632857	6.50711544621529	5.45574154237242	5.81946370032106	5.96095049880477
10.1817734388088	10.1909741994415	10.428598018071	8.89986199192536	8.87058265566771	9.30741053079952
5.71424551766612	5.52646589352974	5.98208327555307	4.97652879330422	4.4372689337294	4.44468113392301
7.18487534290828	7.20840804168415	7.33673427911691	6.89909500763989	6.52415118166912	7.16995983679763
8.68825030913318	9.36070177792663	9.26153228593014	7.80966190586923	8.19651055581912	8.09161002323142
6.73470962022584	6.98423415221805	7.13768971026601	7.53100077155629	7.54423857874927	7.40607222345864
8.94982671075911	9.0189915935626	9.21043471157591	9.30462105419737	9.23211744679889	9.22029879080869
5.79441586635011	5.41127924015914	6.203025654386	5.3411384194437	5.09404585999761	5.1859278968944
7.12412131182919	7.02261034670218	6.62495905846883	7.44295460671009	7.39873558871532	7.16044535368381
9.52061868055628	9.20127106472683	9.35649887701386	9.53775941168524	9.53325753817231	9.36845799546823
5.89481776330794	5.58068032540697	5.56160784027874	7.1059613915568	6.8251487915799	7.02036482614691
10.0681064758588	10.0555381206272	10.0663526539824	10.1300527908866	10.1670108850438	10.1226469121944
10.693051295397	10.6473037000199	10.7316249576206	10.4840743861661	10.3952155492273	10.5287011814339
7.13442632022093	6.81921907576969	6.70772196925571	6.87400098490191	6.47745904599472	7.02036482614691
4.97727992349992	4.72794523364979	3.76907963919325	5.25888368930342	3.82827022453651	4.25205035649873
10.8149829364268	10.7758796509721	10.8027099659407	10.8308863269518	10.8497883051106	10.8777736813178
6.66533591718518	5.82405082993398	6.41233822916855	6.37275323174062	5.9878601721241	6.41978287747415
6.19967234483636	6.5548382607127	6.63906881088638	6.52911266409833	6.62728078439073	6.71858489623035
9.62844554013718	9.92223038254366	9.66529097584325	9.98266839603494	10.17873433137	9.89755431899075
7.08214904135387	6.95474334783916	6.47617342122666	7.67062289628403	8.14126259417991	7.85536704411681
4.28540221886225	4.45868139359118	3.67380846999506	5.49185772577297	5.4039824378323	5.07243038899704
4.55458885167764	4.2680429586017	3.57218132756176	5.96667019389722	6.52415118166912	6.41978287747415
3.75488750216347	3.03919762325003	3.85874328642841	5.25888368930342	5.13684632212839	4.94946421443198
7.30833903013941	7.03204177550261	7.84565214567088	8.28594274495345	8.08369180633515	8.50886937826486
10.1234747982441	10.18999603111	10.1386890807747	10.2637860535762	10.3453931608305	10.2792424292469
5.02236781302845	5.80153669423368	5.09930304448597	4.68489457224183	4.95698123108756	4.50367859178255
8.91438513215544	9.51651527830156	9.19213792809546	9.04965401338806	9.31831688913509	9.03697464116506
6.13955135239879	6.35610887939709	6.31127297552255	7.67062289628403	7.74021565940898	7.71808289526525
3.08746284125034	2.66474236985273	1.40621359733427	7.01794818961951	7.24498514591931	6.84206617375814
2.16992500144231	1.33099539615863	2.0949676812568	5.94145779612026	5.81946370032106	5.03257013096887
5.89481776330794	5.60701782661654	6.00354619900992	7.30354830260935	7.31545745495118	7.11192980206864
4.55458885167764	4.62638436895566	4.97893715627328	7.75838588064845	7.69541482690774	7.65118980636113
4.28540221886225	3.87778550452716	3.21895220572771	5.56128723506343	5.47162598030879	5.87221758745769
6.13955135239879	5.82405082993398	6.0247110166559	7.33978692873326	7.0717646863501	7.39796923731864
6.11894107272351	5.25248933778294	5.91581881934643	6.56150740071845	6.32699654004143	6.90013429577452
4.6724253419715	3.33415260851929	4.17242936937469	5.21577616260693	5.29580754618006	5.67692578483052
5.68650052718322	5.58068032540697	5.86998551855742	6.95984262470429	6.30921053263191	6.78161755733889
-1	1.80065887288731	1.78917717231585	5.77929330256666	5.50423474277931	5.65059044630124
4.83289001416474	4.45868139359118	4.80206146329021	7.51541788429146	7.29817642664819	7.35677271029673
4.83289001416474	4.45868139359118	4.37147393822559	8.53066420893323	8.63324918284762	8.38523774494077
6.98299357469431	7.01311475802897	6.84868177595625	9.21323831575008	9.117281194082	9.21082251873392
10.6586577921261	10.4947019896828	10.6898865381403	10.7956857206758	10.7324273890567	10.7512326617703
5.71424551766612	6.40114007978326	5.93822866989535	7.61360230093006	7.79574367035146	7.55942998938417
6.19967234483636	6.01183525918843	6.53744166845308	6.52911266409833	5.25776334086864	6.54085512228322
5.89481776330794	5.68317377483728	6.68063072463524	5.75024395329723	5.43822180424171	6.04464613434075
5.74146698640115	5.52646589352974	6.76050100671076	6.59313532554514	6.42911861619703	7.08203540478505
6.01122725542325	5.82405082993398	6.25811029194919	6.15287947117315	6.11735846509505	6.27052461024978
6.09803208296053	6.27766992137209	7.01106944380746	6.62403190293711	6.5985990382492	6.54085512228322
7.89178370321831	7.89973584393786	8.43028386408254	7.67062289628403	7.77134207474909	7.58111772976374
6.19967234483636	5.95200412229863	6.95503951551079	6.99500827102821	6.65537414532564	6.97777010304536
6.15987133677839	6.35610887939709	7.05445578722783	7.27570943236199	7.20834073040967	7.2166327120511
6.99435343685886	7.52566886485515	8.00270151041688	8.23661368081257	8.50255755284755	8.19926734301762
8.16741814583174	8.60263659628476	9.26905126026682	9.04965401338806	9.29827990667532	9.16495948461408
6.01122725542325	5.86801812314063	6.93203768445511	6.31628493759431	6.30921053263191	6.84206617375814
6.69348695749933	6.32526019507925	6.86087257996518	7.08449558953895	6.8734182221904	7.22579261583046
9.9592775057205	10.0853855291355	9.8989525774893	10.0677073360623	10.1508608945697	10.1059029620415
10.5891829670394	10.6738454823277	10.6459601003922	10.7123837101937	10.6958189884664	10.6818908577981
7.40514146313634	6.96464300743378	6.95503951551079	6.80912331837502	6.70988893746113	7.04120955151415
8.55650605467193	8.2307605990676	8.67413901738152	8.3545918022245	8.49168842181581	8.61583488094318
10.1567151442247	9.8303652546553	10.0604146342956	9.95265382708597	9.7613845864391	9.97599323647058
6.69348695749933	6.5548382607127	6.72108909333658	6.71265337502902	6.62728078439073	6.32197423847032
10.1130909834424	10.1583271244427	9.91866833336202	10.1628718971859	10.3815568257553	10.1417335431622
6.88874324889826	6.69327872885986	6.1263381590892	7.05163612781484	7.38248016556873	6.84206617375814
5.37503943134692	5.63286756818037	6.1263381590892	5.83556340367804	5.9878601721241	6.18057357677894
10.9004894848346	10.7950405030022	10.9489857671088	10.9054585803916	10.8115517936976	10.9423437401092
10.4812949046311	10.47967573869	10.4540828630785	10.3425815227046	10.3255175046137	10.1530680634369
6.72109918870719	6.65686328574097	6.68063072463524	6.46186740938351	6.39591690957464	6.37168927533123
7.54303182025524	7.58383753776763	8.21155362638953	6.60867291269677	6.62728078439073	7.13152796115113
9.56700537024703	9.0144559400122	9.1521747363988	7.71184624081159	7.66914057601817	8.20397897567495
10.8293263358417	10.7393933801868	10.761021708452	10.9354940901661	10.8301441243406	10.8777736813178
11.5776648517648	11.2166746859772	11.4580353516138	11.5376248610741	11.2991164881286	11.5752653989083
10.6595499968799	10.1948800324257	10.4168715856452	10.4008076766991	10.18825215338	10.5784215910074
6.76155123244448	6.12431322141483	6.5671761216006	7.04050091804882	6.49320063679559	6.49660961065129
10.1655351413779	10.0937974334754	10.0574369247523	10.1520215132526	10.0178942775341	10.070507508579
7.17492568250068	7.17487258720753	7.22619575237561	6.89909500763989	6.61301499579721	6.90013429577452
10.2064039139738	10.2465662198815	10.2828345724444	10.3378498696049	10.3815568257553	10.2861364337017
9.56510207836031	9.34286324566417	9.51125693636864	9.89976573148345	9.62371379820237	9.87197145699949
11.163335192082	11.0931936846214	11.195995453226	11.1376140841279	11.0395098522763	11.1899477130925
7.97441458980553	8.28543009306286	7.92619914965728	8.28594274495345	8.32148903174563	8.15617123121219
5.65821148275179	5.49854803987063	5.09930304448597	5.49185772577297	5.04986450203883	5.80197860957365
7.37937836707126	8.25445304032081	7.98538493345899	6.98338891573284	7.3906319951221	7.0920676867889
6.09803208296053	5.97223413077223	5.84654132731114	6.06301587262497	6.34455451542754	6.19900806390525
10.9333218207329	10.8176916475514	10.9322905316488	10.9672389826667	10.849138018621	10.9836333559108
7.92777796208234	7.97347725829136	8.00270151041688	8.21357487837314	8.11756817404881	8.11177771896789
7.66177809777199	7.79493270491376	7.90798567736692	8.28594274495345	8.23653135783767	8.14642085012498
10.97046544078	10.8576811607447	11.0633075578951	10.9060783473039	10.9101986630232	10.9699981952362
7.54303182025524	7.77299361041742	7.55952892354487	7.91249859116686	7.97141640101207	7.69168863784795
10.6406968375701	10.5793940401319	10.5659035867121	10.6899925156495	10.6492025434892	10.6035915911865
5.98868468677217	5.2857253401377	5.79854232372537	5.83556340367804	6.05413939557822	6.18057357677894
4.93073733756289	4.45868139359118	4.70527704434117	4.74853600189173	4.36517316587071	3.94847214598054
4.20945336562895	3.4611352150646	3.46328913025229	4.47347289718894	3.71407883415158	2.69892829650727
4.4262647547021	4.62638436895566	3.08032555527072	4.61806977613308	4.20848780993131	3.56576066593543
3.08746284125034	1.33099539615863	1.78917717231585	3.5085438943729	2.42911544773853	1.57497005349077
6.86418614465428	7.31981669722073	6.88496545138529	2.32291389144078	4.20848780993131	4.25205035649873
7.51963625284321	7.78948017394941	7.44807564601258	7.18853390930524	7.31545745495118	6.83017304666103
9.75572215364228	9.91866954859229	9.7767733870165	9.79154967796734	10.1840301744789	9.88557058810372
8.89330153086056	9.03475131430204	8.96880653990124	9.05213768964049	9.19126581021479	8.98803869367706
6.96000193206808	6.43037352840495	6.86087257996518	7.16836420651001	6.9427749824933	7.39796923731864
4.4262647547021	5.88949310290092	5.38034382929138	5.30064388294993	5.89418241046373	4.44468113392301
7.73131903102506	8.26615014356409	7.99117901790681	7.57668786939968	8.24090677153193	7.55212928255664
4.78135971352466	6.17732640868095	5.38034382929138	3.5085438943729	4.0315319145068	3.56576066593543
4.4262647547021	3.87778550452716	3.76907963919325	3.3412987200248	2.70393463167972	3.56576066593543
9.27961058105248	8.87104374407338	8.94425265722257	8.89986199192536	8.50975601000637	9.04497505735392
11.0831468708167	11.0168557751693	11.1995212353956	11.156754963204	11.0212761290984	11.1023072943128
9.69783635796238	9.74015279516942	9.73683717376168	9.67845770408511	9.65673442166788	9.80520867812778
6.27612440527424	6.97447295053747	6.61071743729548	6.44451369223554	7.06146762038611	6.32197423847032
3.08746284125034	4.72794523364979	3.67380846999506	4.47347289718894	4.85733705373553	4.61503258219888
0.584962500721156	3.03919762325003	1.40621359733427	4.86738918387135	4.12286597339084	4.10805902261312
5.4757334309664	4.33452438750865	5.50354968015174	4.92307296753624	4.4372689337294	5.14905748229743
3.39231742277876	2.43156056860666	0.893482945537092	2.92686429600143	2.93271575547781	2.48789179165415
9.44811630540946	9.59511015759254	9.49409878325259	9.44674013634384	9.63164837034782	9.38544582641967
7.73131903102506	7.44413642726614	7.96198574243047	7.88900405289794	7.66249248858734	7.86131358349375
7.79766152585376	7.92475167748854	8.22152971684051	8.92192593907754	9.25105097400379	9.07394409140556
7.42206476617281	7.4229868385329	7.25459115238435	8.96763602283985	9.29423708950651	9.13774036053114
7.10328780841202	7.49901705467061	7.6049072356582	8.86321238077718	9.1648224466731	8.9769399412557
7.72451385311995	8.21070499324537	8.39075835898949	8.95168099818432	9.2779454080563	9.10746234711114
9.64475759251626	9.44328977556364	9.76778844132864	10.5519971764803	10.4389078373815	10.5961784947486
10.44759985828	10.4620724011483	10.4344275675443	10.8374252068424	10.8142233445499	10.9260929997229
10.6746336617673	10.7880453595827	10.7411698831208	11.0045936389079	11.0332693540982	10.9591438299897
7.1548181090521	6.75193635743088	7.25459115238435	8.57039251860851	8.45855366065569	8.67511136153464
6.48381577726426	6.44476382237239	6.63906881088638	8.19485348716605	8.50975601000637	8.65446122575676
4.78135971352466	4.72794523364979	4.02364373213252	6.88660690329318	7.10219934598848	6.78161755733889
4.78135971352466	4.62638436895566	4.30797131761662	7.88306529894841	7.60116119604586	7.84939642961603
3.75488750216347	4.12475355267435	3.76907963919325	6.29691912849157	6.5840297165731	6.14299855645079
5.14974711950468	5.52646589352974	4.60192609813369	5.65910290012106	5.81946370032106	5.59646548109213
4.7279204545632	5.2184426217989	4.8482420390064	5.69017912492378	6.17778753197355	5.67692578483052
6.53138146051631	5.97223413077223	7.00002705944508	5.86283409386407	5.25776334086864	6.3387328252581
3.24792751344359	2.43156056860666	3.08032555527072	3.3412987200248	2.08493950349443	1.57497005349077
4.04439411935845	3.19445149801781	4.24170686140998	3.7908987903721	4.12286597339084	3.19513728444974
9.31174831500496	8.85585759807042	8.86812399295	8.99381154034737	8.71289390866126	9.12267905752995
10.7834075421735	10.5756875957025	10.6720694058165	10.7259241627769	10.5501121138719	10.6713349659015
9.02097993890421	9.06355551096407	9.13042460980983	9.1999755027551	9.23634757625133	9.15264939838456
3.95419631038688	4.04718658977498	3.85874328642841	4.80928361895612	4.95698123108756	4.50367859178255
5.18982455888002	5.75538881686638	4.37147393822559	4.02387282684165	4.95698123108756	4.50367859178255
10.8403845507117	10.7341023199705	10.8118211582492	10.7882622713653	10.7514192649	10.8134568358694
8.4241662888181	8.3599923384713	8.43892980145446	8.68294671422891	8.66566497598973	8.65099124823275
5.98868468677217	7.4229868385329	7.08620365167145	5.75024395329723	6.32699654004143	6.52625361916601
6.70735913208088	6.97447295053747	6.63906881088638	6.31628493759431	6.88522435842188	6.56963144539095
7.08214904135387	7.68750693179316	7.36315995360307	7.69824594590439	8.17376080808044	8.10172834606186
6.01122725542325	5.82405082993398	5.89307448108856	7.04050091804882	7.10219934598848	7.60249114398081
4.28540221886225	4.04718658977498	3.67380846999506	4.47347289718894	5.09404585999761	6.78161755733889
3.39231742277876	3.57752311304631	1.40621359733427	5.0774233017496	5.13684632212839	6.71858489623035
7.2045711442492	7.4229868385329	7.23571979821519	7.54640402499523	7.39873558871532	7.48474366263112
6.11894107272351	6.17732640868095	6.1458748673797	5.12515042661382	6.30921053263191	5.67692578483052
10.9266666293473	10.8643367033374	10.8662498860319	10.8229971973837	10.9281211193153	10.8884796431619
0.584962500721156	-0.915532320729043	-1.55904674355704	1.87331382109348	-0.579990908764658	-1.29474102694147
5.14974711950468	5.63286756818037	4.75443751320717	4.74853600189173	5.47162598030879	4.99160250306151
5.33985000288462	5.18354465032151	5.72358414524602	4.68489457224183	4.12286597339084	4.81530451540871
5.10852445677817	6.41583333284508	6.00354619900992	5.52702337209689	5.96503458838781	5.22189894279918
6.48381577726426	6.63204758944358	6.0247110166559	5.21577616260693	5.9878601721241	5.07243038899704
6.74819284958946	7.77299361041742	7.23571979821519	6.23707849767554	7.19902434535658	6.61176973402048
4.83289001416474	6.03122232295202	5.38034382929138	4.12670951213927	5.59764616773689	4.50367859178255
9.6008421143873	9.70320176873279	9.65173701530708	9.54464271055941	9.48832343010953	9.53012439862153
5.18982455888002	4.7760826298145	4.97893715627328	2.32291389144078	3.30010417612872	1.57497005349077
6.48381577726426	6.26143896928177	7.09664096900892	6.31628493759431	5.62741915164244	6.43547174636767
4.7279204545632	4.8226151437651	4.24170686140998	5.75024395329723	4.85733705373553	5.38966369491998
6.467605550083	6.19455929610622	6.06617867405699	6.94791203259644	6.19735219787322	6.70564849953041
7.39660478118186	7.11417406103895	7.40620921121129	8.49349303765094	8.39759212747133	8.21802422247879
7.19475685442225	6.75193635743088	7.43979387359579	7.70506339660686	7.46189390751922	7.77579746863928
8.64925617751731	8.4445082062555	8.38183392719216	8.36293015963626	8.27966888699486	8.49734791523129
8.13699111208023	7.81653230266823	7.705813089482	7.85904276539888	7.2175941664345	7.9533349938875
8.15734693536284	7.98776932327401	7.85200149808137	8.34620108429758	8.31322654320571	8.27738708803178
9.75905593916017	9.39916208866503	9.47674523059894	9.91935871359547	9.60609421418845	9.97032387910953
10.6895612542855	10.4523761804953	10.4825348168303	10.7835166945489	10.5509210349358	10.608205924636
6.27612440527424	6.08781843278933	6.203025654386	6.17443183258981	6.46153440933915	6.06484836488198
7.1548181090521	6.76337778339134	6.89687053048382	7.26629941150682	6.95400048240409	7.27075767726021
9.73555602391153	9.82909860651761	9.89564167477696	9.54120549338664	9.55518355229732	9.56604932323664
6.51569983828404	6.27766992137209	6.78622047587905	6.78226377201965	6.11735846509505	6.6255524489885
6.13955135239879	6.17732640868095	6.06617867405699	6.21652090082305	5.13684632212839	6.25296797709771
5.10852445677817	4.3979828674226	4.75443751320717	5.96667019389722	5.74043196766772	5.91725130849765
5.3037807481771	5.41127924015914	5.50354968015174	6.21652090082305	6.2544230940051	6.3387328252581
10.9690267021508	11.0952415062276	11.083202342976	11.045964149884	11.047411397583	11.0147337415287
9.38478375009335	9.19928267955875	9.19213792809546	9.50810323819069	9.18908159392821	9.48148081445272
4.35755200461808	4.33452438750865	3.57218132756176	4.47347289718894	3.93366862599012	3.86169772066807
5.5077946401987	4.91127008674041	4.93660547935903	4.39484919493275	4.28907007014501	3.76949646396102
5.53915881110803	4.99462895069659	5.72358414524602	5.59469441107059	5.00421016375909	5.65059044630124
10.0505289055306	9.90433467393449	9.88232565449822	9.981431157577	9.9189254809485	9.91092063194639
10.554109152574	10.6738454823277	10.522594316453	10.5799692567694	10.6071664964346	10.5689892610126
7.92777796208234	8.00191653375406	8.08100788712781	7.8345804357235	7.68234071022515	7.7883218731493
5.18982455888002	5.25248933778294	6.00354619900992	3.91245686687681	4.0315319145068	4.38322475132988
10.5966556676747	10.675919548314	10.7506553938228	10.7780724601202	10.8327796860323	10.6958488657376
6.45121111183233	6.79714990218726	5.96031372854794	6.98338891573284	7.52226746599461	7.2348959766337
3.39231742277876	3.19445149801781	3.08032555527072	4.80928361895612	4.28907007014501	4.18181137861468
2.4594316186373	2.43156056860666	1.78917717231585	1.87331382109348	3.30010417612872	3.32929698347301
10.118292233027	10.0737357591823	10.098604490112	9.96774538446621	9.94811896486808	9.76658808108394
8.79279029430106	8.68842532438858	8.43892980145446	9.27974118993012	9.23423414478037	8.98249975846225
9.14593214582051	9.4893018193597	9.25649894568463	9.20883198879223	9.31632633163147	9.24372644420678
5.44294349584873	5.18354465032151	5.02012459256767	5.41862200436187	5.56721150809851	5.1859278968944
10.7891260464252	10.6848717250156	10.6908702969697	10.7841956668394	10.698725868457	10.7062313534482
8.43254190038826	9.23658599223662	8.90030771031206	8.15174596046956	8.83424676265744	8.29959744408869
7.81057163474115	7.92970149172496	8.41722227805144	7.90080295904539	7.83154971829302	7.89649791078431
10.2366122002158	10.4360646171137	10.5214956557177	10.2303027712631	10.17873433137	10.2700000032741
9.08613622502731	9.21314225876215	9.47456207496209	9.27344816053185	9.36331890435148	9.26678773926557
8.56414948998573	8.41341133757025	8.85833482197988	8.50848581698013	8.60340410369331	8.69210163894442
6.82654848729092	6.5008857996807	6.76050100671076	6.33537408280267	6.17778753197355	6.93390843830975
6.63662462054365	6.6194723138318	7.15780673343531	6.76862878188125	6.69646232676589	6.92273611391144
10.5731737846865	10.4876044515842	10.5530395578113	10.6296513757452	10.5891978550991	10.5150234704428
6.21916852046216	6.78598307341492	6.49172296812844	6.74093416483915	6.62728078439073	6.71858489623035
4.55458885167764	3.33415260851929	4.54749737035094	5.41862200436187	4.28907007014501	4.86139388414393
6.40087943628218	6.40114007978326	6.31127297552255	6.25732460377796	6.44542241972027	6.18057357677894
6.66533591718518	7.05995962916173	7.24518468810899	8.54161687221572	8.43979304780797	8.55778104751783
5.65821148275179	5.2857253401377	6.00354619900992	6.33537408280267	6.17778753197355	6.46635747769103
6.45121111183233	5.88949310290092	6.79891923581658	6.94791203259644	6.4126183765819	6.86556850012359
6.36632221424582	6.47310685000737	6.95503951551079	6.94791203259644	7.0717646863501	7.08203540478505
8.97297978606629	9.09177731208607	8.80503654111387	8.74681633607595	9.12417468173113	8.6015342620492
10.297489501161	10.3436524739731	10.012058612639	10.3149017431259	10.3861248864329	10.1568269603759
6.38370429247405	6.58105210439633	6.203025654386	6.62403190293711	6.90853561608389	6.73140880110031
9.14593214582051	9.44328977556364	9.32308517613601	9.33909291505341	9.45632838662879	9.16250567411899
4.55458885167764	3.87778550452716	4.93660547935903	3.15008487720176	2.93271575547781	2.88351136082358
6.38370429247405	7.24922516491679	6.37938900227762	5.38044176580813	5.81946370032106	5.54027812272484
10.0854724591813	10.0662713234692	10.1639118752229	9.97398357244959	10.1246181117758	10.0095591751743
5.44294349584873	6.21158202112632	5.67148189482185	4.39484919493275	5.25776334086864	4.81530451540871
8.74986942739684	9.08099019385679	8.66673272151956	8.97816784042867	9.18470268269506	8.77423532165713
7.78463484555752	7.82720804229464	7.91408105498961	8.11222463409827	7.96073795843915	7.84939642961603
9.15355203170811	9.4298600036379	9.3705977505156	9.6923606699164	9.65362368024775	9.34260360471361
7.10328780841202	7.85354554350421	7.50482101427022	8.25024867095097	8.34192975929128	8.07630116845256
6.57742882803575	6.01183525918843	6.49172296812844	6.83545357798999	6.23566248115739	6.84206617375814
6.43462822763672	5.86801812314063	6.73433998008457	6.88660690329318	6.17778753197355	6.92273611391144
6.82654848729092	5.97223413077223	6.25811029194919	6.9114674797308	6.49320063679559	6.85386415481949
9.18115225686557	9.16299871496577	9.22337063284051	9.31485247814532	9.10106015292279	9.18927561286427
10.9516489859046	10.7314492497454	10.9605645437047	10.92331612992	10.7437135992841	10.8631187199365
10.3503867423128	10.3662577639967	10.4332634403877	10.426780549207	10.4897317174075	10.4812682761251
4.93073733756289	5.18354465032151	4.80206146329021	5.77929330256666	5.65655861948655	5.03257013096887
3.08746284125034	1.80065887288731	2.92781414019725	3.5085438943729	2.42911544773853	1.94559343497647
6.05528243550119	6.95474334783916	6.32858955248043	5.80772453343067	6.88522435842188	5.98232391302184
5.4757334309664	6.142208930024	5.31479211508739	5.12515042661382	5.43822180424171	4.90608638820704
6.48381577726426	7.05995962916173	6.62495905846883	6.88660690329318	7.10219934598848	6.74412215369096
6.96000193206808	7.76745453111715	7.22619575237561	7.23766508493408	7.66249248858734	7.102032182586
4.4262647547021	4.62638436895566	4.02364373213252	4.74853600189173	4.20848780993131	4.50367859178255
9.96938652134228	9.86290101716849	9.91703506163666	10.2043660594492	10.0474105778278	10.2024156960698
11.182704710519	11.1190810279632	11.1910456128565	11.1811846808333	11.1111846632674	11.1930498172386
8.80574387215162	8.33803886651841	8.69249878614731	8.79279165463599	8.52048324491653	8.82140585993878
5.79441586635011	6.03122232295202	6.18421254661903	5.72054901037392	5.68509097069813	5.87221758745769
4.97727992349992	6.26143896928177	5.72358414524602	4.86738918387135	6.07553832034428	5.25701345331335
3.52356195605701	4.19823610548472	4.09985173013969	4.02387282684165	4.12286597339084	4.31909552746624
7.13442632022093	7.77299361041742	7.34559385275829	5.88955933351121	6.88522435842188	6.21721495895313
8.5018371849023	8.38873664691168	8.61769395801265	8.8546100928754	8.78522772681108	8.94882203005362
9.89860138740394	10.1831295920607	9.996627165588	10.0583916211948	10.2520812219567	10.1149425510899
4.97727992349992	6.32526019507925	5.24629328549821	5.21577616260693	5.68509097069813	4.86139388414393
7.65463602852797	7.45806019510893	8.01982351497702	7.67062289628403	7.64235237089229	8.00806260088558
7.11374216604919	6.87291208584333	7.23571979821519	7.17848711431192	6.81281084037119	7.30576798061159
5.68650052718322	5.38093356346908	6.32858955248043	5.88955933351121	5.29580754618006	5.9392627584252
2.70043971814109	2.15145515053493	2.7583238043547	3.15008487720176	2.08493950349443	1.94559343497647
5.62935662007961	5.2184426217989	5.72358414524602	4.54772630139037	4.4372689337294	4.18181137861468
7.08214904135387	6.77472618859958	7.08620365167145	6.57741493905821	6.52415118166912	6.73140880110031
10.333714426094	10.2661606386946	10.2905275246209	10.3529325546289	10.3245638114544	10.389067019418
5.14974711950468	5.31818834169633	5.77396368807613	3.7908987903721	4.36517316587071	4.25205035649873
8.19721669311005	8.50142108846799	8.28959140652563	8.31641156367077	8.50975601000637	8.42221087338691
2.4594316186373	1.80065887288731	0.893482945537092	7.25682265235757	7.17068878306963	7.33996637721545
10.4833119549994	10.2094303325435	10.4575252795437	10.537380249257	10.3751358339193	10.6183069214356
8.25502856981873	8.11454584002831	8.57886784818334	8.47068365126941	8.37797140044199	8.56147713909493
8.96434086779242	9.09392476812803	8.95657905303985	8.8546100928754	9.17810795090811	8.80584938902916
10.0035179121086	10.2180882620018	10.0074455645937	9.0346542213862	9.34393424495506	8.89681798206418
6.4178525148859	5.63286756818037	6.06617867405699	5.86283409386407	5.3688650439388	5.77780200635968
7.2045711442492	7.10528329115956	6.88496545138529	6.59313532554514	6.84949615855455	7.00983092587895
10.6913073301911	10.652231049092	10.5975964248901	10.5390122707595	10.5765574116593	10.3965313725705
8.47370574961942	8.8092819505284	8.29433858286916	8.10215891840831	8.27541576767158	7.88486282268193
6.63662462054365	6.66910762874577	7.26393990792679	6.76862878188125	6.2544230940051	7.24394348824623
4.97727992349992	5.31818834169633	5.86998551855742	4.61806977613308	4.4372689337294	4.86139388414393
9.29117069932186	9.25391396009682	9.30121146505039	9.49925408373535	9.38432982767269	9.35558745762602
3.64385618977472	3.4611352150646	2.92781414019725	4.02387282684165	4.4372689337294	5.14905748229743
4.78135971352466	5.25248933778294	4.49105231098207	6.40911513368528	6.98713524356421	5.84917430976909
6.45121111183233	6.40114007978326	6.76050100671076	6.94791203259644	6.70988893746113	7.32296630692175
5.89481776330794	4.86764634415128	5.17456981801981	6.0860546750644	5.62741915164244	6.14299855645079
10.1208858427878	10.1502963441347	10.098604490112	10.1864370639749	10.2081307018598	10.148041250671
8.20212382383046	8.71682602238221	8.48979991728644	8.47833012386167	8.70045792471621	8.32581573048937
5.4093909361377	5.97223413077223	5.56160784027874	5.56128723506343	6.15793931033575	5.14905748229743
7.40514146313634	7.79493270491376	7.2069672023013	5.91576051493452	6.49320063679559	6.04464613434075
7.41362792902417	7.37970131890447	7.30984224520264	7.02927213399475	7.15146736829246	7.28836671951592
10.527965641134	10.5064516057929	10.6204259511161	10.4169881057603	10.452009053252	10.3599167484453
7.44708322620965	7.37970131890447	7.37186764800541	7.44295460671009	7.2894534460658	7.04120955151415
10.7972562175098	10.515005564413	10.7591421616532	10.7173882757408	10.5805200976457	10.666028550219
8.60177078840771	8.9205031662668	8.97488368603698	8.59856151834455	8.66886475156076	8.66826006109433
7.18487534290828	7.57111903381145	7.45631265187339	7.20840367973258	7.65581197133343	6.97777010304536
4.61470984411521	4.2680429586017	3.57218132756176	4.92307296753624	4.36517316587071	4.10805902261312
5.02236781302845	4.57269135888201	4.75443751320717	5.12515042661382	5.29580754618006	4.94946421443198
9.68211676495007	9.42309635066106	9.41440258992988	9.31688939536766	9.01694140702177	9.58461142816927
11.1296050111525	11.0792917452524	11.1544888451015	11.1927341706621	11.1859223879844	11.2567306295777
10.2638560195961	10.1083973769103	10.0693130092095	10.447900000072	10.3331232350758	10.3145195224078
6.97154355395077	6.97447295053747	6.47617342122666	6.56150740071845	6.53936804179348	6.87718068427232
6.53138146051631	6.15987810458764	6.1263381590892	6.42693163015787	5.96503458838781	6.51150609859604
4.35755200461808	3.57752311304631	3.67380846999506	4.22219422599246	2.08493950349443	3.86169772066807
6.876516946565	6.66910762874577	7.10700728363812	5.94145779612026	6.05413939557822	6.45099546620676
4.55458885167764	3.4611352150646	3.21895220572771	3.15008487720176	3.12869283613752	4.03042321534228
7.4797802640291	7.24115666758426	7.75386615495354	6.59313532554514	6.27293017728827	6.85386415481949
5.3037807481771	4.33452438750865	4.75443751320717	4.31130840363534	3.82827022453651	4.86139388414393
10.6334493747135	10.7842149995703	10.6007297550699	10.6812232146814	10.713886576657	10.608205924636
8.01959072835788	8.30444736476769	7.90186582025035	8.2947192457278	8.46968789533002	8.36428938464992
3.64385618977472	5.18354465032151	4.54749737035094	3.5085438943729	4.12286597339084	3.19513728444974
8.29691620687929	9.07665189618599	8.99895277278411	8.45137381466416	8.91401950411171	8.62999815683791
8.91438513215544	8.48159808806876	8.55108870230245	8.58455124646424	8.58992794751106	8.72550600633676
7.24317398347295	6.93473087383124	6.9435820000762	7.14788537748583	7.05109254560326	7.36510459555128
10.8181827049486	10.7459791256046	10.7258691722171	10.824315291142	10.7879507092446	10.8349455990802
6.40087943628218	7.28104069955878	6.82400362731973	6.39105786646756	6.99800437459596	6.58381174471598
3.24792751344359	3.96505430423864	2.92781414019725	3.91245686687681	3.71407883415158	3.76949646396102
9.88340698638837	10.0853855291355	9.90060533510672	9.94504364549527	9.94811896486808	9.89904546145077
3.64385618977472	2.15145515053493	2.34953177419607	4.12670951213927	3.12869283613752	3.45226315803808
5.62935662007961	5.60701782661654	6.00354619900992	6.63921635541942	6.64139950037998	6.65273736192784
10.3492812288175	10.2475055511094	10.3653936175223	10.4044202978631	10.3321748255356	10.2757833038909
6.8008998999203	5.86801812314063	6.87296663054156	5.91576051493452	5.3688650439388	6.51150609859604
10.0409745988173	10.2484442506417	9.95735070336435	10.0120235523974	10.1190869922969	9.82100679136144
9.83999107053989	10.0937974334754	9.8261329208565	10.0156480142194	10.084286264876	9.86130697005985
5.02236781302845	4.7760826298145	5.02012459256767	5.3411384194437	4.69279901962163	4.81530451540871
7.82972273508606	7.89973584393786	7.90798567736692	7.98060084190359	7.98201222424631	8.00268033298683
10.706064267335	10.6599390544579	10.6928359113976	10.7407320009796	10.806193006439	10.6464066853766
5.84549005094437	4.91127008674041	4.97893715627328	6.21652090082305	5.94182211198099	5.91725130849765
9.20823435833979	8.69985503944434	9.08597026690138	7.59157624001969	7.64235237089229	7.95890005621706
5.74146698640115	6.64451058431028	6.06617867405699	6.23707849767554	6.34455451542754	5.84917430976909
10.3907063728728	10.4228767195272	10.3568464023117	10.2374757348637	10.2277248336222	10.2072608413473
3.08746284125034	4.95357169221723	3.08032555527072	3.91245686687681	4.4372689337294	3.32929698347301
9.85408917987057	9.75225558329189	9.79635574307658	9.8155881002926	9.8759213676301	9.85671276146173
6.99435343685886	7.01311475802897	7.35440221470533	7.00652745822151	7.33252313772935	7.38162846329236
10.9783529581651	11.0552833302485	10.9381546931558	11.0074684623901	11.08076811021	10.9275777617585
7.62570884306447	7.85354554350421	7.76060883132575	7.67062289628403	7.70190537612481	7.49998658662637
8.77643303244473	8.96120825405086	9.12218760394902	8.63973193620786	8.63979401404407	8.78061258464277
7.95710204156229	7.99250100967602	8.1502853791631	7.85296903930906	7.63557263763331	7.91378021521461
9.3454052467178	9.16911191956311	9.35413633022453	9.29844438323399	9.21291848768148	9.26220423979566
10.5328429109613	10.5072314081327	10.7373590843261	10.5283683255631	10.4615375777977	10.6219629252103
5.98868468677217	5.80153669423368	5.86998551855742	5.80772453343067	6.09660801779427	5.87221758745769
9.14593214582051	9.55405289911318	9.45033863697744	8.97027676962643	9.26145758427138	8.9769399412557
4.97727992349992	6.106185094514	5.28092755757435	6.76862878188125	7.26294610265474	6.94499675947448
8.79279029430106	9.15890832038457	8.85177359602463	8.67309740104165	9.01694140702177	8.48961662744673
7.42206476617281	7.54532899482042	7.97956873413145	7.67062289628403	7.68234071022515	7.60954732857789
9.12541347048331	9.15685861935259	9.13589131477188	8.98078787546242	9.21720824317448	9.0817469655206
10.2137117981057	10.1742513887253	10.2866859031563	10.2282462607547	10.3264705341033	10.1841032947875
4.04439411935845	3.68494888616691	3.67380846999506	5.62728669610016	5.8697263441223	5.54027812272484
6.467605550083	5.95200412229863	6.86087257996518	6.60867291269677	6.29119049209987	6.75672684381965
4.97727992349992	4.2680429586017	5.44319159712969	6.42693163015787	6.34455451542754	5.96095049880477
10.0867996856235	10.0801022292929	10.085492954762	10.0360029745532	10.0155052611038	9.91682254984777
7.56605403817109	7.65780695704682	7.6049072356582	6.51261594297227	6.46153440933915	6.04464613434075
9.29117069932186	9.49896726699457	9.54500430588665	9.25011678709829	9.4068890747062	9.29399354878778
10.518161355757	10.4401604127518	10.522594316453	10.5381965091719	10.4493988174147	10.4332967323544
6.13955135239879	5.99217512922317	6.32858955248043	5.3411384194437	5.43822180424171	5.29131127280994
6.13955135239879	5.84620758327249	6.53744166845308	6.33537408280267	5.89418241046373	6.3387328252581
5.33985000288462	4.2680429586017	5.82273080578509	5.30064388294993	4.95698123108756	5.11124157014134
10.6215940390175	10.7120621859818	10.5733577571436	10.7308783644658	10.9194981780777	10.7113953147233
10.3624918060461	10.5712268318999	10.4517835908597	10.3789244045727	10.4675668474415	10.3718624230691
10.0230612497353	10.0906489069857	10.0364284253531	10.0010908032705	10.246032614459	10.1692878690485
6.17990909001493	6.26143896928177	6.32858955248043	6.46186740938351	6.68290277716974	6.23519981315784
10.1617617433047	10.1135748537365	10.1996232001265	10.0395630586461	10.0682751877278	10.0026289943416
9.84470576441194	10.0327261193756	9.94456537509464	9.981431157577	10.0717219260943	9.99147251736321
5.2667865406949	6.08781843278933	5.77396368807613	5.62728669610016	5.9878601721241	6.18057357677894
10.1130909834424	9.91152051298053	10.0074455645937	10.080411314063	9.96434845578415	10.0137017053345
7.21431912080077	7.00355413057037	7.58238698774818	6.65423019246572	6.52415118166912	6.98853467468865
7.25266543245025	7.3500801298528	6.9435820000762	7.44295460671009	7.24498514591931	7.46934154072806
9.98370619265935	9.99160347364598	9.86720471304568	10.1289448161638	10.1454349630609	10.1303112331297
10.1286388128526	10.3081441388482	10.2171698518025	10.2435934904069	10.276011994468	10.198771362006
6.467605550083	6.9939275672291	6.31127297552255	6.9114674797308	7.01948722014893	6.49660961065129
5.2667865406949	5.93147660305459	5.38034382929138	5.62728669610016	5.4039824378323	5.25701345331335
8.73301532168596	9.14862958356938	8.91299325598664	9.09366881416733	9.27589525300068	8.97972246994404
10.9531051505913	10.9712034671786	10.8415073381248	10.9778509572182	10.9584815584455	10.8094428438232
7.39660478118186	7.05995962916173	7.52850816023713	6.76862878188125	6.74939658064254	7.26187367589174
10.7469341363723	10.7603593114836	10.6570609879692	10.7546837585211	10.6574571090469	10.5952492321046
7.26209484537018	7.33503042986567	7.52850816023713	6.60867291269677	6.29119049209987	6.58381174471598
6.82654848729092	6.48706542784921	7.16776652296875	5.88955933351121	6.17778753197355	6.30502302003059
8.32867492732795	8.00660058563935	8.79483220137091	8.00798330502004	7.85491068253706	8.65792305778613
5.91886323727459	5.34991348350369	6.32858955248043	5.99141566847939	5.25776334086864	6.21721495895313
6.99435343685886	6.19455929610622	6.52235399694284	6.46186740938351	6.15793931033575	6.48156111510289
9.89860138740394	9.90433467393449	9.83650511545998	9.8501712272717	9.85188266192168	9.76168860891199
9.21795769786411	9.24238591534013	9.17361878243071	9.41874573033583	9.58005415083223	9.31628784740121
10.4537850554962	10.4466887901684	10.377521356617	10.3042506781583	10.2640988784933	10.243100752647
0.584962500721156	2.86448913179062	0.893482945537092	8.26821489037367	8.45108022698606	8.07116269716572
7.40514146313634	7.24922516491679	6.74747663362919	7.85904276539888	8.09831297711431	7.66481336529972
10.2197735508929	10.1432313087599	9.98103784933127	10.2179159623829	10.2328349265713	10.0274266975341
10.418379719365	10.3135283158305	10.4297657134338	10.141082299973	10.0659725334293	10.0585176883307
4.55458885167764	4.8226151437651	4.54749737035094	4.92307296753624	4.4372689337294	5.22189894279918
6.11894107272351	6.15987810458764	6.52235399694284	5.96667019389722	6.37900924641066	6.38789536992662
2.70043971814109	3.03919762325003	2.0949676812568	5.12515042661382	5.13684632212839	3.67114404185098
6.467605550083	6.65686328574097	6.42854947114361	7.76490402742289	8.19651055581912	7.48474366263112
8.10590850857116	8.43421936739623	7.82644379418854	8.39171134023506	8.79108657348534	8.40178478829786
5.18982455888002	5.44097921490548	5.41209169373501	6.63921635541942	6.70988893746113	6.43547174636767
5.98868468677217	5.58068032540697	5.84654132731114	6.29691912849157	5.65655861948655	6.43547174636767
6.29462074889163	5.99217512922317	6.70772196925571	6.42693163015787	6.23566248115739	6.73140880110031
10.2330204264745	10.306344788097	10.4168715856452	10.2001690636497	10.2307931769253	10.3346223068489
7.59618975614441	7.78948017394941	7.92619914965728	8.15660493832964	8.18290610631489	8.21335732058626
5.02236781302845	4.51685006650366	4.54749737035094	5.45574154237242	5.29580754618006	4.99160250306151
8.5980525001616	8.52742130286109	9.01380515521388	7.96948878252892	8.01846503505301	8.28185599983732
2.70043971814109	3.19445149801781	3.46328913025229	2.65872461320796	2.70393463167972	3.45226315803808
4.4262647547021	5.03451298267111	4.49105231098207	5.12515042661382	5.62741915164244	5.48186495162704
3.52356195605701	1.80065887288731	0.893482945537092	3.5085438943729	3.30010417612872	2.48789179165415
5.89481776330794	6.5008857996807	6.41233822916855	5.41862200436187	5.62741915164244	5.62377625728727
4.61470984411521	5.2184426217989	4.80206146329021	4.12670951213927	4.12286597339084	4.18181137861468
8.27844945822048	8.35635732039628	8.23637245471355	8.79580115464488	8.85950471197622	8.67511136153464
10.171802288683	10.0217308191031	9.98103784933127	10.2137613770255	10.2070916249348	10.127760882702
10.6666678406904	10.4844383687934	10.4471746123022	10.4866211800231	10.4710002640224	10.4972493578608
10.6406968375701	10.6108696184275	10.5192959550486	10.6746082633544	10.5939081033241	10.6155589583412
7.2336196767597	6.97447295053747	6.95503951551079	7.33081899279539	7.20834073040967	7.30576798061159
2.16992500144231	2.43156056860666	2.92781414019725	1.87331382109348	1.62413965788592	2.69892829650727
10.4517262680745	10.3445287113854	10.3726818372691	10.3302442001823	10.1850868900571	10.3178890739895
6.66533591718518	7.10528329115956	7.02203238586795	5.59469441107059	6.01031154906213	6.23519981315784
6.40087943628218	6.21158202112632	6.5671761216006	6.83545357798999	6.5840297165731	6.85386415481949
9.3409627642517	9.84296891727904	9.38456737354924	9.99620294253315	10.2809453691163	10.0123221544693
4.28540221886225	4.19823610548472	3.76907963919325	6.23707849767554	6.50876334201068	5.91725130849765
4.12928301694497	2.43156056860666	2.92781414019725	4.22219422599246	3.12869283613752	3.86169772066807
5.53915881110803	4.95357169221723	4.70527704434117	5.88955933351121	5.29580754618006	5.96095049880477
7.51963625284321	6.86233744320776	7.51275771124226	7.59157624001969	6.97617915856038	7.84939642961603
8.95274124718649	8.827579821284	9.13042460980983	7.73199060382378	7.55148464497314	7.98641465595551
9.99647348873323	9.5432083128628	9.90060533510672	10.0431136828055	9.58497452733963	9.93293208187394
8.67065624911844	8.31947680904691	8.5945172013711	9.10564216882528	8.84271794423264	9.16985489082656
3.75488750216347	3.19445149801781	2.92781414019725	4.61806977613308	3.58949268174602	4.10805902261312
4.49185309632967	4.57269135888201	5.06022802214812	4.61806977613308	4.69279901962163	5.03257013096887
5.94251450533924	6.05034380213564	6.47617342122666	8.00255151933248	8.15528493499147	8.12175907529259
6.85174904141606	6.72876825457695	6.82400362731973	8.31641156367077	8.37004371797799	8.25937477535222
5.14974711950468	4.91127008674041	4.75443751320717	6.46186740938351	6.64139950037998	6.59785699151982
9.56890615450208	9.91866954859229	9.65562189280669	9.22419097903257	9.62689314570433	9.2320591383571
7.2807707701306	8.19853183918631	7.6197379354353	8.20891906377047	8.48073233681198	8.01876856272967
6.19967234483636	6.29371430666266	6.61071743729548	7.16836420651001	7.23591555435177	7.102032182586
6.25738784269265	6.6194723138318	6.04558589616204	6.44451369223554	6.88522435842188	5.75322244125582
8.64925617751731	8.58111431293473	8.63295158108712	6.0395728601124	6.19735219787322	6.58381174471598
4.4262647547021	4.3979828674226	4.54749737035094	6.06301587262497	5.50423474277931	5.35760287208639
8.47775826644389	8.51448173254524	8.42158859156564	9.26712535328109	9.3900045733118	9.29399354878778
10.5082899861403	10.6465983709741	10.4712177029949	10.8308863269518	10.9975536786791	10.8309897496929
7.81698362325538	7.43007236720918	7.97956873413145	8.33351538041795	8.20101550501748	8.3810718106244
5.79441586635011	5.14775176222301	5.13740108818874	7.33978692873326	7.29817642664819	6.87718068427232
5.79441586635011	6.24501706043451	6.18421254661903	6.74093416483915	7.37427952237389	6.38789536992662
5.4757334309664	5.52646589352974	5.6175349382647	6.49591300749508	6.39591690957464	6.71858489623035
-1	-0.915532320729043	0.115065214379401	6.25732460377796	6.2544230940051	4.99160250306151
5.94251450533924	7.28888255249837	6.4604635668925	9.33708959018175	9.75561521162372	9.03161681595371
5.18982455888002	6.22839964808162	6.06617867405699	6.84842666473945	7.23591555435177	6.78161755733889
4.55458885167764	5.70766293195228	5.09930304448597	7.84073813067194	7.99775381504718	7.41413093076489
9.4948555844912	9.57852863682412	9.38919559995862	9.8267523840512	9.94560496081857	9.81786067866464
5.82017896241519	6.68124549785499	6.06617867405699	6.65423019246572	6.50876334201068	5.98232391302184
5.10852445677817	5.25248933778294	5.21085349344884	6.62403190293711	6.81281084037119	6.63920754439325
1.32192809488736	1.33099539615863	0.115065214379401	4.86738918387135	5.84482559774728	4.81530451540871
8.04712391211403	8.45810973801399	8.34101428004427	8.84595206621831	9.08700182600319	8.71888539020133
7.37937836707126	7.77299361041742	7.52065328524758	7.09527159503148	6.93145670880421	6.45099546620676
6.78790255939143	7.39427947911068	6.90868332121957	7.24727820149798	7.2175941664345	6.6255524489885
7.36194377373524	7.32744429080199	7.22619575237561	6.74093416483915	6.52415118166912	6.70564849953041
6.63662462054365	6.47310685000737	6.1263381590892	5.86283409386407	5.76728583436149	5.62377625728727
10.3009244909763	10.225739373461	10.2265350231734	10.1574577186315	10.105720444663	10.1392028865698
9.53818893205242	9.77878077391305	9.5922430947092	9.70459857974389	9.89694053624159	9.57350222484646
10.1978309980122	10.2587284952023	9.9888524427336	10.3510565031602	10.379725326557	10.4176522458189
7.10328780841202	7.45111567256605	6.68063072463524	8.31641156367077	8.61674894323248	8.21802422247879
5.5077946401987	5.553836302863	6.10654772022759	5.41862200436187	6.21664129592218	6.10444107215337
4.83289001416474	4.62638436895566	5.50354968015174	4.39484919493275	4.4372689337294	4.94946421443198
6.82654848729092	6.38629051258573	7.26393990792679	6.80912331837502	6.42911861619703	7.29709301578948
10.8730595476615	10.946951792684	10.9996082775721	10.9965110719665	10.9421705629554	10.9822039981374
9.82892982765149	9.75493090016636	9.86720471304568	9.87586850845745	9.79128137634823	9.97740717691189
7.00562454919388	6.52812268632857	6.77341500242242	6.52911266409833	6.15793931033575	6.21721495895313
3.52356195605701	3.4611352150646	3.21895220572771	4.02387282684165	3.93366862599012	3.94847214598054
5.02236781302845	4.45868139359118	4.43243576229115	4.47347289718894	3.45242805283596	4.38322475132988
7.70390357344466	7.17487258720753	7.97956873413145	7.69824594590439	7.43067880526537	8.01342529685786
5.44294349584873	4.95357169221723	5.98208327555307	5.45574154237242	4.95698123108756	5.84917430976909
6.60733031374961	6.21158202112632	6.89687053048382	6.56150740071845	5.9878601721241	6.83017304666103
9.43149760425805	9.53071044625253	9.65562189280669	9.60668653431697	9.58661073221931	9.65132863777113
7.92184093707449	7.51240656886796	7.89572128622383	7.26629941150682	6.78779638564993	7.69833162100529
10.477252323938	10.4045374797054	10.455231199511	10.5275460378823	10.4580803255447	10.5585435396586
8.95274124718649	8.75837212949485	8.90983175615163	8.58455124646424	8.53817733241116	8.91435721477299
4.83289001416474	4.51685006650366	4.54749737035094	3.6571655276825	2.42911544773853	3.19513728444974
8.13699111208023	8.07503812298549	8.58671261389398	7.49965112390853	7.26294610265474	7.85536704411681
6.31288295528436	5.58068032540697	6.39595266942239	5.21577616260693	4.0315319145068	4.66770745902438
7.14465824283188	6.75193635743088	7.14778141849959	5.38044176580813	5.25776334086864	5.62377625728727
6.76155123244448	6.12431322141483	6.78622047587905	6.0860546750644	6.05413939557822	6.40392530783205
9.52258153125483	9.11521955415879	9.12768388537699	9.40166317246305	8.97158112485339	9.30518282679991
10.6710987257485	10.6992127362859	10.6819935201755	10.7080791133786	10.6461885047014	10.6669142798356
8.27844945822048	8.22677246449184	8.65929025312898	8.4278275236356	8.64630771631815	8.53916034852782
7.13442632022093	7.32744429080199	7.68474580867211	7.11656634753293	7.35772943188071	7.07193440798545
8.25502856981873	9.13411099344478	8.57886784818334	8.66317494872044	9.20429845405256	8.5907170514429
4.35755200461808	4.33452438750865	4.80206146329021	6.46186740938351	6.19735219787322	5.82576525052785
10.5464121951194	10.4954883819019	10.4621031046129	10.5862814855217	10.6071664964346	10.4742217245812
9.63390340934852	9.2481618386932	9.24384237480419	9.57350748793678	9.31831688913509	9.79724570107393
5.89481776330794	5.95200412229863	5.38034382929138	7.14788537748583	7.08198490782229	6.75672684381965
6.78790255939143	6.93473087383124	7.00002705944508	7.54640402499523	7.48484701443659	7.46157973456163
8.22158712126481	7.59644120039137	8.03113223013505	8.57039251860851	8.44356578661649	8.77742740032182
7.46352437327118	7.28104069955878	7.71969785409848	8.66649062644929	8.79982811372678	8.82449755869653
8.55266909751427	8.34172184003229	8.91614821026865	8.95968232412319	8.8622826101323	9.3896623833088
6.11894107272351	6.44476382237239	6.59634145922175	6.49591300749508	7.0087879210309	7.46157973456163
4.04439411935845	3.4611352150646	4.49105231098207	4.97652879330422	5.25776334086864	5.77780200635968
7.08214904135387	6.44476382237239	7.02203238586795	7.23766508493408	7.11219576498088	7.41413093076489
7.86727873970966	7.55828357645408	8.01413752937288	8.19013186586057	8.11756817404881	8.56516399043345
6.99435343685886	6.91442729910107	7.48882252218714	7.91249859116686	8.09831297711431	8.11177771896789
9.69609817095586	9.66809312337111	9.74234504376003	10.1077168351392	9.99987423700204	10.0968076218714
5.94251450533924	5.52646589352974	5.41209169373501	6.97166763496674	6.76231651912023	6.94499675947448
9.92703716872029	10.0283383871907	9.84509500502578	9.54978201473755	9.68136920973277	9.45352282514822
9.88340698638837	10.1052816475989	9.77138877938592	9.78296121279803	9.84783486590675	9.80996590730888
10.2002856052243	10.0017183450952	10.1273435290712	10.2405381138338	9.9418252804395	10.2560268413291
6.43462822763672	5.93147660305459	6.0247110166559	6.97166763496674	6.46153440933915	6.98853467468865
7.86108690599539	8.06161642196056	7.99695115501247	8.07149866452747	8.14126259417991	7.91949626798045
5.8703647195834	6.44476382237239	5.77396368807613	5.69017912492378	5.7130409881829	5.77780200635968
10.8544788341716	10.7531877367769	10.8477307403672	10.939125940481	10.8261812472429	10.8900027414303
8.77643303244473	8.20260136437776	8.42594242988138	8.58102560473783	8.35806547845674	8.91435721477299
6.11894107272351	6.12431322141483	6.69423655050412	5.12515042661382	5.21863201240317	4.81530451540871
3.95419631038688	3.87778550452716	4.75443751320717	4.31130840363534	4.20848780993131	4.50367859178255
6.92481250360578	6.44476382237239	6.97769929920344	7.67758237784506	7.42276257905375	7.7883218731493
6.60733031374961	6.45900727404404	6.79891923581658	6.68376106153824	6.50876334201068	6.75672684381965
10.3134499409631	9.84045727260325	10.1846165738233	10.0071755926519	9.51958802160176	10.0192070398374
9.47876961947576	8.95648057416489	9.2310798012585	9.14556727677638	8.99696652862728	9.18927561286427
6.33091687811462	5.97223413077223	7.04372445855439	6.84842666473945	6.72318519065476	6.94499675947448
5.4757334309664	5.11101684867829	5.06022802214812	5.12515042661382	4.9080651983303	5.35760287208639
5.84549005094437	6.34076975633239	7.14778141849959	6.23707849767554	6.56930373252129	6.93390843830975
5.2667865406949	5.41127924015914	5.96031372854794	5.30064388294993	4.57098514209268	5.35760287208639
8.37721053038855	8.79606361167272	8.35474268257168	6.92372644130374	7.09212942325533	6.74412215369096
6.69348695749933	7.17487258720753	7.10700728363812	6.78226377201965	6.84949615855455	6.67943021312972
6.56224242422107	7.16636130381236	6.68063072463524	6.76862878188125	7.3906319951221	6.70564849953041
7.93369065495223	8.72802645280478	8.46457712283829	8.26374593156219	8.73743213862891	8.43030274426378
10.7043359711823	10.7790914474926	10.7907833843728	10.7052016588311	10.7124499089969	10.7703422331803
6.11894107272351	5.77865345794236	5.58982794999034	6.23707849767554	5.68509097069813	6.27052461024978
1.32192809488736	0.617961414902942	1.78917717231585	3.3412987200248	0.924562269486935	2.2415304897091
4.6724253419715	3.57752311304631	3.34601263463123	3.3412987200248	3.82827022453651	3.45226315803808
7.0389189892923	5.95200412229863	6.55238141923383	6.78226377201965	6.07553832034428	6.81818322641278
10.6763978870448	10.6971730191885	10.6540414842589	10.7245052962363	10.7735923302176	10.6888863752965
8.30606168942834	8.55925497792034	8.38183392719216	8.20424697006265	8.42841206828172	8.09161002323142
7.2045711442492	7.58383753776763	6.84868177595625	6.25732460377796	6.76231651912023	6.76922471325639
4.6724253419715	5.38093356346908	5.28092755757435	4.92307296753624	5.21863201240317	5.03257013096887
6.27612440527424	6.17732640868095	5.79854232372537	7.42630370664857	7.82564667759587	7.58111772976374
6.62205181945638	7.94444648255384	7.52850816023713	6.29691912849157	6.66920762982884	6.59785699151982
4.97727992349992	5.84620758327249	5.17456981801981	5.52702337209689	5.96503458838781	5.25701345331335
6.27612440527424	6.17732640868095	6.27603805607014	6.71265337502902	6.69646232676589	7.102032182586
3.95419631038688	4.3979828674226	4.17242936937469	6.95984262470429	7.01948722014893	7.04120955151415
6.13955135239879	6.06920687503317	5.77396368807613	5.56128723506343	5.7936232483966	6.16190573552147
9.75572215364228	10.0425483767684	9.92518397075595	9.61322461434139	9.88120648107365	9.8474811834776
6.53138146051631	6.71703838595349	7.04372445855439	6.9114674797308	6.39591690957464	6.58381174471598
6.07681559705083	6.37128126956202	6.55238141923383	6.56150740071845	6.21664129592218	6.61176973402048
7.55842071326866	7.51240656886796	7.87713761232245	7.44295460671009	7.55869257382981	7.80691127601743
7.69696752623429	7.83251544850623	7.89572128622383	7.28505364833729	7.53695396943868	7.94214146942928
4.7279204545632	4.2680429586017	5.41209169373501	3.7908987903721	4.36517316587071	4.25205035649873
8.1006623390052	7.81116365700408	8.29907101640527	7.70506339660686	7.34097688877897	7.92519025098955
5.53915881110803	5.60701782661654	5.21085349344884	5.65910290012106	5.7130409881829	5.56863937693951
5.5077946401987	5.31818834169633	5.96031372854794	5.88955933351121	5.47162598030879	5.75322244125582
5.62935662007961	5.41127924015914	6.10654772022759	5.25888368930342	5.81946370032106	5.89490633908718
6.65105169117893	6.95474334783916	6.89687053048382	7.12708779905238	7.18964414894972	7.53741853945662
8.62021982550749	8.47492736496929	8.83856577878779	7.71184624081159	7.57299561058939	8.00806260088558
8.36413465500805	8.75016124610125	8.89711975439227	6.69828530713853	7.28067454855948	7.46157973456163
8.5372184005386	8.60568429651727	8.8418784809052	7.45940056741071	7.55148464497314	7.46157973456163
4.7279204545632	3.78469460606435	5.21085349344884	4.31130840363534	3.71407883415158	5.32482952851552
4.83289001416474	5.07328898033306	5.84654132731114	4.02387282684165	4.12286597339084	4.86139388414393
10.0091287895393	10.0403716181956	9.87897838819049	9.38242284811511	9.63796309425699	9.44137664996267
6.11894107272351	5.60701782661654	5.86998551855742	5.75024395329723	4.9080651983303	6.02416330830473
6.62205181945638	6.56800671830309	6.97769929920344	6.19564207854942	6.03240079118709	6.76922471325639
7.84235034341381	7.24115666758426	7.14778141849959	7.55403957399572	7.17068878306963	7.70494481490043
10.6532929453828	10.6373965121039	10.5236921856459	10.5624552832721	10.5789363989189	10.5228548317858
8.75988818322183	8.54342888829528	8.45180741927982	8.65651880823656	8.50975601000637	8.59433161150561
7.89178370321831	8.50469772413214	8.33641052314719	7.70506339660686	8.04895616439787	7.89069184120874
10.5966556676747	10.7154240521348	10.7316249576206	10.7393287795966	10.7338432623505	10.6713349659015
8.57175264350355	8.51772788785003	8.51870836315113	8.08691672911551	8.19199073877468	8.18504144716882
4.93073733756289	4.67808828549433	4.97893715627328	4.86738918387135	4.80465735438032	5.1859278968944
10.2556187498396	10.2123222800254	10.2464115098561	10.3042506781583	10.2770000921454	10.2918569209649
5.18982455888002	4.2680429586017	4.30797131761662	5.45574154237242	5.21863201240317	5.14905748229743
10.9647018574204	10.7167665347119	10.8495041969233	10.9165706397662	10.7770246711656	10.8451814207245
10.2743781532464	10.1752406489736	10.1873560664692	10.4044202978631	10.2868420556057	10.5633007688397
8.20212382383046	7.68750693179316	7.78065967816404	7.90666357124338	7.7464977957522	8.1802688223972
5.59991284218713	5.11101684867829	5.17456981801981	5.59469441107059	5.21863201240317	5.80197860957365
6.17990909001493	6.03122232295202	6.06617867405699	6.17443183258981	5.56721150809851	6.08477758394146
5.2667865406949	4.72794523364979	4.75443751320717	4.92307296753624	4.0315319145068	4.66770745902438
9.56128794516483	9.70873810182887	9.4029965308845	9.34707631409101	9.36139273902497	9.28949395790639
10.7494504655699	10.7531877367769	10.666083765228	10.6885349562586	10.7625506714419	10.6464066853766
9.61930295541569	9.75091599954996	9.7641795767079	9.67379104937987	9.56019393589103	9.7032919616942
10.7155330635266	10.4907633692594	10.5818323976798	10.7181016860296	10.5148686113132	10.6274299927033
6.21916852046216	6.22839964808162	6.0864968733893	7.23766508493408	6.92004411508054	7.33149083798275
9.90463462166815	9.68083420105013	9.68254220582925	9.62135248270562	9.75272138419433	9.67233418839507
7.48784003382305	7.14918144199688	7.705813089482	7.33978692873326	7.51486472731373	7.71152848551025
5.96578428466209	5.82405082993398	6.1458748673797	6.95984262470429	6.9427749824933	7.18880660789848
5.22881869049588	4.8226151437651	5.6175349382647	4.74853600189173	5.00421016375909	5.25701345331335
6.15987133677839	6.03122232295202	6.68063072463524	6.35419435785788	6.72318519065476	6.19900806390525
4.7279204545632	4.8226151437651	4.8482420390064	5.0774233017496	5.3328234027881	4.50367859178255
9.36303963025651	9.55096303365233	9.5133881847914	9.60668653431697	9.62530439457326	9.61564051347599
10.6142497276894	10.6910359231432	10.5626977460334	10.731584610486	10.738787323032	10.6346880314314
3.64385618977472	5.553836302863	4.89306416366416	3.3412987200248	4.36517316587071	4.25205035649873
4.4262647547021	5.2184426217989	4.09985173013969	4.12670951213927	4.74986991575351	4.44468113392301
10.0867996856235	10.1821459090376	10.0781597241811	10.2241237200712	10.0728689138677	10.0625251358166
7.54303182025524	7.50572786640421	6.84868177595625	9.52910512340778	9.17369375426976	9.26449777022266
3.85798099512757	4.19823610548472	2.56759490347354	6.01571120032168	5.62741915164244	5.1859278968944
3.08746284125034	4.19823610548472	2.34953177419607	6.62403190293711	6.56930373252129	6.38789536992662
6.07681559705083	5.49854803987063	5.50354968015174	8.50848581698013	8.02870435992071	8.06083172835132
4.4262647547021	3.96505430423864	4.24170686140998	5.38044176580813	4.95698123108756	4.99160250306151
6.25738784269265	5.75538881686638	6.47617342122666	6.42693163015787	6.32699654004143	6.51150609859604
2.90689059560852	3.78469460606435	3.21895220572771	3.91245686687681	4.85733705373553	4.10805902261312
5.76818432477693	5.11101684867829	5.50354968015174	5.91576051493452	5.96503458838781	6.21721495895313
3.08746284125034	4.45868139359118	3.94342298032825	4.61806977613308	4.9080651983303	4.56040634581997
8.07414146275251	8.43077283193667	8.51050461588681	3.5085438943729	3.58949268174602	4.03042321534228
10.2825093062408	10.2873102274278	10.2185112624295	10.239518100472	10.1712855769932	10.0928923812514
8.77643303244473	8.80664827776225	8.79483220137091	9.12222664071491	9.18689388847674	9.24372644420678
10.706064267335	10.7912293166018	10.6810040121058	10.8084116972391	10.7416045075099	10.7462065628389
8.86263735755879	8.81976722914277	8.94734361644439	8.31210118109719	8.29234956390152	8.35582600551162
6.67948009950545	6.79714990218726	6.61071743729548	6.54540820068092	6.69646232676589	6.49660961065129
10.7603041252864	10.7053140647801	10.7200915638783	10.7173882757408	10.5613937584286	10.6292478539718
8.60177078840771	9.03698824771661	8.79483220137091	8.58455124646424	8.95352714729312	8.64751308679191
7.17492568250068	7.73375037088038	6.97769929920344	6.72686858823474	7.27183901261308	7.12176143693097
3.52356195605701	4.67808828549433	4.24170686140998	4.31130840363534	4.4372689337294	4.03042321534228
4.6724253419715	5.63286756818037	4.97893715627328	4.39484919493275	5.47162598030879	4.76772813896765
8.72962074355304	8.69985503944434	8.7498063102029	8.59157474457485	8.65602054654406	8.41814822683052
10.5013396180614	10.2633782201946	10.2854032074797	10.4026152081741	10.2470425727064	10.191455564776
7.09275714091985	6.75193635743088	6.5671761216006	6.35419435785788	6.09660801779427	5.89490633908718
8.68825030913318	8.65943474645562	8.4603324338155	8.88307160422887	8.42077186257277	8.61583488094318
10.580729651599	10.5585100319469	10.428598018071	10.5775944621175	10.5436234866488	10.529673323702
6.69348695749933	5.88949310290092	6.10654772022759	6.15287947117315	5.62741915164244	6.58381174471598
7.16490692667569	6.66910762874577	7.4230940640071	5.91576051493452	5.59764616773689	6.35530310933329
6.92481250360578	6.66910762874577	7.11730355506614	5.38044176580813	4.9080651983303	5.77780200635968
6.60733031374961	6.51457067548937	7.28246709510341	6.17443183258981	6.32699654004143	6.70564849953041
5.53915881110803	5.2184426217989	5.98208327555307	5.80772453343067	5.74043196766772	6.38789536992662
6.8008998999203	7.050715581125	6.42854947114361	5.12515042661382	6.01031154906213	5.51136073019216
7.39660478118186	7.97347725829136	7.6197379354353	6.56150740071845	7.16111179773814	6.63920754439325
10.2342186782385	10.253128302527	10.3209167469217	10.382596594968	10.3631306706112	10.4113476843084
7.60362634498619	8.14874898839534	7.51275771124226	8.43965253389806	8.61342490441275	8.3810718106244
9.51471405413849	9.55096303365233	9.3109718979319	9.6374613871373	9.61252759452829	9.56978048213349
10.4893462407191	10.528123065363	10.5269810553554	10.4566021958512	10.6025017062711	10.4384748969698
9.83209884603913	9.98255052807779	9.72761291815051	9.84332583607553	10.0808710428533	9.83819145343775
8.69522829149575	9.03475131430204	8.71063998104333	8.83723757377101	8.89789170255774	8.54290334487041
9.68912440491326	10.0338209007274	9.97947011012521	9.9206547538902	10.1090743320243	9.68961311795721
6.17990909001493	6.03122232295202	6.70772196925571	6.27726851788744	5.8697263441223	6.49660961065129
10.2318211786574	10.1011164937379	10.2238651278363	10.3669196059901	10.2399571738643	10.3268370863773
9.46454575033394	9.50377500820666	9.27404337734047	9.39975155920554	9.58497452733963	9.29847945267957
6.97154355395077	7.55182131420816	6.65304911420972	6.9114674797308	7.31545745495118	6.74412215369096
5.10852445677817	5.47006039493839	5.06022802214812	3.6571655276825	4.36517316587071	4.03042321534228
10.1667907507182	10.1412061416989	10.2104450290003	10.3770845179631	10.3121049829273	10.2803936703415
5.8703647195834	5.86801812314063	6.31127297552255	6.01571120032168	5.7130409881829	6.18057357677894
6.94836723158468	6.85168207732832	7.27323165850794	6.51261594297227	6.1377991926407	5.89490633908718
10.1376315982354	10.0436354844183	10.1130417593909	10.0665464172759	10.0226598441398	9.98304942106766
7.8856963733394	7.60893207705004	7.86462138282914	7.56163173896098	7.04063827100999	7.50754937123806
7.2240016741981	6.98423415221805	7.68474580867211	6.89909500763989	6.70988893746113	7.13152796115113
5.59991284218713	5.68317377483728	5.67148189482185	6.29691912849157	6.15793931033575	6.06484836488198
8.03617361255349	8.36723409869366	8.5945172013711	6.51261594297227	6.64139950037998	7.0920676867889
5.68650052718322	5.93147660305459	5.69775569006896	5.99141566847939	6.17778753197355	6.14299855645079
7.08214904135387	6.93473087383124	6.95503951551079	7.45120288869809	7.43067880526537	7.19814043505184
10.617008227652	10.4962743313326	10.7402180764853	10.6657370776475	10.4735696893941	10.7719922918333
4.78135971352466	5.03451298267111	5.06022802214812	5.91576051493452	5.94182211198099	5.45176717702648
2.4594316186373	3.03919762325003	2.34953177419607	2.65872461320796	2.70393463167972	1.57497005349077
10.9244413923392	10.946951792684	10.8601018104776	10.9613068200306	10.9427781509518	10.9864879220425
10.1705510353167	10.0555381206272	10.0059047733868	10.3158658250141	10.1903582719364	10.3145195224078
5.91886323727459	6.03122232295202	5.82273080578509	5.96667019389722	5.74043196766772	5.45176717702648
8.86573327085176	9.23076186910572	8.98997135754722	7.46754825996681	7.67575654695937	7.33149083798275
7.45532722030456	7.89973584393786	7.88955187547351	7.18853390930524	7.68889337019691	7.32296630692175
10.2894425756883	10.3825485366763	10.1969056918291	10.2935140303052	10.4203529924241	10.2096774576477
8.71938882094208	8.33434614967701	8.12401158391599	8.27710821730634	8.33786594823404	7.89649791078431
6.05528243550119	6.08781843278933	6.47617342122666	6.82235330208792	6.65537414532564	6.63920754439325
6.72109918870719	6.43037352840495	6.90868332121957	6.99500827102821	6.93145670880421	6.88870214730589
5.53915881110803	4.51685006650366	4.54749737035094	4.92307296753624	5.5360850927584	5.14905748229743
8.12670447284319	8.19853183918631	8.36382671766304	8.48213701372755	8.46598653274885	8.59793733400433
8.52943055414615	8.82237628813035	8.87785067942444	8.7867522435	8.97158112485339	8.81830766601081
6.65105169117893	7.31981669722073	6.83639265795036	6.35419435785788	6.61301499579721	6.14299855645079
5.06608919045777	5.25248933778294	5.47366946056314	3.91245686687681	3.71407883415158	3.32929698347301
9.85564716602727	9.7535938826772	9.80868748276539	9.96022091161739	9.92532504082436	9.80838186873842
9.70822173003835	9.95619140201933	9.71833248524056	9.80574224303599	9.99138304660302	9.86741040253708
9.67154106671188	9.41629976436887	9.51976410360732	9.60504700351115	9.5230182133046	9.4834576777076
6.45121111183233	6.21158202112632	7.12753072348083	6.42693163015787	5.8697263441223	6.63920754439325
6.59245703726808	6.15987810458764	6.77341500242242	6.69828530713853	6.62728078439073	6.96692637942936
8.67771964164101	9.08531504984015	8.81180166820245	8.63973193620786	9.01197493441147	8.88204090685071
10.2848241002246	10.1432313087599	10.2424568993999	10.2179159623829	10.1573437626348	10.148041250671
7.62570884306447	7.54532899482042	7.72659308022469	7.33978692873326	7.33252313772935	7.12176143693097
7.63299519714296	7.53225305702538	8.10266142908006	6.54540820068092	5.62741915164244	5.70279907596279
5.33985000288462	4.95357169221723	5.58982794999034	5.38044176580813	5.04986450203883	4.86139388414393
9.60640521269779	9.8479786890164	9.81743516679859	9.44118797833166	9.43091606504462	9.29174546943886
7.44708322620965	6.96464300743378	7.4230940640071	7.09527159503148	6.4126183765819	6.73140880110031
7.80413102118332	7.87939528506805	8.10802707678536	8.25024867095097	8.06395087610743	8.00806260088558
11.0275604822488	10.8613153901406	11.0625371623408	11.0681012051904	10.9626788135916	11.0864034086978
5.79441586635011	5.2857253401377	5.64474713235534	5.56128723506343	5.47162598030879	5.65059044630124
6.17990909001493	5.70766293195228	6.39595266942239	6.39105786646756	5.7130409881829	6.43547174636767
5.53915881110803	5.38093356346908	6.1458748673797	5.99141566847939	4.95698123108756	5.54027812272484
7.68299458368168	7.27315454213027	7.85200149808137	7.8345804357235	7.42276257905375	8.06600625915952
5.5077946401987	5.31818834169633	5.53285524436486	5.65910290012106	5.91820940080216	5.98232391302184
6.92481250360578	6.92461600238201	6.9435820000762	7.68450579975436	7.49241335037569	7.57392386297518
9.90011206297746	10.1702873217318	10.1777462178486	10.1704150801807	10.2277248336222	10.1975545799508
10.3111806600534	10.201689051547	10.3007247512898	10.4205573030454	10.4432888498232	10.4436349434074
6.15987133677839	6.106185094514	6.41233822916855	4.31130840363534	4.28907007014501	3.56576066593543
8.54496443278924	8.76381934090328	8.77767163292325	8.83139617675628	8.66886475156076	8.86110104516609
10.6577650352654	10.7327764151907	10.6947989936322	10.8374252068424	10.9002090800287	10.862343357265
6.66533591718518	5.95200412229863	6.63906881088638	6.9114674797308	6.73635359328034	7.17941332921603
6.86418614465428	6.52812268632857	6.89687053048382	7.26629941150682	6.88522435842188	7.08203540478505
10.7138160802345	10.5823521257994	10.7898620769844	10.7470283251698	10.5256195983962	10.6836428505997
6.63662462054365	6.60678271596505	5.89307448108856	6.87400098490191	6.84949615855455	6.74412215369096
5.02236781302845	4.91127008674041	4.93660547935903	6.87400098490191	6.39591690957464	6.81818322641278
10.6595499968799	10.6786801843722	10.5776009687231	10.8740978957131	10.7653194433153	10.8198565845287
9.91513244895065	9.69903506070755	9.80517429994386	9.89317037041776	9.67831398633203	9.98445661560889
6.82654848729092	6.65686328574097	6.65304911420972	6.78226377201965	6.93145670880421	6.97777010304536
4.83289001416474	4.45868139359118	3.94342298032825	3.5085438943729	3.30010417612872	3.04754022806541
5.91886323727459	5.49854803987063	5.34792042793151	5.52702337209689	4.85733705373553	4.76772813896765
9.68737568343747	9.62622903579215	9.62426197194303	9.62943121009021	9.35946386078866	9.57906728717603
11.2422809503024	11.0200987880169	11.2595989237605	11.2360242201265	11.0597367305489	11.1699382170016
10.7359790396134	10.4515651135625	10.5648357223559	10.7181016860296	10.4947961422411	10.7165412569054
1.8073549220576	3.33415260851929	2.34953177419607	7.75838588064845	7.18019926102211	7.49998658662637
9.96650545190574	9.99385756562062	10.1330268638601	9.96022091161739	10.0578826168669	10.0026289943416
5.68650052718322	5.52646589352974	5.02012459256767	6.51261594297227	6.01031154906213	6.3387328252581
10.1743015444676	10.13205635266	10.1116041721391	10.2935140303052	10.1410786863972	10.1853312213924
6.01122725542325	6.06920687503317	5.86998551855742	5.91576051493452	6.05413939557822	5.91725130849765
3.64385618977472	2.43156056860666	2.0949676812568	2.32291389144078	2.42911544773853	1.57497005349077
5.02236781302845	5.14775176222301	4.37147393822559	6.0395728601124	5.4039824378323	5.38966369491998
7.75822321472672	7.19174102393832	7.90186582025035	7.41789979568203	7.16111179773814	7.47706270897972
5.8703647195834	5.58068032540697	6.27603805607014	4.92307296753624	4.12286597339084	5.11124157014134
7.17492568250068	6.87291208584333	7.15780673343531	6.69828530713853	6.23566248115739	6.93390843830975
6.72109918870719	6.21158202112632	5.89307448108856	6.15287947117315	6.05413939557822	6.35530310933329
6.07681559705083	5.44097921490548	5.96031372854794	5.77929330256666	5.3328234027881	5.91725130849765
5.22881869049588	4.62638436895566	4.43243576229115	4.86738918387135	4.9080651983303	5.48186495162704
4.83289001416474	4.19823610548472	4.54749737035094	4.97652879330422	5.04986450203883	5.35760287208639
6.15987133677839	6.41583333284508	6.76050100671076	6.74093416483915	6.72318519065476	6.74412215369096
5.06608919045777	5.07328898033306	4.60192609813369	6.94791203259644	7.11219576498088	7.08203540478505
5.56985560833095	5.52646589352974	5.58982794999034	6.54540820068092	6.5840297165731	6.52625361916601
4.97727992349992	4.2680429586017	3.94342298032825	5.02792810856376	4.50575837081054	3.94847214598054
10.0354864512922	9.48444388121281	9.19213792809546	9.59019999032836	9.117281194082	9.52437118026909
10.8165837077876	10.6079714161884	10.632735751134	10.8216778021256	10.7239012708011	10.7470454364493
8.96722625883599	8.79340485629371	8.79824124613472	8.99898567048761	8.91134469208682	8.86711426355771
7.30833903013941	6.70520911047886	7.06511207103101	6.87400098490191	6.65537414532564	6.92273611391144
7.68999797141945	8.31198231505922	8.086450187105	7.87710003261659	8.31736401862278	7.84939642961603
9.54592976908547	9.82783080792731	9.66914149557714	9.83229973997553	9.98283888052023	9.89007590657915
6.45121111183233	7.40151185877262	6.68063072463524	6.57741493905821	6.98713524356421	6.65273736192784
10.2720465243899	10.10215894797	10.3967271862587	10.4187738961218	10.2799601148857	10.4007798156017
10.211279947482	10.4539969018988	10.2090964958381	9.94249725608415	10.1201950047533	10.0342415884383
10.714674827308	10.633841120085	10.678031626819	10.8413332304103	10.8215433505754	10.8254336729535
5.82017896241519	6.93473087383124	6.69423655050412	8.37534093714422	8.71598533959337	8.20397897567495
4.7279204545632	4.57269135888201	4.75443751320717	7.12708779905238	7.0717646863501	6.67943021312972
5.06608919045777	4.86764634415128	4.89306416366416	7.06267931000191	6.90853561608389	7.19814043505184
3.64385618977472	4.67808828549433	4.60192609813369	6.33537408280267	6.50876334201068	6.32197423847032
7.27146302790437	7.3500801298528	7.6123406278318	8.92465849103004	8.59330943891148	9.00179569425133
5.84549005094437	6.71703838595349	6.49172296812844	9.44858574083491	9.16259561151355	9.19649295076362
8.00281501560705	8.64471049439534	8.39075835898949	10.6753448771763	10.5098780075953	10.4992348711426
9.47674620393947	9.84045727260325	9.81219258465324	10.9511613061435	10.6355868225073	10.8892413889264
5.62935662007961	5.80153669423368	6.0247110166559	8.08179711580623	7.90047008782624	8.00806260088558
10.399277924509	10.4612669503747	10.4540828630785	10.5949123974026	10.5247955891527	10.529673323702
3.24792751344359	3.03919762325003	2.34953177419607	6.82235330208792	7.55869257382981	6.74412215369096
5.33985000288462	4.99462895069659	4.70527704434117	5.96667019389722	5.91820940080216	5.38966369491998
6.15987133677839	6.5548382607127	6.06617867405699	5.65910290012106	6.39591690957464	6.18057357677894
4.4262647547021	4.67808828549433	4.09985173013969	4.54772630139037	4.95698123108756	4.81530451540871
5.5077946401987	6.03122232295202	5.58982794999034	5.25888368930342	6.05413939557822	5.45176717702648
10.1579784499454	10.0349148241	10.1832449784346	10.026462782744	10.0820103967638	9.97599323647058
1.32192809488736	2.86448913179062	-1.55904674355704	2.92686429600143	2.93271575547781	2.88351136082358
6.74819284958946	6.68124549785499	6.41233822916855	6.68376106153824	6.90853561608389	6.38789536992662
9.9136374280491	9.88133235211329	9.79281398117102	10.1344755253806	10.1648685250897	9.99984777754875
9.98655314975666	9.95503398391657	10.0529594219015	10.0700261521567	10.1301269821218	9.96320639537456
6.25738784269265	5.77865345794236	5.91581881934643	6.01571120032168	5.43822180424171	6.12384582274151
10.0586682503406	10.1166721467646	10.024292234783	10.1245037071679	10.259104331304	10.0665217229978
7.49585502688717	7.50572786640421	7.31885909029179	5.75024395329723	6.07553832034428	5.59646548109213
6.01122725542325	6.29371430666266	5.96031372854794	5.1712314564881	5.81946370032106	5.29131127280994
5.56985560833095	5.2857253401377	5.24629328549821	5.88955933351121	5.50423474277931	5.91725130849765
10.4923539451599	10.3765687704541	10.5258855539611	10.7435340307122	10.5428102423723	10.6517840469127
10.9769220678511	10.6689939764191	10.7917041350799	10.8137339544686	10.7444159086951	10.8070291939108
8.00842862207058	7.53225305702538	8.12401158391599	7.86508900847121	7.62875917421931	7.99727834977704
3.52356195605701	3.19445149801781	2.34953177419607	1.87331382109348	3.12869283613752	2.48789179165415
3.75488750216347	4.57269135888201	3.85874328642841	1.87331382109348	2.70393463167972	0.325426204017499
4.35755200461808	4.57269135888201	4.43243576229115	5.1712314564881	4.9080651983303	5.07243038899704
4.61470984411521	5.07328898033306	4.54749737035094	3.15008487720176	4.20848780993131	4.10805902261312
9.41679752760606	9.64803957566029	9.6043291517777	9.8211819020322	9.82466858568809	9.64603016584173
7.19475685442225	7.59644120039137	7.30984224520264	7.61360230093006	8.16455402838789	7.60954732857789
3.64385618977472	4.67808828549433	4.30797131761662	5.62728669610016	5.89418241046373	5.29131127280994
5.06608919045777	5.60701782661654	4.97893715627328	5.52702337209689	5.94182211198099	5.1859278968944
7.01680828768655	6.9939275672291	7.09664096900892	7.1581640238551	7.42276257905375	6.91147850376891
3.64385618977472	4.7760826298145	1.40621359733427	4.86738918387135	5.3688650439388	4.76772813896765
4.4262647547021	5.70766293195228	5.44319159712969	4.61806977613308	5.84482559774728	4.44468113392301
4.04439411935845	5.11101684867829	3.46328913025229	3.15008487720176	3.45242805283596	4.25205035649873
4.88264304936184	5.63286756818037	5.09930304448597	2.65872461320796	3.30010417612872	2.2415304897091
7.07146236255662	7.41586515904368	6.96641152630222	7.95828353917883	8.33379004248321	7.98095265057358
4.55458885167764	4.2680429586017	5.17456981801981	2.32291389144078	2.42911544773853	3.32929698347301
6.34872815423108	5.63286756818037	6.63906881088638	5.65910290012106	4.63324601438911	6.02416330830473
6.51569983828404	6.15987810458764	6.23996909705317	6.40911513368528	6.15793931033575	6.02416330830473
7.2807707701306	6.89382402980806	6.79891923581658	7.27570943236199	7.03010357812979	7.102032182586
5.96578428466209	4.95357169221723	4.43243576229115	5.02792810856376	4.69279901962163	4.71856559429913
8.27379559921426	8.08391475800025	8.086450187105	8.19485348716605	8.00296105828423	8.14152137795302
10.4099212412497	10.4036981254095	10.4344275675443	10.4976015368236	10.4318689355569	10.4579877551636
8.15228484230658	7.85354554350421	8.11870202323458	8.25024867095097	7.90605990506171	8.30838876530835
10.7410455770098	10.8631289627023	10.7392656749706	10.921479825317	10.9542713999915	10.8150593785615
10.6160893135821	10.4327793054424	10.4948873281786	10.4652480845667	10.4380299506069	10.4932702936801
8.66355810421727	8.87355878286544	8.39963082873519	8.68947281970014	8.67524196132122	8.48573573108255
6.93663793900257	6.90416367821162	6.66690232210782	8.11222463409827	7.83742742397361	7.72460830311234
10.7636273517276	10.8959668921618	10.8601018104776	10.9342812764326	10.9680564513446	10.9364550783602
9.95782756083374	9.74554477155828	9.79458589110774	9.93482884227379	9.73229154715795	9.94019682448262
7.61838550225861	7.77299361041742	6.95503951551079	7.72530950270928	7.75897627225669	7.53741853945662
5.2667865406949	4.99462895069659	3.76907963919325	6.63921635541942	6.46153440933915	5.9392627584252
4.20945336562895	4.3979828674226	3.21895220572771	6.33537408280267	6.34455451542754	6.14299855645079
4.97727992349992	5.11101684867829	4.30797131761662	6.51261594297227	6.66920762982884	6.51150609859604
6.07681559705083	5.07328898033306	6.1263381590892	5.59469441107059	5.21863201240317	5.96095049880477
5.8703647195834	5.77865345794236	6.0247110166559	4.86738918387135	5.00421016375909	5.32482952851552
8.13185696060879	8.0205591634812	8.46457712283829	8.11222463409827	8.24961588400713	8.40178478829786
10.5882461520448	10.5532398406464	10.5015830945308	10.5592461134579	10.6811913105894	10.501217714826
7.44708322620965	7.15779780362808	7.02203238586795	6.37275323174062	6.73635359328034	6.51150609859604
5.18982455888002	4.3979828674226	4.65447759454398	4.54772630139037	4.12286597339084	4.10805902261312
7.93369065495223	7.6457477360192	8.12401158391599	7.22798230749776	7.05109254560326	7.64433053926369
6.45121111183233	6.91442729910107	6.36264331316902	6.93587395622935	6.99800437459596	6.69259761995601
3.08746284125034	3.4611352150646	2.34953177419607	5.65910290012106	5.74043196766772	4.76772813896765
4.12928301694497	3.78469460606435	3.57218132756176	6.27726851788744	6.07553832034428	5.72822625357209
7.14465824283188	7.84831764918347	7.10700728363812	7.18853390930524	7.60811300448288	6.91147850376891
5.71424551766612	6.22839964808162	5.98208327555307	5.25888368930342	6.03240079118709	4.61503258219888
6.62205181945638	6.03122232295202	6.0864968733893	5.49185772577297	4.80465735438032	5.48186495162704
5.98868468677217	5.65824728830633	5.96031372854794	5.38044176580813	4.4372689337294	5.62377625728727
7.51175265376738	7.03204177550261	7.5974374051421	7.75183578204648	7.37427952237389	7.90228121140111
6.07681559705083	6.17732640868095	6.23996909705317	6.83545357798999	6.93145670880421	6.95600233120285
6.31288295528436	5.52646589352974	5.84654132731114	6.89909500763989	6.76231651912023	7.22579261583046
8.33762190199251	8.06161642196056	8.67413901738152	8.62955764259189	8.49894408552325	8.7678303614598
6.98299357469431	6.72876825457695	6.62495905846883	7.22798230749776	7.36602947741612	7.63051554580313
8.60177078840771	8.3599923384713	8.65555534348014	8.81963621139668	8.65602054654406	9.06347561964077
7.18487534290828	6.96464300743378	7.27323165850794	7.73199060382378	7.27183901261308	7.60249114398081
6.36632221424582	6.01183525918843	6.22160932828739	6.19564207854942	6.17778753197355	6.21721495895313
7.37937836707126	7.24115666758426	7.3805258666044	7.33081899279539	7.12211974551823	7.25293583176212
9.33203654836165	9.25964247491664	9.21820943443031	9.32298158269486	9.21076856051877	9.32950442369262
9.49685377738804	9.1506913950993	9.24129839696146	9.30872302960326	9.31831688913509	9.3727233339942
10.9244413923392	10.8430488766568	10.8334682917165	10.9097909241931	10.8582140501823	10.8975947261113
4.20945336562895	3.57752311304631	3.94342298032825	5.12515042661382	4.9080651983303	5.35760287208639
8.09011241966429	7.6151358479374	8.59061990417288	8.18063827396033	7.44637529023258	8.44635449203888
4.35755200461808	4.19823610548472	4.75443751320717	5.59469441107059	4.80465735438032	5.51136073019216
9.6733090755617	9.68505551319468	9.62029621206289	9.39400025575367	9.55350934264946	9.42502455153669
7.19475685442225	6.27766992137209	6.50711544621529	6.75485322235692	6.19735219787322	6.63920754439325
8.15734693536284	8.0205591634812	8.086450187105	8.26821489037367	8.09345657726858	8.45034027762
10.655083445198	10.6373965121039	10.6510159855009	10.7358142656318	10.6454339573978	10.6888863752965
7.59618975614441	7.44413642726614	7.05445578722783	7.61360230093006	7.25399506868941	7.33149083798275
6.57742882803575	5.82405082993398	6.1458748673797	5.25888368930342	3.93366862599012	4.66770745902438
6.45121111183233	5.75538881686638	5.89307448108856	5.49185772577297	5.4039824378323	5.22189894279918
6.29462074889163	5.44097921490548	5.41209169373501	5.83556340367804	4.95698123108756	5.65059044630124
6.15987133677839	5.88949310290092	5.79854232372537	6.15287947117315	5.7130409881829	6.10444107215337
6.8008998999203	6.29371430666266	6.42854947114361	6.56150740071845	6.15793931033575	7.00983092587895
3.75488750216347	2.15145515053493	2.56759490347354	4.54772630139037	5.21863201240317	4.03042321534228
3.95419631038688	3.03919762325003	3.46328913025229	4.22219422599246	4.0315319145068	3.67114404185098
7.10328780841202	6.9939275672291	6.82400362731973	7.30354830260935	7.71479491429791	7.46157973456163
10.8536994203002	10.7982085619018	10.9646785914894	10.8471739181711	10.7722169815493	10.8278174123205
5.59991284218713	5.14775176222301	5.17456981801981	5.56128723506343	5.59764616773689	6.16190573552147
6.65105169117893	7.05995962916173	6.86087257996518	6.44451369223554	6.9427749824933	6.69259761995601
9.10197567094923	8.85075861102325	8.6851814017439	8.70886204656382	8.74652179581168	8.82758278946051
10.4257404243162	10.5793940401319	10.430932514696	10.4391407590099	10.463262936541	10.4812682761251
8.04165915163721	7.7450757567583	7.97373025046087	7.74525341681876	7.62875917421931	7.69168863784795
11.0664256006356	10.973996277538	11.1274073600887	11.1139589483559	11.0207023949796	11.0803949540732
9.36084708417966	9.0414513886956	9.16293448012359	9.10325606562139	8.75254822279212	9.17473410046283
4.97727992349992	4.2680429586017	3.85874328642841	3.7908987903721	3.45242805283596	4.25205035649873
7.93369065495223	7.43007236720918	7.80699022308992	6.72686858823474	6.37900924641066	6.81818322641278
10.1592406504117	10.2577966886577	10.2117923698254	9.70307495650115	9.73082054452308	9.69988412709327
6.33091687811462	6.21158202112632	5.93822866989535	4.86738918387135	4.80465735438032	4.66770745902438
5.02236781302845	4.67808828549433	4.54749737035094	4.47347289718894	4.80465735438032	4.76772813896765
5.3037807481771	5.14775176222301	5.58982794999034	4.02387282684165	3.82827022453651	4.50367859178255
10.3437409184722	10.2380836715838	10.3396067895635	10.4320917881539	10.4459107459426	10.4176522458189
6.27612440527424	7.24922516491679	6.69423655050412	6.84842666473945	7.26294610265474	6.71858489623035
9.36303963025651	9.1952973916211	9.29876155716919	9.72274782228096	9.42908272699119	9.65132863777113
11.0838117072529	10.898325238914	11.0337552103221	11.033630609977	10.8876187516721	11.0355686503577
5.71424551766612	5.03451298267111	5.53285524436486	5.3411384194437	5.68509097069813	5.77780200635968
6.90086680798075	6.69327872885986	7.12753072348083	7.29433297340048	7.04063827100999	7.5225595747872
6.76155123244448	6.68124549785499	6.78622047587905	7.97505636324681	7.86068918613713	7.91378021521461
4.97727992349992	4.67808828549433	4.54749737035094	6.52911266409833	6.2544230940051	6.71858489623035
7.64024493622235	7.58383753776763	7.66338318254298	7.90666357124338	7.96073795843915	8.03468317509435
10.6878130625649	10.5889849869433	10.586052109269	10.6987046406548	10.6723391171742	10.6766223564497
8.49785183695112	8.83792905239664	8.80842285889381	8.47451235715283	8.65602054654406	8.36428938464992
9.35204342579543	9.68083420105013	9.40756920460493	9.43188280535771	9.66910720663948	9.25068277676209
5.62935662007961	5.80153669423368	6.0247110166559	6.37275323174062	6.34455451542754	6.23519981315784
7.50382573799575	8.15296604946379	7.74709351103234	7.99162125438445	8.4014827645238	7.9699675735819
7.33539035469393	7.14918144199688	7.87713761232245	7.53872459328833	7.2894534460658	7.64433053926369
4.97727992349992	3.68494888616691	3.67380846999506	5.02792810856376	5.04986450203883	5.32482952851552
10.2801907922169	10.3885027949821	10.3209167469217	10.3733971270364	10.4572146470574	10.4218403629889
7.83605035505807	7.88450828035268	7.93222224988564	8.09709748266292	8.04392122004507	7.70494481490043
9.81778312177453	9.95387560530074	9.79988929219355	10.0371907234662	9.98406274415967	9.96177876722114
5.37503943134692	6.60678271596505	5.98208327555307	10.2817020865227	10.2789741513288	10.0678515154841
2.4594316186373	3.4611352150646	0.115065214379401	9.15018687494411	8.95352714729312	9.04763224684273
6.09803208296053	5.49854803987063	5.47366946056314	6.99500827102821	6.68290277716974	6.65273736192784
6.11894107272351	5.14775176222301	5.34792042793151	6.52911266409833	5.89418241046373	6.38789536992662
2.16992500144231	1.80065887288731	0.115065214379401	2.32291389144078	0.924562269486935	-1.29474102694147
8.01959072835788	8.36723409869366	8.05350096021406	8.23203758921987	8.52048324491653	8.1658575699255
9.63390340934852	9.93638356997886	9.73683717376168	8.62273148501798	8.99444905857759	8.84900054841782
10.171802288683	9.78140577920377	9.97632978469878	9.97895323857463	9.67831398633203	10.0081757418953
10.3269911749008	10.4203900570786	10.4517835908597	10.4178812992689	10.5181856055388	10.4620630317253
10.1234747982441	9.97458074862588	10.0619013099002	10.0490105036691	10.0095144233729	10.075805187441
10.1516508299734	10.2744747700704	10.1804980784139	10.1122139952583	10.259104331304	10.1007124955579
3.85798099512757	4.19823610548472	5.31479211508739	4.02387282684165	3.45242805283596	4.10805902261312
8.97584796800678	9.19130069267881	9.04308256633567	9.31485247814532	9.34783318942882	9.28045337929639
10.5531492755985	10.7181077273704	10.5519626373609	10.6804898351684	10.7590818161896	10.6035915911865
4.49185309632967	4.57269135888201	4.37147393822559	5.62728669610016	5.62741915164244	4.61503258219888
8.55266909751427	8.77734508774417	8.69978120083829	8.27266895262815	8.33379004248321	8.20867560310732
7.59618975614441	8.20260136437776	7.84565214567088	7.71184624081159	8.21444211571272	7.73110496457617
6.49984588708321	6.52812268632857	6.84868177595625	6.79576103263087	6.5985990382492	6.84206617375814
8.94397991434374	8.72243747175646	8.96880653990124	8.92192593907754	8.77934370778596	9.22736624730926
10.6613327527952	10.5025460460206	10.6245402765959	10.7622955822279	10.5493027147222	10.6482013187192
10.0464419480073	10.0403716181956	9.99972598185443	10.0454755348374	9.99502857667419	10.0718337134951
10.2986354067342	10.2827396727483	10.3605153664611	10.4678309799053	10.4606740826105	10.4081852675841
9.48280795672667	9.05033508552016	9.13589131477188	9.54464271055941	9.42356794106371	9.43730559211909
2.16992500144231	2.43156056860666	1.78917717231585	-0.277245184654682	0.924562269486935	1.07876106554831
6.62205181945638	6.142208930024	6.42854947114361	5.02792810856376	5.13684632212839	5.25701345331335
5.3037807481771	3.87778550452716	4.43243576229115	3.5085438943729	2.70393463167972	4.10805902261312
9.78381675932018	9.69206278770967	9.50484524791695	9.70307495650115	9.63006512933751	9.5604348249553
10.7801296196253	10.6166480324834	10.6286435234343	10.7358142656318	10.5525374450631	10.6580329535815
10.5230718269404	10.4852305629985	10.5159904388416	10.5933472816288	10.5501121138719	10.535492758155
6.05528243550119	5.553836302863	5.89307448108856	5.94145779612026	5.3688650439388	6.00339198228885
2.70043971814109	2.66474236985273	2.7583238043547	5.69017912492378	5.50423474277931	4.90608638820704
5.06608919045777	4.86764634415128	4.70527704434117	6.82235330208792	7.25399506868941	6.55531347110446
5.37503943134692	5.25248933778294	5.28092755757435	6.59313532554514	6.55441768029042	6.37168927533123
6.86418614465428	6.45900727404404	6.90868332121957	8.21821452692035	8.35002138295722	8.40589270116936
2.70043971814109	2.66474236985273	3.08032555527072	6.97166763496674	7.16111179773814	6.63920754439325
3.52356195605701	3.4611352150646	2.34953177419607	4.22219422599246	4.74986991575351	4.25205035649873
2.90689059560852	2.66474236985273	2.0949676812568	3.5085438943729	2.42911544773853	2.48789179165415
8.46147944728616	8.78539806864952	8.2510720128195	9.05461675795661	9.22574765242537	8.7901270677566
10.2940463132715	10.306344788097	10.0840291291222	10.3177919045391	10.3255175046137	10.111075224309
4.49185309632967	5.65824728830633	4.43243576229115	4.22219422599246	3.82827022453651	3.45226315803808
9.3297963382207	9.64948156561494	9.32308517613601	9.56339096688852	9.71899529396431	9.46956366057499
6.29462074889163	7.01311475802897	6.69423655050412	6.13097377665755	7.08198490782229	6.46635747769103
1.32192809488736	1.33099539615863	0.115065214379401	2.65872461320796	2.08493950349443	-1.29474102694147
9.9136374280491	9.84672793073203	9.91703506163666	9.94377105736183	9.78138812047649	9.98304942106766
10.2270141936491	10.1948800324257	10.1818721473743	10.0918565012873	10.0368578459116	9.95318385352534
4.04439411935845	3.87778550452716	2.7583238043547	5.56128723506343	5.74043196766772	5.14905748229743
7.36194377373524	8.3636179149303	7.85200149808137	7.72530950270928	8.24090677153193	7.69833162100529
3.64385618977472	4.2680429586017	2.7583238043547	5.77929330256666	5.81946370032106	5.03257013096887
5.44294349584873	5.14775176222301	5.28092755757435	5.59469441107059	5.7130409881829	5.56863937693951
4.28540221886225	3.78469460606435	4.02364373213252	3.3412987200248	3.82827022453651	4.44468113392301
7.01680828768655	7.050715581125	6.88496545138529	7.65659423788261	7.60811300448288	7.29709301578948
10.6352646565395	10.6402343197435	10.5722951055148	10.8613445902244	10.7673923548938	10.7769314193102
4.7279204545632	4.7760826298145	3.85874328642841	6.42693163015787	5.89418241046373	5.84917430976909
5.84549005094437	5.07328898033306	5.17456981801981	4.47347289718894	3.30010417612872	4.76772813896765
6.09803208296053	5.03451298267111	4.93660547935903	6.17443183258981	5.29580754618006	5.22189894279918
8.15734693536284	7.62131216842132	8.02548836303944	7.94129749553916	7.2894534460658	7.80691127601743
9.45840661323653	9.28606901964193	9.42797811288998	9.43747368146024	9.16704566683893	9.37909829968775
10.9192357860283	11.0098032922399	10.8749900440553	10.948762889634	11.0207023949796	10.9445459402705
6.92481250360578	6.40114007978326	7.07569435226645	7.16836420651001	6.70988893746113	7.2348959766337
5.74146698640115	6.19455929610622	6.23996909705317	6.19564207854942	6.15793931033575	6.19900806390525
2.90689059560852	1.33099539615863	0.893482945537092	-0.277245184654682	0.924562269486935	-1.29474102694147
7.24317398347295	6.86233744320776	6.4604635668925	5.77929330256666	5.74043196766772	6.28787468998334
3.95419631038688	3.03919762325003	1.78917717231585	6.88660690329318	6.49320063679559	6.79390712652037
4.55458885167764	5.88949310290092	4.24170686140998	4.47347289718894	3.93366862599012	4.50367859178255
6.40087943628218	6.21158202112632	6.78622047587905	6.51261594297227	5.8697263441223	6.75672684381965
5.18982455888002	4.95357169221723	5.56160784027874	5.62728669610016	5.21863201240317	5.67692578483052
8.56795607541547	8.99386111498844	8.28482939523192	8.10720125435074	8.55564572385485	8.52787401971208
5.2667865406949	6.03122232295202	5.50354968015174	5.12515042661382	5.84482559774728	5.54027812272484
4.88264304936184	4.33452438750865	4.80206146329021	4.97652879330422	5.04986450203883	5.14905748229743
5.8703647195834	6.56800671830309	6.0247110166559	4.31130840363534	4.69279901962163	5.14905748229743
5.89481776330794	5.49854803987063	6.36264331316902	5.0774233017496	4.63324601438911	4.99160250306151
5.4757334309664	5.14775176222301	5.17456981801981	-0.277245184654682	1.62413965788592	3.45226315803808
10.211279947482	10.0150918237007	10.1101652273921	9.99375229088042	10.034501710584	10.0095591751743
6.33091687811462	6.19455929610622	5.74898210607065	5.12515042661382	4.69279901962163	5.59646548109213
7.43879185257826	6.93473087383124	7.31885909029179	6.56150740071845	5.59764616773689	6.37168927533123
7.37068740680722	7.77851079606649	6.96641152630222	5.3411384194437	6.39591690957464	5.72822625357209
5.91886323727459	5.95200412229863	5.79854232372537	4.47347289718894	4.50575837081054	5.03257013096887
5.68650052718322	5.65824728830633	5.98208327555307	5.0774233017496	4.69279901962163	5.03257013096887
10.2940463132715	10.2465662198815	10.2252006602389	10.2384973078791	10.1766102466923	10.2986923434793
9.47876961947576	10.0117604470551	9.57802046263996	10.125615368995	10.5773508666765	10.0837161930937
10.2556187498396	10.5327234962846	10.298181834765	10.4815227289188	10.5970392926192	10.41240031802
6.38370429247405	7.03204177550261	6.31127297552255	7.42630370664857	7.49241335037569	7.05152245904692
3.75488750216347	2.66474236985273	3.57218132756176	6.25732460377796	6.36189023198712	6.52625361916601
9.20089860503844	9.60109129647932	9.61233359499603	9.43374903113468	9.60124926813985	9.47553427507578
8.76652890859886	9.1972914578916	9.10000206378099	8.7867522435	9.19779763494059	8.84595984678942
6.57742882803575	6.40114007978326	6.81151304612518	6.87400098490191	6.68290277716974	7.04120955151415
5.06608919045777	4.91127008674041	5.56160784027874	5.86283409386407	5.4039824378323	6.25296797709771
6.03342300153745	5.63286756818037	5.89307448108856	6.56150740071845	6.34455451542754	6.55531347110446
7.49585502688717	7.56471605858401	7.86462138282914	7.99162125438445	7.84328001117723	8.11177771896789
7.08214904135387	6.93473087383124	7.24518468810899	7.67062289628403	7.88356242466225	7.36510459555128
6.69348695749933	6.47310685000737	6.73433998008457	7.23766508493408	7.0717646863501	7.29709301578948
4.83289001416474	4.45868139359118	5.50354968015174	4.47347289718894	4.20848780993131	4.10805902261312
7.94544383637791	8.48823708347114	8.06456338537729	8.06112022447646	8.17834109101671	7.98641465595551
9.80170835891646	9.95619140201933	9.96686979131336	9.78296121279803	9.83288974086989	9.88557058810372
6.03342300153745	5.82405082993398	5.86998551855742	6.27726851788744	6.15793931033575	6.37168927533123
6.25738784269265	5.95200412229863	6.27603805607014	5.59469441107059	5.09404585999761	5.59646548109213
7.51963625284321	7.90979603993166	7.52850816023713	5.21577616260693	6.11735846509505	6.92273611391144
7.04984854945056	7.16636130381236	7.10700728363812	4.92307296753624	5.81946370032106	5.67692578483052
5.02236781302845	3.96505430423864	4.37147393822559	4.54772630139037	4.12286597339084	4.81530451540871
2.4594316186373	3.33415260851929	2.92781414019725	1.19073971427664	2.42911544773853	1.57497005349077
5.44294349584873	6.79714990218726	6.18421254661903	5.25888368930342	6.5985990382492	6.00339198228885
6.13955135239879	6.58105210439633	5.28092755757435	6.49591300749508	6.61301499579721	6.12384582274151
5.96578428466209	6.85168207732832	6.39595266942239	5.56128723506343	6.30921053263191	5.80197860957365
8.1873520732005	8.32320902023289	8.16583492606488	7.78426983652563	8.11277969601861	8.00268033298683
5.89481776330794	6.51457067548937	6.39595266942239	5.75024395329723	6.07553832034428	6.04464613434075
3.24792751344359	3.19445149801781	3.94342298032825	3.3412987200248	3.71407883415158	4.18181137861468
-1	0.617961414902942	-1.55904674355704	1.87331382109348	0.924562269486935	-1.29474102694147
1.32192809488736	0.617961414902942	0.893482945537092	2.65872461320796	2.42911544773853	1.94559343497647
5.14974711950468	3.96505430423864	3.85874328642841	5.94145779612026	5.25776334086864	5.59646548109213
3.52356195605701	3.03919762325003	3.57218132756176	5.12515042661382	4.20848780993131	4.76772813896765
5.65821148275179	6.24501706043451	5.82273080578509	5.45574154237242	4.57098514209268	4.86139388414393
10.6452080827747	10.6188087854721	10.7162276191801	10.5101600638452	10.5509210349358	10.6704518881701
9.64475759251626	9.82909860651761	9.87730199377073	9.06694357452019	9.25105097400379	9.07915059202018
9.34762136856813	9.48606507320917	9.53243646249192	9.41496843470636	9.30231082443864	9.3727233339942
10.6133290543711	10.7134079042369	10.5754808398609	10.7195273649476	10.7597762905054	10.7045060069311
9.86341195894164	9.67801288396641	9.8226597743413	9.72574887337761	9.47774125263027	9.78441482281265
6.65105169117893	6.142208930024	6.41233822916855	6.51261594297227	5.96503458838781	6.58381174471598
7.13442632022093	7.07826607059422	7.07569435226645	6.31628493759431	6.36189023198712	6.30502302003059
6.70735913208088	5.97223413077223	6.39595266942239	6.29691912849157	6.1377991926407	6.51150609859604
5.98868468677217	5.58068032540697	6.06617867405699	5.21577616260693	5.21863201240317	5.29131127280994
3.64385618977472	2.15145515053493	2.92781414019725	3.5085438943729	1.62413965788592	2.69892829650727
7.76487159073609	7.52566886485515	7.68474580867211	7.50755775904372	7.62875917421931	7.07193440798545
10.2520740427962	10.279072422949	10.275102586094	10.2496833639444	10.3159505546261	10.2144988424646
10.6434052771157	10.4970598384732	10.7392656749706	10.5332914534132	10.3111419003831	10.5179651065923
7.75822321472672	7.46497033868657	7.94419749716459	6.01571120032168	6.17778753197355	6.84206617375814
7.19475685442225	6.72876825457695	7.38913516845317	6.23707849767554	5.4039824378323	6.88870214730589
7.72451385311995	8.1697080331008	7.65619523348951	8.3545918022245	8.63324918284762	8.28185599983732
2.90689059560852	1.80065887288731	2.34953177419607	3.6571655276825	5.09404585999761	4.03042321534228
7.30833903013941	7.72233234278023	7.11730355506614	8.57394629048811	8.87608820407293	8.54663686526276
5.79441586635011	6.19455929610622	6.04558589616204	6.57741493905821	7.14175453806655	6.59785699151982
9.97513145692134	9.98255052807779	9.8261329208565	9.91676285568513	10.0309598896752	9.99147251736321
10.5966556676747	10.2132849325821	10.5049199769749	10.5349284734515	10.2789741513288	10.6237875338777
8.37721053038855	7.92970149172496	8.11870202323458	8.01878108045733	7.98727955120646	8.21802422247879
6.40087943628218	5.68317377483728	6.203025654386	6.23707849767554	5.7130409881829	6.6255524489885
10.5406124082495	10.6036127985893	10.5616276319628	10.3387975415872	10.4675668474415	10.4081852675841
8.11634396123747	8.25445304032081	8.03675527110547	7.91830824135839	7.90605990506171	7.81917529486422
8.39446269461032	8.83534892938483	8.44752696035886	5.12515042661382	5.3688650439388	5.59646548109213
5.96578428466209	5.75538881686638	6.72108909333658	1.87331382109348	2.08493950349443	1.07876106554831
4.7279204545632	3.87778550452716	4.24170686140998	4.22219422599246	4.36517316587071	4.18181137861468
6.60733031374961	7.14918144199688	6.58182856501109	6.39105786646756	7.15146736829246	6.83017304666103
7.66177809777199	8.07057854682166	7.76060883132575	6.72686858823474	7.43067880526537	7.12176143693097
5.10852445677817	4.2680429586017	5.34792042793151	4.12670951213927	3.82827022453651	3.94847214598054
7.29001884693262	7.28888255249837	7.44807564601258	6.89909500763989	6.76231651912023	6.73140880110031
6.11894107272351	5.47006039493839	5.98208327555307	6.44451369223554	6.1377991926407	6.3387328252581
6.63662462054365	6.37128126956202	6.4604635668925	6.47899863684373	6.50876334201068	6.54085512228322
8.64205169292798	8.22677246449184	8.25594052294754	8.11222463409827	7.87787983011317	8.02409253879102
10.5444815223108	10.439342214515	10.2828345724444	10.360410531133	10.5444362482877	10.2252896693946
7.26209484537018	7.82188037875835	7.24518468810899	7.41789979568203	8.12709519209623	7.33149083798275
8.4241662888181	8.73359314473689	8.37285692111933	8.39982194139799	8.75555152075317	8.31276485091498
9.75905593916017	9.9859522669311	9.8519322228848	9.70915905324616	9.94560496081857	9.64248724577781
10.775198728898	10.8787486651573	10.8017958433134	10.5234269919599	10.5693955534476	10.5689892610126
7.76487159073609	7.56471605858401	7.88955187547351	7.40944269505158	7.14175453806655	7.35677271029673
6.63662462054365	5.97223413077223	6.50711544621529	6.49591300749508	6.2544230940051	6.65273736192784
6.15987133677839	5.80153669423368	5.91581881934643	5.96667019389722	5.91820940080216	6.00339198228885
8.80574387215162	9.1506913950993	8.79141551300259	9.25864813253019	9.46885987700699	9.1327369977427
7.7714894695006	8.19445041478146	7.94419749716459	7.57668786939968	7.82564667759587	7.71152848551025
8.41151098801207	8.47492736496929	8.24618789846567	8.22283812128823	8.35806547845674	8.10676159247429
10.2185632361903	10.1381628712667	10.0334034270915	10.2384973078791	10.2225956017036	10.2606992880648
3.64385618977472	4.04718658977498	3.46328913025229	3.5085438943729	4.63324601438911	3.19513728444974
4.6724253419715	4.45868139359118	3.57218132756176	2.65872461320796	3.12869283613752	1.07876106554831
1.32192809488736	1.33099539615863	1.40621359733427	4.54772630139037	4.50575837081054	4.71856559429913
6.23840473932508	5.82405082993398	6.58182856501109	5.25888368930342	5.00421016375909	5.14905748229743
6.29462074889163	5.65824728830633	6.06617867405699	6.25732460377796	5.94182211198099	6.35530310933329
6.90086680798075	5.70766293195228	6.70772196925571	6.86127500833862	6.70988893746113	6.71858489623035
8.5372184005386	7.63967883014598	8.39520105127302	8.21357487837314	7.68889337019691	8.68193097954759
7.11374216604919	6.86233744320776	7.37186764800541	6.9114674797308	6.81281084037119	6.98853467468865
7.09275714091985	6.5548382607127	6.5671761216006	6.17443183258981	6.05413939557822	6.23519981315784
10.6179265567988	10.3188918042815	10.428598018071	10.5059869891258	10.3888584269041	10.4671413417274
10.3799198176465	10.0327261193756	10.2144834828848	10.2435934904069	10.1454349630609	10.192677387354
9.12282799480767	8.67110332978336	9.17361878243071	9.07428544705191	8.92466681388491	8.99080037944164
6.23840473932508	5.60701782661654	5.86998551855742	5.65910290012106	5.65655861948655	5.59646548109213
7.85486838326024	7.57749277160725	7.67053738523249	7.40944269505158	7.52226746599461	7.50754937123806
6.03342300153745	5.58068032540697	5.77396368807613	6.42693163015787	6.21664129592218	6.49660961065129
5.56985560833095	4.19823610548472	4.17242936937469	4.31130840363534	4.20848780993131	4.50367859178255
6.01122725542325	5.34991348350369	5.84654132731114	5.56128723506343	5.25776334086864	5.89490633908718
7.16490692667569	6.59397669814351	6.87296663054156	6.52911266409833	6.32699654004143	6.70564849953041
7.85486838326024	7.47184644201005	7.74029063199344	7.75183578204648	7.52963040481292	7.84939642961603
5.89481776330794	4.86764634415128	5.93822866989535	5.52702337209689	4.95698123108756	4.99160250306151
5.84549005094437	4.99462895069659	5.91581881934643	5.65910290012106	5.25776334086864	6.12384582274151
5.06608919045777	4.19823610548472	4.17242936937469	6.01571120032168	5.17834959891815	5.89490633908718
6.57742882803575	6.22839964808162	7.00002705944508	6.97166763496674	7.03010357812979	7.14123023145742
7.66177809777199	7.20840804168415	8.00270151041688	7.76490402742289	7.44637529023258	8.06600625915952
6.11894107272351	5.52646589352974	6.16516426891851	5.91576051493452	5.68509097069813	5.98232391302184
5.02236781302845	3.87778550452716	5.02012459256767	4.68489457224183	3.12869283613752	5.1859278968944
7.40514146313634	7.17487258720753	7.57480566676782	7.55403957399572	7.46189390751922	7.92519025098955
5.4757334309664	5.34991348350369	5.53285524436486	4.92307296753624	5.09404585999761	4.81530451540871
7.37937836707126	6.8082281044003	7.47265428166181	7.38374541386583	7.08198490782229	7.56669473199285
6.467605550083	5.88949310290092	6.42854947114361	6.9114674797308	6.52415118166912	6.6255524489885
6.33091687811462	6.15987810458764	6.29375735309217	6.60867291269677	6.01031154906213	6.87718068427232
6.876516946565	5.97223413077223	6.68063072463524	6.60867291269677	6.42911861619703	6.76922471325639
8.72280753116955	8.08391475800025	8.32716107214617	8.23661368081257	7.98201222424631	8.12672453374559
4.55458885167764	5.14775176222301	3.85874328642841	3.3412987200248	2.08493950349443	2.88351136082358
5.56985560833095	6.95474334783916	6.32858955248043	4.02387282684165	4.0315319145068	4.66770745902438
6.66533591718518	6.34076975633239	5.64474713235534	5.1712314564881	5.3328234027881	5.38966369491998
8.25029841790633	8.38873664691168	8.13983015891113	8.66979809704666	8.67841946465244	8.51268994974708
10.4792750302502	10.3705632768242	10.4437087070009	10.4823738228579	10.4424137677989	10.3312908149939
5.82017896241519	5.44097921490548	5.28092755757435	5.75024395329723	5.43822180424171	5.48186495162704
10.5835529304665	10.378279890683	10.3494818658323	10.6679604016864	10.5231460817911	10.6228755117291
9.89405984627402	9.3695362767337	9.43919938873543	9.46143408443408	9.21076856051877	9.65660814138335
8.85018683764577	8.3599923384713	8.51050461588681	7.846867579214	7.77748335553986	8.25937477535222
6.82654848729092	6.45900727404404	6.63906881088638	5.88955933351121	5.47162598030879	6.45099546620676
6.4178525148859	6.59397669814351	6.31127297552255	6.84842666473945	6.76231651912023	7.06176374858863
10.3755825124905	10.4915519829255	10.3907513261537	10.4169881057603	10.5289106863637	10.3456732372957
6.60733031374961	6.22839964808162	6.50711544621529	6.9114674797308	6.84949615855455	7.03082401727379
8.69174351917128	9.2481618386932	8.60228202007707	6.33537408280267	6.95400048240409	6.81818322641278
6.36632221424582	6.30957636544649	5.24629328549821	3.15008487720176	3.12869283613752	0.325426204017499
7.1548181090521	6.95474334783916	7.5974374051421	6.33537408280267	5.9878601721241	6.73140880110031
2.70043971814109	1.33099539615863	2.0949676812568	2.92686429600143	2.42911544773853	1.07876106554831
3.52356195605701	3.33415260851929	2.0949676812568	3.6571655276825	1.62413965788592	2.88351136082358
2.90689059560852	1.80065887288731	2.0949676812568	2.32291389144078	0.924562269486935	0.325426204017499
3.85798099512757	3.4611352150646	1.40621359733427	3.15008487720176	3.45242805283596	2.2415304897091
7.39660478118186	7.2000994091049	7.05445578722783	6.84842666473945	6.09660801779427	6.98853467468865
10.3864014236408	9.96311582871374	9.92680853634039	9.92324306935152	9.45992052854763	10.2024156960698
10.8722901102881	10.9018553048257	10.8163564067572	10.9165706397662	10.9799316900389	10.8922844434337
8.69522829149575	8.59652115976915	8.7498063102029	8.65651880823656	8.56257116628129	8.75817045944975
10.382083590142	10.6123164660844	10.2371680702335	10.4258932865987	10.654461202309	10.3718624230691
9.12541347048331	8.49154477732218	8.28005245597871	8.81074781428248	8.28390883874498	8.64053205710587
7.18487534290828	7.07826607059422	7.64171681223094	7.45120288869809	7.32401687857265	7.4537768604466
5.94251450533924	6.58105210439633	5.89307448108856	7.08449558953895	7.60116119604586	6.78161755733889
2.16992500144231	1.33099539615863	0.893482945537092	4.31130840363534	4.4372689337294	3.76949646396102
1.32192809488736	2.15145515053493	1.40621359733427	3.3412987200248	2.70393463167972	2.48789179165415
7.0389189892923	6.6194723138318	6.72108909333658	7.33978692873326	6.61301499579721	7.2348959766337
10.2425786894513	10.2763156488759	10.1330268638601	10.2496833639444	10.1573437626348	10.1630705758294
2.4594316186373	2.43156056860666	2.34953177419607	4.47347289718894	4.28907007014501	4.44468113392301
3.39231742277876	2.86448913179062	2.0949676812568	1.19073971427664	0.924562269486935	1.94559343497647
4.49185309632967	3.96505430423864	3.67380846999506	4.54772630139037	4.0315319145068	4.03042321534228
8.18239435340453	8.03895608417296	7.74709351103234	8.10215891840831	7.78968391125492	7.98095265057358
10.8443134612033	10.5288908575451	10.6276187470851	10.713099796727	10.5931241861181	10.7156848458666
5.84549005094437	5.58068032540697	4.97893715627328	5.69017912492378	5.96503458838781	6.00339198228885
10.6003775531078	10.4684993300366	10.566970703264	10.5068226473388	10.3331232350758	10.5061631915173
7.93369065495223	7.93463381541525	7.5974374051421	7.77784570184833	7.81971808253035	7.79454441304495
8.5018371849023	8.52419763825977	8.40404776624467	8.43178083255213	8.24090677153193	8.41814822683052
10.7578066721972	10.7127352072832	10.7316249576206	10.6775522853421	10.7886307009773	10.741163275733
10.6040898614692	10.5017636210271	10.4859136261389	10.4806710925362	10.4580803255447	10.3620958988489
8.06339508128851	7.75630999166123	7.71277128592765	8.20424697006265	8.13183396264232	7.9918565062902
6.70735913208088	5.84620758327249	6.0864968733893	6.56150740071845	5.96503458838781	6.6255524489885
5.33985000288462	5.18354465032151	5.79854232372537	5.59469441107059	4.85733705373553	5.72822625357209
4.93073733756289	5.97223413077223	5.02012459256767	4.86738918387135	4.50575837081054	3.94847214598054
8.03617361255349	7.48549785793062	7.36315995360307	7.39236620143969	7.40679151383522	7.35677271029673
10.9552866455245	10.652231049092	10.8081832159092	10.6212426570176	10.5557645530575	10.7470454364493
-1	-0.915532320729043	-1.55904674355704	4.47347289718894	4.20848780993131	4.66770745902438
6.66533591718518	7.43712211023457	6.61071743729548	6.0395728601124	6.80036072443166	6.23519981315784
10.1013191544233	9.94340671008793	9.94616941984683	10.0192626713536	9.91378421420125	9.99845519976131
6.67948009950545	6.44476382237239	6.37938900227762	5.59469441107059	5.3688650439388	5.67692578483052
5.18982455888002	5.11101684867829	5.13740108818874	4.80928361895612	5.17834959891815	4.50367859178255
6.36632221424582	6.5008857996807	5.58982794999034	5.02792810856376	5.94182211198099	5.96095049880477
6.77478705960117	5.84620758327249	5.56160784027874	6.23707849767554	5.94182211198099	5.75322244125582
6.27612440527424	5.52646589352974	5.98208327555307	5.69017912492378	5.56721150809851	5.54027812272484
8.45327063401062	7.88960261502907	7.48882252218714	7.55403957399572	7.74021565940898	7.88486282268193
10.7760217152528	10.3233456885708	10.466667218467	10.5176389123194	10.2550955371606	10.4518536467677
7.12412131182919	6.38629051258573	5.44319159712969	5.91576051493452	5.94182211198099	6.08477758394146
3.24792751344359	4.19823610548472	2.92781414019725	6.37275323174062	6.97617915856038	6.08477758394146
6.56224242422107	5.97223413077223	6.55238141923383	5.86283409386407	5.74043196766772	6.3387328252581
5.62935662007961	4.86764634415128	5.31479211508739	5.59469441107059	5.25776334086864	5.9392627584252
9.2749604721406	9.04811945624233	8.97488368603698	9.044672768331	8.98940019268818	8.94882203005362
6.31288295528436	6.94477297579113	6.82400362731973	5.69017912492378	6.03240079118709	6.16190573552147
10.8676648483807	10.5860409391301	10.6849581949898	10.6500693569807	10.4649861243385	10.6984513483553
10.2615073092021	10.1381628712667	10.1736090866906	9.80008329359707	9.77570257698559	9.97599323647058
6.29462074889163	5.49854803987063	6.27603805607014	4.61806977613308	4.50575837081054	5.11124157014134
9.75238064655289	9.31932702010793	9.63019132718232	7.46754825996681	7.32401687857265	7.76949515234983
11.2926092227643	10.9280500171832	11.1162897837283	11.0719377632296	10.7933812128019	11.1522043921928
10.7702509273949	10.3392630170478	10.4367531572729	10.4356209217712	10.0238486491809	10.7208158679194
9.26326920037266	8.64174691334162	8.57886784818334	8.21357487837314	7.85491068253706	8.61583488094318
6.45121111183233	6.142208930024	6.04558589616204	5.1712314564881	4.50575837081054	5.29131127280994
5.82017896241519	6.8082281044003	6.34571155704058	7.02927213399475	7.67575654695937	7.16995983679763
6.91288933622996	6.96464300743378	6.88496545138529	6.46186740938351	6.69646232676589	6.58381174471598
0.584962500721156	2.15145515053493	-1.55904674355704	7.38374541386583	6.69646232676589	7.0920676867889
5.84549005094437	6.6194723138318	5.69775569006896	4.47347289718894	5.3328234027881	5.35760287208639
5.44294349584873	4.57269135888201	4.43243576229115	4.68489457224183	3.58949268174602	4.38322475132988
10.344850683943	10.214246921698	10.2815486294365	10.2333816146509	10.0728689138677	10.2872823077044
6.33091687811462	7.28888255249837	6.47617342122666	5.59469441107059	6.62728078439073	5.82576525052785
7.50382573799575	7.09633552877649	6.98890407302384	6.80912331837502	6.23566248115739	6.58381174471598
5.33985000288462	5.47006039493839	5.21085349344884	7.11656634753293	6.8251487915799	6.67943021312972
7.60362634498619	6.92461600238201	7.24518468810899	5.3411384194437	4.9080651983303	5.29131127280994
4.55458885167764	3.03919762325003	3.08032555527072	3.7908987903721	2.70393463167972	3.04754022806541
8.05799172275918	7.37970131890447	7.63442568648439	7.16836420651001	7.15146736829246	7.47706270897972
10.8959538928122	10.7341023199705	10.8343636162863	10.8484683890295	10.6589526083179	10.7695165110046
8.87805091272854	8.766534995752	8.86160487124738	8.76846848130015	8.8171455624478	8.82758278946051
5.06608919045777	5.58068032540697	4.70527704434117	6.0395728601124	5.8697263441223	5.38966369491998
5.4757334309664	4.45868139359118	5.02012459256767	5.59469441107059	5.17834959891815	5.48186495162704
6.76155123244448	6.8409447462907	6.37938900227762	7.01794818961951	7.03010357812979	6.91147850376891
10.3679607096416	10.3251232706664	10.280261600328	10.4232279583763	10.3943091935877	10.4249736639565
6.74819284958946	6.64451058431028	6.95503951551079	7.38374541386583	7.18964414894972	7.66481336529972
9.91662592221124	9.91866954859229	9.81917869373236	9.95644272595478	9.96062022302414	10.0287921974163
5.44294349584873	4.95357169221723	4.93660547935903	5.75024395329723	6.1377991926407	5.38966369491998
5.98868468677217	5.95200412229863	6.44459006529813	3.91245686687681	4.4372689337294	4.76772813896765
8.05799172275918	8.65943474645562	8.37285692111933	8.24571911597253	8.61009277789935	8.3430391644156
9.38909352190447	9.03475131430204	9.36121301031371	8.32070808646938	8.19199073877468	8.58709361038832
6.54689445988764	6.03122232295202	6.44459006529813	5.91576051493452	5.5360850927584	6.27052461024978
3.85798099512757	3.33415260851929	3.57218132756176	3.6571655276825	2.93271575547781	3.32929698347301
4.83289001416474	4.33452438750865	4.54749737035094	5.0774233017496	4.4372689337294	4.10805902261312
6.92481250360578	6.64451058431028	6.42854947114361	6.21652090082305	6.03240079118709	6.10444107215337
9.36959734627868	9.39570915888455	9.29876155716919	9.6753484125388	9.84377507047897	9.72525298260824
11.1932173226991	10.8270222047003	11.0258820728193	11.1454069761953	10.9415627052795	11.0983473731133
9.92851837525789	9.79315759358413	9.78926396821105	10.0838551753485	9.76569572322503	9.91976467504766
6.25738784269265	6.22839964808162	6.29375735309217	5.80772453343067	5.5360850927584	5.59646548109213
10.1842554954053	9.58910327945969	9.72390752453417	9.87586850845745	9.56684605982069	9.97174326301824
9.33650655981026	8.9253540700263	8.92557406943926	8.4357224797735	8.32560165742304	8.54663686526276
7.2807707701306	6.95474334783916	6.53744166845308	6.13097377665755	6.09660801779427	5.87221758745769
8.65999589242998	9.11943980273101	8.87785067942444	7.53872459328833	8.0885828948247	8.05563897732664
7.41362792902417	7.16636130381236	7.56718643902501	5.59469441107059	5.43822180424171	5.98232391302184
6.4178525148859	6.74040037315908	7.14778141849959	6.27726851788744	6.49320063679559	6.25296797709771
6.86418614465428	7.04140990564638	6.73433998008457	7.0736319732844	6.64139950037998	7.13152796115113
11.158294103604	10.6985331617097	10.9204940706183	10.9445552738884	10.6094929465774	11.0656037314342
10.7249401184624	10.13205635266	10.2542900747937	10.4695501405658	10.2070916249348	10.4832754077956
9.30947635384111	8.97996045751607	8.70340939868057	9.11040163045245	9.26972630868959	9.42296773144413
8.31061278165953	7.99721671062054	7.34559385275829	8.06112022447646	8.13655639256788	8.14152137795302
6.13955135239879	4.95357169221723	4.70527704434117	5.21577616260693	4.9080651983303	5.62377625728727
3.64385618977472	2.15145515053493	2.56759490347354	3.3412987200248	2.42911544773853	2.48789179165415
10.4609677625704	10.0609150384931	10.1386890807747	10.1454687378525	9.85860251505773	10.2348156759835
9.82416320974416	9.56481388089371	9.45033863697744	9.99497817852522	10.0544008268863	10.0464295897713
7.11374216604919	6.58105210439633	5.86998551855742	7.0736319732844	6.98713524356421	7.00983092587895
4.6724253419715	3.4611352150646	3.34601263463123	4.74853600189173	3.93366862599012	4.18181137861468
6.31288295528436	5.7317298411167	5.93822866989535	5.96667019389722	5.5360850927584	5.82576525052785
[truncated: 49,129 more rows]
