# Supplementary material for: MAnorm2 for quantitatively comparing groups of ChIP-seq samples
Source: HighWire-hosted journal article supplement (doi:10.1101/gr.262675.120), 2020-11-18
Supplement: Supplemental_Code.zip [file GM12891_cmp_GM12892.H3K4me3_profile_bins.xls]

chrom	start	end	GM12891_H3K4me3_1.read_cnt	GM12891_H3K4me3_2.read_cnt	GM12891_H3K4me3_3.read_cnt	GM12892_H3K4me3_1.read_cnt	GM12892_H3K4me3_2.read_cnt	GM12892_H3K4me3_3.read_cnt	GM12891_H3K4me3_1.occupancy	GM12891_H3K4me3_2.occupancy	GM12891_H3K4me3_3.occupancy	GM12892_H3K4me3_1.occupancy	GM12892_H3K4me3_2.occupancy	GM12892_H3K4me3_3.occupancy
chr1	751269	753075	85	80	96	8	4	16	1	1	1	0	0	0
chr1	760805	763278	757	921	700	817	807	719	1	1	1	1	1	1
chr1	763278	764784	283	268	232	328	203	244	1	1	1	1	1	1
chr1	793513	794348	30	44	28	27	22	28	0	1	0	0	0	0
chr1	800650	801853	24	34	46	15	7	25	0	0	1	0	0	0
chr1	858694	860648	32	65	43	29	63	47	0	0	0	0	1	0
chr1	875131	876410	21	35	25	11	37	35	0	0	0	0	1	1
chr1	876410	878293	57	87	85	39	76	45	0	1	1	1	1	1
chr1	892994	895346	837	1061	740	955	972	840	1	1	1	1	1	1
chr1	895346	897382	512	727	422	674	760	556	1	1	1	1	1	1
chr1	901292	902901	124	238	177	159	231	154	1	1	1	1	1	1
chr1	933289	934803	15	30	26	28	56	34	0	0	0	0	1	1
chr1	934803	936803	126	231	175	141	279	225	1	1	1	1	1	1
chr1	936803	938235	49	68	63	37	65	53	1	1	1	1	1	1
chr1	939942	941122	8	9	8	8	8	13	0	0	0	0	0	0
chr1	947594	950143	944	1296	896	996	1282	921	1	1	1	1	1	1
chr1	950143	951261	84	101	67	45	92	76	1	1	1	1	1	1
chr1	954235	956161	762	743	602	705	728	611	1	1	1	1	1	1
chr1	956161	957319	71	79	56	84	106	73	1	1	1	1	1	1
chr1	967659	970264	159	252	161	154	264	199	1	1	1	1	1	1
chr1	974145	976571	59	135	91	104	186	124	0	1	1	1	1	1
chr1	993864	995987	210	319	256	265	352	287	1	1	1	1	1	1
chr1	997529	998555	16	37	19	20	44	19	0	0	0	0	1	0
chr1	998555	1000507	140	203	156	129	214	143	1	1	1	1	1	1
chr1	1003398	1005445	261	334	260	241	329	263	1	1	1	1	1	1
chr1	1049928	1052783	716	727	553	693	816	648	1	1	1	1	1	1
chr1	1071865	1073619	76	125	108	42	97	76	1	1	1	0	1	1
chr1	1092463	1094575	424	784	560	481	681	490	1	1	1	1	1	1
chr1	1106591	1107693	12	11	8	14	42	14	0	0	0	0	1	0
chr1	1135798	1137277	79	141	104	114	140	113	1	1	1	1	1	1
chr1	1139771	1140811	14	45	16	54	74	27	0	1	0	1	1	1
chr1	1140811	1142811	161	350	191	236	417	187	1	1	1	1	1	1
chr1	1142811	1144699	41	69	50	49	81	47	0	0	0	0	1	0
chr1	1147396	1149757	101	151	117	76	133	79	1	1	1	1	1	1
chr1	1164990	1166087	37	35	48	58	62	52	1	0	1	1	1	1
chr1	1166087	1169081	1479	1941	1313	1656	1984	1449	1	1	1	1	1	1
chr1	1185692	1186589	27	32	43	53	46	48	0	0	0	1	0	0
chr1	1205936	1207921	24	61	43	112	165	126	0	0	0	1	1	1
chr1	1207921	1210471	1327	1747	1250	1563	1835	1298	1	1	1	1	1	1
chr1	1239918	1241205	45	85	79	68	101	72	1	1	1	1	1	1
chr1	1241205	1243205	593	788	579	653	718	585	1	1	1	1	1	1
chr1	1243205	1245688	1079	1341	964	1185	1209	949	1	1	1	1	1	1
chr1	1258579	1260880	953	1301	893	994	1086	856	1	1	1	1	1	1
chr1	1260880	1261880	109	162	95	80	114	84	1	1	1	1	1	1
chr1	1282986	1285627	742	1170	769	852	1155	808	1	1	1	1	1	1
chr1	1306811	1308272	27	38	22	17	31	23	0	0	0	0	0	0
chr1	1308898	1312352	1267	1671	1197	1669	1634	1291	1	1	1	1	1	1
chr1	1332593	1335421	1829	2440	1868	2243	2390	2057	1	1	1	1	1	1
chr1	1335421	1336851	503	661	457	439	512	468	1	1	1	1	1	1
chr1	1340677	1343481	1809	2251	1651	2074	2274	1819	1	1	1	1	1	1
chr1	1343481	1344806	295	382	317	313	310	357	1	1	1	1	1	1
chr1	1352482	1354276	74	104	113	66	79	76	0	1	1	0	0	1
chr1	1370529	1371924	39	75	47	63	99	82	1	1	1	1	1	1
chr1	1397004	1398959	3	8	1	141	210	136	0	0	0	1	1	1
chr1	1405557	1407768	1072	1102	914	1141	1087	1012	1	1	1	1	1	1
chr1	1407768	1409367	318	415	303	302	360	327	1	1	1	1	1	1
chr1	1440017	1441990	152	181	166	192	192	209	1	1	1	1	1	1
chr1	1445692	1447938	1208	1429	1029	1394	1399	1202	1	1	1	1	1	1
chr1	1447938	1449541	289	307	225	343	329	298	1	1	1	1	1	1
chr1	1475075	1476418	51	62	55	25	36	34	1	1	1	0	1	1
chr1	1507630	1508721	27	17	24	15	31	23	0	0	0	0	1	0
chr1	1508721	1510721	1610	2345	1522	1939	2044	1732	1	1	1	1	1	1
chr1	1510721	1511839	254	433	322	289	380	308	1	1	1	1	1	1
chr1	1534585	1536273	92	167	103	59	143	80	1	1	1	1	1	1
chr1	1549191	1552821	1847	2195	1742	2010	2137	1747	1	1	1	1	1	1
chr1	1563903	1565657	175	268	189	97	112	92	1	1	1	1	1	1
chr1	1565657	1566753	30	83	36	56	67	56	1	1	1	1	1	1
chr1	1589211	1591863	671	741	544	762	705	653	1	1	1	1	1	1
chr1	1608593	1610880	235	300	339	167	212	211	1	1	1	1	1	1
chr1	1622608	1624867	249	149	177	277	215	231	1	1	1	1	1	1
chr1	1624867	1626020	67	108	46	83	86	52	1	1	1	1	1	1
chr1	1654615	1657170	587	716	519	707	627	506	1	1	1	1	1	1
chr1	1676827	1678212	198	151	164	221	185	191	1	1	1	1	1	1
chr1	1678365	1679204	115	172	128	123	144	96	1	1	1	1	1	1
chr1	1706189	1708617	300	354	335	270	289	311	1	1	1	1	1	1
chr1	1708617	1710617	1459	1770	1215	1507	1607	1360	1	1	1	1	1	1
chr1	1710617	1712895	279	314	364	373	550	429	1	1	1	1	1	1
chr1	1713771	1714568	32	59	49	11	25	15	0	0	0	0	0	0
chr1	1759077	1761630	161	159	173	159	207	218	1	1	1	1	1	1
chr1	1764935	1766961	79	82	130	45	39	60	0	0	1	0	0	0
chr1	1771195	1772384	39	48	60	22	26	38	1	1	1	1	1	1
chr1	1772384	1775080	123	158	167	142	175	173	1	1	1	1	1	1
chr1	1794470	1797636	189	165	197	45	39	70	1	1	1	0	0	0
chr1	1817474	1818722	19	11	13	6	9	10	0	0	0	0	0	0
chr1	1818722	1820722	133	169	146	122	122	117	1	1	1	1	1	1
chr1	1820722	1822722	1923	2178	1484	2261	2226	1933	1	1	1	1	1	1
chr1	1822722	1824447	479	559	428	456	506	444	1	1	1	1	1	1
chr1	1839057	1841831	683	932	617	574	696	553	1	1	1	1	1	1
chr1	1849741	1851807	151	253	203	150	234	174	1	1	1	1	1	1
chr1	1980682	1983100	82	84	54	73	88	85	1	1	1	1	1	1
chr1	2063877	2065526	104	136	103	33	50	52	1	1	1	0	1	1
chr1	2120310	2122084	126	213	163	6	4	4	1	1	1	0	0	0
chr1	2124906	2127449	670	687	592	552	593	490	1	1	1	1	1	1
chr1	2130060	2131950	208	250	231	154	160	135	1	1	1	1	1	1
chr1	2135487	2137731	144	205	190	116	171	146	1	1	1	0	0	1
chr1	2157924	2159846	328	460	369	390	485	370	1	1	1	1	1	1
chr1	2159846	2161846	552	908	572	553	828	571	1	1	1	1	1	1
chr1	2161846	2163846	96	143	106	68	109	89	1	1	1	1	1	1
chr1	2163846	2165846	36	57	38	20	34	17	0	0	0	0	0	0
chr1	2165846	2168057	99	183	159	33	29	29	0	1	1	0	0	0
chr1	2177333	2178417	16	28	37	5	4	3	0	0	1	0	0	0
chr1	2221188	2223252	129	181	153	105	162	110	1	1	1	1	1	1
chr1	2230963	2233727	421	672	590	382	584	474	1	1	1	1	1	1
chr1	2245284	2247502	357	465	329	193	253	160	1	1	1	1	1	1
chr1	2318691	2320464	5	1	1	25	22	53	0	0	0	0	0	1
chr1	2321219	2323845	1324	1751	1155	1628	1698	1332	1	1	1	1	1	1
chr1	2323845	2325236	258	334	278	311	347	341	1	1	1	1	1	1
chr1	2342678	2344816	1096	1517	1065	1132	1222	1003	1	1	1	1	1	1
chr1	2344816	2346816	226	347	296	205	211	196	1	1	1	1	1	1
chr1	2346816	2348722	169	294	217	126	157	112	1	1	1	1	1	1
chr1	2455241	2456391	11	9	5	7	10	12	0	0	0	0	0	0
chr1	2456391	2459099	1045	1189	888	1209	1213	1027	1	1	1	1	1	1
chr1	2460021	2462442	50	86	51	52	72	73	0	1	0	0	1	1
chr1	2476869	2479229	837	1210	896	861	1082	846	1	1	1	1	1	1
chr1	2479229	2481229	407	616	534	499	589	475	1	1	1	1	1	1
chr1	2481229	2482680	17	40	38	70	101	80	0	1	1	1	1	1
chr1	2485957	2487187	90	122	90	70	124	68	1	1	1	1	1	1
chr1	2487187	2489187	1319	1873	1291	1342	1638	1290	1	1	1	1	1	1
chr1	2489187	2490188	10	18	5	20	26	19	0	0	0	0	0	0
chr1	2506813	2508560	20	39	44	111	140	117	0	0	1	1	1	1
chr1	2508560	2510991	316	400	383	830	920	720	1	1	1	1	1	1
chr1	2514728	2516626	62	58	81	79	102	74	0	0	0	0	1	0
chr1	2516626	2519584	1384	1748	1325	1501	1635	1303	1	1	1	1	1	1
chr1	2573092	2575203	572	881	672	623	800	627	1	1	1	1	1	1
chr1	2985952	2987245	12	21	15	20	31	24	0	0	0	0	1	1
chr1	3540253	3542913	746	1006	726	708	1003	767	1	1	1	1	1	1
chr1	3564777	3567365	616	913	685	697	785	702	1	1	1	1	1	1
chr1	3567365	3569365	487	865	611	849	985	755	1	1	1	1	1	1
chr1	3569365	3571365	449	683	551	690	764	669	1	1	1	1	1	1
chr1	3571365	3573365	247	279	374	320	354	404	1	1	1	1	1	1
chr1	3573365	3574665	76	107	128	126	168	159	1	1	1	1	1	1
chr1	3576159	3577849	42	28	26	70	44	83	0	0	0	0	0	1
chr1	3579648	3580820	35	79	84	55	92	73	1	1	1	1	1	1
chr1	3580820	3582820	276	339	465	404	407	477	1	1	1	1	1	1
chr1	3582820	3585072	132	184	258	200	250	284	1	1	1	1	1	1
chr1	3587521	3588817	2	9	5	25	17	16	0	0	0	0	0	0
chr1	3588817	3591573	106	146	142	386	470	378	1	1	1	1	1	1
chr1	3592477	3595596	145	186	196	199	238	228	0	0	1	1	1	1
chr1	3662689	3665023	526	737	545	307	372	362	1	1	1	1	1	1
chr1	3687960	3690094	231	370	244	222	323	230	1	1	1	1	1	1
chr1	3711081	3714404	1253	1447	1102	1076	1086	971	1	1	1	1	1	1
chr1	3720587	3721746	13	11	16	40	20	21	0	0	0	1	0	0
chr1	3772039	3773157	148	217	169	193	229	195	1	1	1	1	1	1
chr1	3773157	3775446	1173	1596	1063	1229	1344	1056	1	1	1	1	1	1
chr1	3809263	3810446	31	28	50	6	6	12	0	0	1	0	0	0
chr1	3815021	3816690	696	951	639	802	811	656	1	1	1	1	1	1
chr1	3816690	3818730	795	987	706	988	1017	806	1	1	1	1	1	1
chr1	4855897	4857584	32	44	41	14	20	22	0	0	0	0	0	0
chr1	6014139	6015622	79	70	77	15	6	19	1	1	1	0	0	0
chr1	6050784	6053404	1128	1435	974	1163	1253	1055	1	1	1	1	1	1
chr1	6053404	6055649	635	850	600	562	670	580	1	1	1	1	1	1
chr1	6084281	6085646	109	142	84	49	58	56	1	1	1	1	1	1
chr1	6085646	6087646	1036	1365	986	1124	1195	1105	1	1	1	1	1	1
chr1	6087646	6089646	251	324	302	262	320	316	1	1	1	1	1	1
chr1	6089646	6090686	6	4	6	8	5	3	0	0	0	0	0	0
chr1	6257063	6258463	189	199	237	170	143	250	1	1	1	1	1	1
chr1	6258463	6260927	1964	2333	1803	1995	1846	1940	1	1	1	1	1	1
chr1	6264485	6267751	1131	1615	967	986	1158	934	1	1	1	1	1	1
chr1	6268236	6270146	135	214	193	42	72	62	1	1	1	0	1	0
chr1	6293996	6297067	1174	1622	1173	1445	1413	1264	1	1	1	1	1	1
chr1	6305034	6306597	79	134	98	120	179	95	1	1	1	1	1	1
chr1	6308896	6309863	15	22	10	17	30	17	0	0	0	0	1	0
chr1	6319513	6322015	275	427	284	328	492	319	1	1	1	1	1	1
chr1	6418220	6420848	212	239	236	156	219	264	1	1	1	1	1	1
chr1	6451507	6454142	1068	1241	934	1132	1235	1042	1	1	1	1	1	1
chr1	6454142	6455364	234	257	238	184	216	217	1	1	1	1	1	1
chr1	6479113	6480761	46	79	59	60	99	67	1	1	1	1	1	1
chr1	6507004	6508228	31	59	54	14	39	33	0	1	1	0	1	1
chr1	6519900	6521315	57	76	56	25	62	35	1	1	1	0	1	0
chr1	6545135	6545892	13	27	14	1	4	3	0	1	0	0	0	0
chr1	6549783	6552100	962	1243	838	887	1063	820	1	1	1	1	1	1
chr1	6556844	6558311	84	111	76	21	32	47	1	1	1	0	1	1
chr1	6612638	6615611	946	1259	891	1033	1124	946	1	1	1	1	1	1
chr1	6639124	6641379	811	1098	764	920	1032	919	1	1	1	1	1	1
chr1	6641379	6642917	69	90	69	36	36	37	1	1	1	0	0	0
chr1	6658890	6661746	724	990	770	675	831	764	1	1	1	1	1	1
chr1	6661746	6664591	1286	1944	1295	1428	1712	1344	1	1	1	1	1	1
chr1	6672012	6673013	179	206	169	156	197	158	1	1	1	1	1	1
chr1	6673013	6675013	1473	1790	1358	1650	1809	1465	1	1	1	1	1	1
chr1	6675013	6676562	591	735	523	453	521	432	1	1	1	1	1	1
chr1	6684353	6686861	680	972	634	853	966	773	1	1	1	1	1	1
chr1	6759992	6762683	1001	1357	939	1041	1162	966	1	1	1	1	1	1
chr1	6836665	6838699	101	48	121	26	21	46	1	0	1	0	0	0
chr1	6838699	6840354	85	65	89	44	39	33	1	0	1	0	0	0
chr1	6842787	6845393	1322	1585	1186	1227	1215	1231	1	1	1	1	1	1
chr1	6845393	6847460	801	912	620	732	901	711	1	1	1	1	1	1
chr1	6880284	6881461	47	55	46	43	21	49	0	0	0	0	0	1
chr1	6882599	6884016	70	71	71	18	15	28	1	1	1	0	0	0
chr1	6920581	6923007	154	134	178	89	71	104	1	1	1	1	1	1
chr1	6928107	6929114	19	16	26	32	21	42	0	0	0	1	0	1
chr1	7021811	7023502	46	55	46	8	12	5	1	1	1	0	0	0
chr1	7165285	7166149	3	1	1	11	2	9	0	0	0	0	0	0
chr1	7462295	7465143	51	49	54	27	31	24	0	0	0	0	0	0
chr1	7466258	7469066	84	84	93	8	8	10	1	0	1	0	0	0
chr1	7608847	7610278	8	7	3	4	7	8	0	0	0	0	0	0
chr1	7739817	7741293	57	90	57	65	92	67	1	1	1	1	1	1
chr1	7763924	7765668	64	93	63	83	120	77	1	1	1	1	1	1
chr1	7813964	7815026	52	38	46	21	31	36	1	0	1	0	1	1
chr1	7830339	7832949	1042	1421	1005	1054	1283	990	1	1	1	1	1	1
chr1	7842599	7845065	404	365	371	294	306	308	1	1	1	1	1	1
chr1	7885522	7888147	977	981	797	5	6	4	1	1	1	0	0	0
chr1	7888147	7890569	260	232	268	11	6	15	1	1	1	0	0	0
chr1	7999469	8002493	151	176	120	38	30	53	1	1	1	0	0	0
chr1	8013222	8015612	1027	1202	1055	811	890	786	1	1	1	1	1	1
chr1	8020069	8022268	1291	1597	1262	1407	1263	1232	1	1	1	1	1	1
chr1	8022268	8024254	633	577	543	562	452	542	1	1	1	1	1	1
chr1	8053173	8055269	41	40	55	48	44	52	0	0	0	0	0	0
chr1	8085016	8087099	393	637	414	248	344	277	1	1	1	1	1	1
chr1	8156185	8158824	270	206	270	205	146	220	1	1	1	1	1	1
chr1	8180652	8181777	54	59	48	35	28	41	1	0	0	0	0	0
chr1	8276819	8278143	84	174	87	12	24	23	1	1	1	0	0	0
chr1	8341492	8344345	157	156	172	234	209	214	0	0	1	1	1	1
chr1	8377499	8379008	86	161	103	70	103	83	1	1	1	1	1	1
chr1	8454537	8456427	145	140	195	146	139	195	1	1	1	1	1	1
chr1	8456427	8458698	152	121	153	127	97	158	1	1	1	1	0	1
chr1	8479415	8480646	38	22	25	19	24	41	0	0	0	0	0	1
chr1	8480646	8482646	450	446	380	357	410	508	1	1	1	1	1	1
chr1	8482646	8485558	1543	1949	1568	1879	2059	1640	1	1	1	1	1	1
chr1	8486594	8489082	169	153	249	139	113	163	1	1	1	0	1	1
chr1	8532163	8535062	111	120	154	116	108	123	0	0	1	0	0	1
chr1	8553554	8555413	17	12	31	89	87	128	0	0	0	1	1	1
chr1	8569385	8571404	120	142	170	132	146	168	1	1	1	1	1	1
chr1	8583006	8584402	104	64	93	48	47	60	1	1	1	1	1	1
chr1	8584402	8586898	405	420	518	417	446	422	1	1	1	1	1	1
chr1	8592468	8594859	248	213	274	182	152	213	1	1	1	1	1	1
chr1	8663477	8665441	112	90	112	117	110	146	1	1	1	1	1	1
chr1	8683319	8684541	35	25	59	12	7	26	0	0	1	0	0	0
chr1	8688096	8690792	215	212	259	146	184	253	1	1	1	1	1	1
chr1	8720041	8721779	68	53	97	15	33	55	0	0	1	0	0	0
chr1	8721779	8723028	42	28	53	19	10	38	0	0	1	0	0	0
chr1	8723409	8725152	84	117	119	78	99	131	1	1	1	1	1	1
chr1	8739744	8742398	187	206	200	101	170	180	1	1	1	1	1	1
chr1	8759787	8762032	528	446	485	268	290	374	1	1	1	1	1	1
chr1	8762032	8764354	1203	1457	1146	1061	1126	1045	1	1	1	1	1	1
chr1	8772027	8774231	159	127	173	103	95	131	1	1	1	0	0	1
chr1	8787822	8789260	46	40	73	5	7	7	0	0	1	0	0	0
chr1	8822249	8824439	164	159	198	150	136	246	1	1	1	1	1	1
chr1	8824439	8825722	64	49	72	50	40	64	1	1	1	1	0	1
chr1	8873116	8874468	46	33	35	10	11	9	1	0	0	0	0	0
chr1	8874468	8876468	506	510	492	168	184	283	1	1	1	1	1	1
chr1	8876468	8879161	1900	2246	1716	1968	1982	1910	1	1	1	1	1	1
chr1	8931480	8933485	16	17	22	14	24	15	0	0	0	0	0	0
chr1	8933485	8935485	92	121	139	85	143	118	1	1	1	1	1	1
chr1	8935485	8937485	754	1043	793	1161	1210	1220	1	1	1	1	1	1
chr1	8937485	8939485	1743	2325	1735	2373	2353	2043	1	1	1	1	1	1
chr1	8939485	8941067	566	636	706	612	542	667	1	1	1	1	1	1
chr1	9121551	9124483	151	146	164	110	116	95	1	1	1	1	1	1
chr1	9124483	9126483	83	152	126	91	77	78	1	1	1	1	1	1
chr1	9126483	9128483	333	457	389	235	251	214	1	1	1	1	1	1
chr1	9128483	9131027	1210	1297	1220	1266	1028	1184	1	1	1	1	1	1
chr1	9134547	9137457	165	148	200	135	138	177	1	1	1	1	0	1
chr1	9139140	9142230	193	170	239	178	104	188	1	1	1	1	0	1
chr1	9181502	9183361	63	68	66	112	115	131	0	0	1	1	1	1
chr1	9187133	9189982	510	784	560	749	898	704	1	1	1	1	1	1
chr1	9189982	9191741	34	40	51	81	63	74	0	0	1	1	1	1
chr1	9222463	9224836	210	220	217	221	268	283	1	1	1	1	1	1
chr1	9224836	9226052	10	11	16	19	48	45	0	0	0	0	1	1
chr1	9238679	9240811	217	196	191	216	207	171	1	1	1	1	1	1
chr1	9240811	9242811	1822	2413	1504	2030	2088	1702	1	1	1	1	1	1
chr1	9242811	9244382	508	651	379	463	604	469	1	1	1	1	1	1
chr1	9258374	9259350	19	38	20	7	13	10	0	1	0	0	0	0
chr1	9260637	9263007	54	64	53	17	15	22	1	1	0	0	0	0
chr1	9293730	9296573	1023	1351	996	996	1202	951	1	1	1	1	1	1
chr1	9299033	9301019	104	96	135	27	36	42	1	1	1	0	0	0
chr1	9352147	9355101	410	603	400	707	863	562	1	1	1	1	1	1
chr1	9472485	9474685	134	177	178	150	157	152	1	1	1	1	1	1
chr1	9479654	9481703	29	30	36	90	78	84	0	0	0	1	1	1
chr1	9485270	9487580	138	168	212	165	181	201	1	1	1	1	1	1
chr1	9488090	9490162	362	372	351	343	357	356	1	1	1	1	1	1
chr1	9554944	9556211	36	66	36	44	61	56	0	0	0	1	1	1
chr1	9598571	9601578	1119	1478	977	1186	1308	1029	1	1	1	1	1	1
chr1	9601954	9603131	10	9	15	4	5	3	0	0	0	0	0	0
chr1	9614392	9616240	5	13	14	6	14	10	0	0	0	0	0	0
chr1	9619283	9621535	0	1	1	9	9	9	0	0	0	0	0	0
chr1	9647880	9650106	1055	1443	903	1200	1279	1062	1	1	1	1	1	1
chr1	9650106	9651899	164	218	153	114	135	129	1	1	1	1	1	1
chr1	9652814	9654188	53	49	58	17	19	14	0	1	1	0	0	0
chr1	9685531	9687258	249	348	334	213	198	236	1	1	1	1	1	1
chr1	9687258	9689258	623	993	738	508	571	545	1	1	1	1	1	1
chr1	9689258	9692147	1235	1459	1157	873	866	806	1	1	1	1	1	1
chr1	9698766	9699995	30	56	54	14	15	16	0	0	1	0	0	0
chr1	9703635	9704933	24	19	42	12	14	34	0	0	1	0	0	0
chr1	9704933	9705934	23	32	37	19	28	30	0	0	1	0	0	0
chr1	9710190	9711333	159	198	157	126	126	124	1	1	1	1	1	1
chr1	9711333	9713333	2004	2619	1766	2346	2387	1785	1	1	1	1	1	1
chr1	9713333	9715333	939	1099	911	987	991	884	1	1	1	1	1	1
chr1	9715333	9717333	217	228	201	290	320	288	1	1	1	1	1	1
chr1	9717333	9719244	72	77	66	97	105	98	0	0	0	1	1	1
chr1	9744638	9746468	42	47	53	28	31	35	0	0	1	0	0	0
chr1	9746468	9748468	823	1123	885	797	868	775	1	1	1	1	1	1
chr1	9748468	9750783	468	630	481	403	513	426	1	1	1	1	1	1
chr1	9776704	9778421	61	96	107	22	21	39	0	1	1	0	0	0
chr1	9819354	9820626	1	2	1	55	47	57	0	0	0	0	0	1
chr1	9846129	9848953	404	415	471	324	333	375	1	1	1	1	1	1
chr1	9878774	9880697	99	113	97	5	2	11	1	1	1	0	0	0
chr1	9880697	9882697	335	310	296	176	185	246	1	1	1	1	1	1
chr1	9882697	9885322	1614	2048	1426	1763	1931	1534	1	1	1	1	1	1
chr1	9909674	9911477	106	165	129	48	77	60	1	1	1	0	1	1
chr1	9923319	9925394	100	170	223	38	39	42	1	1	1	0	0	1
chr1	9952580	9954637	123	108	136	52	45	52	1	1	1	1	1	1
chr1	9968688	9969961	335	439	352	333	324	325	1	1	1	1	1	1
chr1	9969961	9971998	833	913	705	889	828	751	1	1	1	1	1	1
chr1	10001468	10002694	246	222	249	204	209	259	1	1	1	1	1	1
chr1	10002694	10005042	1779	2122	1711	1791	1901	1777	1	1	1	1	1	1
chr1	10009824	10011733	151	131	202	113	117	150	1	1	1	0	1	1
chr1	10056765	10058051	18	41	33	22	52	45	0	1	0	0	1	1
chr1	10078340	10079731	9	14	5	59	50	37	0	0	0	1	1	0
chr1	10091982	10094239	1004	1260	862	1046	1090	970	1	1	1	1	1	1
chr1	10094239	10095414	142	133	88	73	72	84	1	1	1	1	1	1
chr1	10268617	10271184	950	1211	698	1026	1087	799	1	1	1	1	1	1
chr1	10271184	10272685	162	259	148	160	213	162	1	1	1	1	1	1
chr1	10275747	10276981	22	28	20	27	38	37	0	0	0	0	0	0
chr1	10296602	10298119	60	42	62	22	25	38	0	0	1	0	0	0
chr1	10447854	10448928	22	16	25	13	7	16	0	0	0	0	0	0
chr1	10457770	10461146	1389	1869	1309	1530	1577	1287	1	1	1	1	1	1
chr1	10489553	10492177	875	1185	892	938	952	883	1	1	1	1	1	1
chr1	10530956	10533371	1156	1287	1016	1365	1288	1191	1	1	1	1	1	1
chr1	10533371	10535371	647	849	618	746	801	683	1	1	1	1	1	1
chr1	10535371	10536847	608	701	550	670	687	534	1	1	1	1	1	1
chr1	10554487	10556283	162	150	169	114	137	160	1	1	1	1	1	1
chr1	10570120	10572427	143	138	149	164	127	198	1	1	1	1	1	1
chr1	10654226	10655765	15	17	18	44	47	32	0	0	0	0	1	0
chr1	10751599	10753311	14	16	11	24	24	27	0	0	0	0	0	0
chr1	10753311	10755821	832	1191	855	986	1261	1005	1	1	1	1	1	1
chr1	10854148	10857048	105	203	106	127	196	150	1	1	1	1	1	1
chr1	10926601	10928026	48	82	61	51	73	56	1	1	1	0	1	1
chr1	11024299	11027171	194	156	307	204	195	213	1	1	1	1	1	1
chr1	11027383	11029902	71	73	78	226	241	255	0	0	0	1	1	1
chr1	11044397	11047466	163	175	190	279	228	321	0	0	1	1	1	1
chr1	11071438	11073933	1225	1599	1163	1462	1479	1392	1	1	1	1	1	1
chr1	11073933	11075239	64	72	70	89	109	118	1	1	1	1	1	1
chr1	11083561	11085715	10	8	10	25	23	18	0	0	0	0	0	0
chr1	11117649	11119540	495	716	462	563	741	591	1	1	1	1	1	1
chr1	11119540	11121540	1487	1719	1315	1610	1608	1389	1	1	1	1	1	1
chr1	11121540	11123939	72	62	71	87	65	99	0	0	0	1	0	1
chr1	11131997	11134387	33	23	31	152	147	121	0	0	0	1	1	1
chr1	11158120	11160848	1220	1462	1048	1305	1352	1189	1	1	1	1	1	1
chr1	11286250	11288579	87	121	161	149	137	233	1	1	1	1	1	1
chr1	11320847	11323864	1296	1512	1086	1467	1513	1262	1	1	1	1	1	1
chr1	11332323	11334711	1246	1581	1134	1347	1359	1241	1	1	1	1	1	1
chr1	11334711	11336711	247	235	257	204	185	246	1	1	1	1	1	1
chr1	11336711	11338072	11	5	4	9	7	5	0	0	0	0	0	0
chr1	11538546	11540117	109	152	106	108	160	143	1	1	1	1	1	1
chr1	11713883	11716078	388	549	383	657	772	629	1	1	1	1	1	1
chr1	11723447	11725946	666	864	561	689	781	619	1	1	1	1	1	1
chr1	11739824	11742510	957	1357	964	1063	1281	1017	1	1	1	1	1	1
chr1	11778910	11780419	122	201	143	84	144	112	1	1	1	1	1	1
chr1	11790377	11792447	61	81	109	16	30	28	0	0	1	0	0	0
chr1	11795540	11797894	860	1055	798	678	764	659	1	1	1	1	1	1
chr1	11844718	11845887	28	47	21	29	51	42	0	0	0	0	1	0
chr1	11861873	11864670	215	298	236	253	285	257	1	1	1	1	1	1
chr1	11864670	11866670	1461	1814	1356	1446	1626	1236	1	1	1	1	1	1
chr1	11866670	11869006	547	538	534	549	565	559	1	1	1	1	1	1
chr1	11874012	11876216	223	217	258	168	160	193	1	1	1	1	1	1
chr1	11967554	11970548	399	612	485	471	461	453	1	1	1	1	1	1
chr1	11983507	11985203	285	331	272	273	332	238	1	1	1	1	1	1
chr1	11985203	11987653	829	893	771	828	819	706	1	1	1	1	1	1
chr1	11993638	11996376	954	1148	940	921	1055	894	1	1	1	1	1	1
chr1	12039417	12042061	875	1119	822	1034	1120	935	1	1	1	1	1	1
chr1	12078341	12081348	1143	1516	1006	1431	1473	1203	1	1	1	1	1	1
chr1	12098988	12101841	136	152	171	180	197	244	0	0	1	1	1	1
chr1	12104915	12106885	35	39	66	90	58	92	0	0	0	1	0	1
chr1	12106885	12109206	128	170	188	175	192	239	0	1	1	1	1	1
chr1	12111288	12113834	81	116	157	199	187	210	0	0	1	1	1	1
chr1	12118852	12121073	51	44	39	58	63	64	0	0	0	0	0	0
chr1	12122461	12124806	1196	1554	1048	1997	1930	1682	1	1	1	1	1	1
chr1	12124806	12126806	543	503	306	1404	1140	1011	1	1	1	1	1	1
chr1	12126806	12128806	194	216	184	627	694	567	1	1	1	1	1	1
chr1	12128806	12130806	70	70	54	140	192	131	1	1	1	1	1	1
chr1	12130806	12132267	26	11	15	43	47	27	0	0	0	1	1	1
chr1	12136542	12138596	23	20	9	200	225	187	0	0	0	1	1	1
chr1	12138596	12140674	101	137	122	317	353	345	0	1	1	1	1	1
chr1	12208127	12210114	114	87	150	125	116	158	0	0	1	0	0	1
chr1	12210114	12212114	87	74	119	91	67	105	0	0	1	0	0	1
chr1	12212114	12214287	77	68	122	75	72	118	0	0	1	0	0	1
chr1	12216833	12219046	116	86	139	98	65	94	1	0	1	0	0	0
chr1	12221188	12222631	53	55	56	48	50	78	0	0	1	0	1	1
chr1	12222631	12224386	35	48	82	77	95	86	0	0	1	0	1	1
chr1	12226154	12228304	1214	1914	1222	1605	1726	1420	1	1	1	1	1	1
chr1	12228304	12230245	142	269	167	205	234	161	1	1	1	1	1	1
chr1	12232406	12234400	21	19	22	24	17	22	0	0	0	0	0	0
chr1	12289434	12292040	930	1250	814	1065	1336	937	1	1	1	1	1	1
chr1	12404091	12406272	118	127	157	64	60	96	1	1	1	0	0	1
chr1	12493745	12495194	19	19	23	21	25	36	0	0	0	0	0	0
chr1	12495194	12496841	28	32	35	32	42	45	0	0	0	0	0	0
chr1	12532560	12533962	45	47	52	27	29	40	0	0	0	0	0	0
chr1	12654790	12655708	6	9	2	1	9	10	0	0	0	0	0	0
chr1	12675473	12677199	23	41	13	38	73	34	0	0	0	0	1	0
chr1	12677199	12679199	263	472	212	294	427	306	1	1	1	1	1	1
chr1	12679199	12680403	20	47	9	29	34	24	0	1	0	0	0	0
chr1	13856230	13857527	1	3	4	44	57	51	0	0	0	0	1	1
chr1	13993299	13995091	94	88	72	52	54	83	1	1	0	0	0	0
chr1	14025296	14027506	1454	1889	1351	1540	1703	1380	1	1	1	1	1	1
chr1	14027506	14029506	1369	1198	1044	1111	964	1327	1	1	1	1	1	1
chr1	14029506	14031506	362	362	311	235	249	323	1	1	1	1	1	1
chr1	14031506	14034458	203	191	152	34	33	41	1	1	1	0	0	0
chr1	14038861	14041509	315	345	388	177	204	231	1	1	1	1	1	1
chr1	14054163	14056928	201	156	228	180	189	299	1	0	0	1	1	1
chr1	14056928	14058928	533	527	628	414	493	557	1	1	1	1	1	1
chr1	14058928	14060639	149	178	168	109	152	144	1	1	1	1	1	1
chr1	14074470	14077306	1610	1895	1408	1736	1765	1667	1	1	1	1	1	1
chr1	14077306	14079306	291	254	186	404	371	412	1	1	1	1	1	1
chr1	14079306	14081306	62	65	98	122	116	151	0	0	1	1	1	1
chr1	14081306	14082384	11	10	14	11	8	19	0	0	0	0	0	0
chr1	14107611	14109717	1	6	2	85	85	52	0	0	0	1	1	0
chr1	14219077	14220333	5	4	2	1	1	0	0	0	0	0	0	0
chr1	14842881	14844745	23	6	16	50	34	44	0	0	0	1	0	0
chr1	14846859	14848330	7	18	18	50	43	63	0	0	0	0	0	1
chr1	14924040	14926636	152	204	95	162	172	156	1	1	1	1	1	1
chr1	14926636	14927761	22	21	18	20	18	21	0	0	0	0	0	0
chr1	15057975	15059528	2	0	0	29	11	16	0	0	0	0	0	0
chr1	15059528	15061528	11	4	4	53	53	46	0	0	0	0	0	0
chr1	15061528	15063090	2	2	2	26	20	16	0	0	0	0	0	0
chr1	15249838	15252493	41	64	53	80	97	84	1	1	1	1	1	1
chr1	15478747	15481767	286	480	422	40	48	110	1	1	1	1	1	1
chr1	15482376	15483869	60	60	65	16	17	43	0	0	1	0	0	1
chr1	15573177	15574498	73	138	78	15	24	27	1	1	1	0	0	1
chr1	15710405	15711939	43	88	59	64	85	61	0	1	1	1	1	1
chr1	15735302	15737606	1401	1901	1268	1558	1584	1281	1	1	1	1	1	1
chr1	15737606	15740103	541	623	410	506	493	403	1	1	1	1	1	1
chr1	15741525	15742920	79	67	76	81	69	89	1	1	1	1	1	1
chr1	15742920	15744997	128	136	139	196	169	167	1	1	1	1	1	1
chr1	15849117	15850518	517	629	520	307	373	286	1	1	1	1	1	1
chr1	15850518	15852518	882	837	758	704	702	612	1	1	1	1	1	1
chr1	15852518	15854871	1141	1402	1043	1153	1270	1187	1	1	1	1	1	1
chr1	15905400	15906989	68	54	82	78	80	85	0	0	1	0	1	1
chr1	15910079	15912309	328	591	429	188	268	259	1	1	1	1	1	1
chr1	15929030	15930972	371	471	352	151	237	182	1	1	1	1	1	1
chr1	15942646	15945228	1591	1907	1481	1735	1718	1631	1	1	1	1	1	1
chr1	15945228	15947228	390	411	391	334	369	391	1	1	1	1	1	1
chr1	15947228	15948363	23	16	14	15	4	18	0	0	0	0	0	0
chr1	15953654	15955047	52	34	36	28	25	40	0	0	0	0	0	0
chr1	16009739	16011553	971	1634	1021	1057	1516	1058	1	1	1	1	1	1
chr1	16011553	16013146	326	314	287	285	358	319	1	1	1	1	1	1
chr1	16022847	16025577	247	363	431	254	302	349	1	1	1	1	1	1
chr1	16156426	16158601	82	77	92	68	91	92	1	0	1	0	1	1
chr1	16159134	16160781	653	733	692	549	495	635	1	1	1	1	1	1
chr1	16160781	16162781	1376	1985	1530	1541	1638	1462	1	1	1	1	1	1
chr1	16162781	16164908	130	244	192	493	634	473	1	1	1	1	1	1
chr1	16169251	16170457	61	53	85	47	47	50	1	1	1	1	1	1
chr1	16170457	16172457	353	397	415	366	312	368	1	1	1	1	1	1
chr1	16172457	16174457	626	839	703	727	780	638	1	1	1	1	1	1
chr1	16174457	16176457	2024	2773	1885	2691	2682	2212	1	1	1	1	1	1
chr1	16176457	16178457	781	827	777	570	505	647	1	1	1	1	1	1
chr1	16178457	16180196	204	165	233	117	122	147	1	1	1	1	1	1
chr1	16211269	16213854	136	198	192	144	185	190	1	1	1	1	1	1
chr1	16242058	16244520	32	34	21	127	127	141	0	0	0	1	1	1
chr1	16245227	16247050	48	49	56	77	57	84	0	0	0	0	0	1
chr1	16274249	16276650	102	165	148	104	156	142	0	1	1	0	1	1
chr1	16276650	16277816	32	47	34	25	49	50	0	1	1	0	1	1
chr1	16288938	16291247	266	272	338	210	261	322	1	1	1	1	1	1
chr1	16291247	16294106	409	450	518	413	429	561	1	1	1	1	1	1
chr1	16299928	16301397	55	92	57	123	144	144	0	1	0	1	1	1
chr1	16301397	16303592	1075	1151	908	1171	1032	983	1	1	1	1	1	1
chr1	16338589	16340746	148	284	220	118	192	170	1	1	1	1	1	1
chr1	16399412	16400902	53	95	70	48	80	48	0	1	1	0	1	0
chr1	16480619	16483032	124	214	117	55	144	86	1	1	1	0	1	1
chr1	16493599	16495252	192	284	208	100	139	110	1	1	1	1	1	1
chr1	16532307	16534515	343	446	354	326	376	332	1	1	1	1	1	1
chr1	16542305	16544709	167	258	195	205	277	234	1	1	1	1	1	1
chr1	16553297	16554435	33	48	31	1	3	3	1	1	1	0	0	0
chr1	16562146	16564812	685	835	698	717	788	736	1	1	1	1	1	1
chr1	16647891	16649726	70	69	76	57	51	87	0	0	0	0	0	1
chr1	16675545	16677612	116	110	90	74	86	66	0	0	1	0	0	0
chr1	16677612	16680510	1553	1982	1536	1708	1802	1622	1	1	1	1	1	1
chr1	16692667	16695122	1474	1785	1362	1788	1728	1617	1	1	1	1	1	1
chr1	16695122	16697122	311	251	219	353	320	346	1	1	1	1	1	1
chr1	16697122	16699224	25	20	24	43	27	51	0	0	0	0	0	0
chr1	16712511	16714723	273	285	358	278	332	363	1	1	1	1	1	1
chr1	16714723	16715818	37	36	60	43	43	76	1	1	1	1	1	1
chr1	16735028	16735917	2	2	1	9	10	9	0	0	0	0	0	0
chr1	16766242	16768491	1182	1545	1070	1441	1598	1308	1	1	1	1	1	1
chr1	16768491	16770160	62	55	45	111	108	105	1	1	1	1	1	1
chr1	16776638	16779238	43	31	18	145	128	130	0	0	0	1	1	1
chr1	17336033	17337174	53	50	68	56	26	52	1	1	1	1	1	1
chr1	17337174	17339222	677	919	635	713	779	649	1	1	1	1	1	1
chr1	17378653	17381603	1134	1165	960	1151	1032	1036	1	1	1	1	1	1
chr1	17445093	17446827	66	76	48	69	131	73	1	1	1	1	1	1
chr1	17465911	17467392	15	19	23	52	42	58	0	0	0	1	0	1
chr1	17467392	17469447	135	117	168	155	135	196	1	1	1	1	1	1
chr1	17600877	17602368	10	14	9	50	48	51	0	0	0	0	0	0
chr1	17682314	17683263	2	1	2	3	5	2	0	0	0	0	0	0
chr1	17757793	17759536	51	59	65	76	64	94	0	0	1	0	0	1
chr1	17761457	17763836	210	261	177	291	303	284	0	1	1	1	0	1
chr1	17763836	17765836	1679	2199	1433	1968	1960	1598	1	1	1	1	1	1
chr1	17765836	17768627	552	618	530	574	566	471	1	1	1	0	1	1
chr1	17865535	17867514	82	198	148	87	166	119	1	1	1	1	1	1
chr1	18608751	18611420	5	5	7	187	155	152	0	0	0	1	1	1
chr1	18667098	18668816	2	4	2	17	9	14	0	0	0	0	0	0
chr1	19227329	19230469	944	1273	930	1042	1039	913	1	1	1	1	1	1
chr1	19252401	19255509	579	793	751	413	433	507	1	1	1	1	1	1
chr1	19274629	19275897	4	8	3	5	11	12	0	0	0	0	0	0
chr1	19275897	19277897	595	788	671	455	541	511	1	1	1	1	1	1
chr1	19277897	19279897	123	134	122	111	119	140	1	1	1	1	1	1
chr1	19279897	19281897	139	143	129	134	147	145	1	1	1	1	1	1
chr1	19281897	19284274	938	1574	957	1096	1257	1013	1	1	1	1	1	1
chr1	19492112	19493588	10	11	7	4	3	6	0	0	0	0	0	0
chr1	19493588	19495588	12	8	9	6	7	15	0	0	0	0	0	0
chr1	19495588	19497276	102	72	84	87	55	87	1	0	1	1	0	1
chr1	19530527	19531617	14	12	12	10	11	17	0	0	0	0	0	0
chr1	19531617	19533617	54	41	30	38	21	54	0	0	0	0	0	1
chr1	19533617	19535617	167	140	109	153	159	227	1	1	0	0	1	1
chr1	19535617	19537617	2122	2353	1884	2216	2127	1992	1	1	1	1	1	1
chr1	19537617	19540103	409	427	422	422	425	473	1	1	1	1	1	1
chr1	19576381	19578755	1607	1937	1542	1771	1687	1642	1	1	1	1	1	1
chr1	19578755	19580892	586	698	540	617	594	684	1	1	1	1	1	1
chr1	19614748	19616078	27	102	59	2	5	4	0	1	1	0	0	0
chr1	19637109	19640048	1212	1761	1263	1286	1526	1272	1	1	1	1	1	1
chr1	19640048	19642048	71	86	99	63	44	70	0	1	1	0	0	1
chr1	19642048	19643200	36	46	41	39	33	54	0	1	1	0	0	1
chr1	19716697	19719056	168	240	211	143	169	211	1	1	1	1	1	1
chr1	19785296	19787059	48	54	65	59	67	87	0	0	0	0	0	1
chr1	19794601	19797014	47	55	77	79	147	112	0	0	0	0	1	0
chr1	19802489	19805469	194	208	220	160	209	247	1	1	1	1	1	1
chr1	19807380	19808741	10	7	2	7	3	2	0	0	0	0	0	0
chr1	19808741	19810741	193	244	199	216	263	238	1	1	1	1	1	1
chr1	19810741	19812741	1787	2502	1672	2052	2311	1854	1	1	1	1	1	1
chr1	19812741	19814009	261	430	276	319	365	327	1	1	1	1	1	1
chr1	19831677	19833028	25	51	50	14	23	32	0	1	1	0	0	0
chr1	19922085	19924767	1803	1995	1641	1779	1692	1775	1	1	1	1	1	1
chr1	19924767	19926767	113	96	84	88	73	101	0	0	0	0	0	0
chr1	19926767	19928194	10	10	14	11	9	7	0	0	0	0	0	0
chr1	19969877	19972477	363	558	416	203	288	256	1	1	1	1	1	1
chr1	19990640	19992305	104	122	85	29	45	47	1	1	1	0	1	1
chr1	20124816	20127740	785	1130	879	816	1021	949	1	1	1	1	1	1
chr1	20208095	20210066	892	1264	928	1111	1272	1080	1	1	1	1	1	1
chr1	20210066	20211403	21	14	23	22	26	29	0	0	0	0	0	0
chr1	20404141	20406193	68	71	94	47	41	53	0	0	1	0	0	0
chr1	20406193	20408384	133	140	154	31	42	59	1	1	1	0	0	1
chr1	20478258	20479203	49	91	53	25	34	41	1	1	1	0	0	1
chr1	20511755	20513538	193	320	197	30	43	49	1	1	1	0	1	1
chr1	20833045	20835698	1110	1436	1074	1192	1255	1151	1	1	1	1	1	1
chr1	20959304	20961496	619	816	652	575	693	552	1	1	1	1	1	1
chr1	20985198	20986682	57	48	45	52	61	60	1	1	0	1	1	1
chr1	20986682	20989268	1775	2167	1707	1949	2165	1804	1	1	1	1	1	1
chr1	21022579	21023994	278	435	345	207	250	233	1	1	1	1	1	1
chr1	21043633	21045123	85	117	61	46	60	64	1	1	1	1	1	1
chr1	21057603	21060320	481	771	538	441	670	528	1	1	1	1	1	1
chr1	21110528	21112612	850	800	694	931	796	859	1	1	1	1	1	1
chr1	21112612	21115296	1878	2324	1760	2091	2172	1879	1	1	1	1	1	1
chr1	21318606	21320198	92	57	83	41	58	56	1	0	1	0	0	0
chr1	21347951	21350010	292	228	247	228	217	307	1	1	1	1	1	1
chr1	21500249	21501481	183	173	167	114	80	142	1	1	1	1	1	1
chr1	21501481	21504424	2019	2094	1673	1901	1871	1757	1	1	1	1	1	1
chr1	21614308	21616072	62	92	37	291	400	176	0	0	0	1	1	1
chr1	21616072	21618072	530	790	529	877	974	600	1	1	1	1	1	1
chr1	21618072	21620072	167	196	201	255	249	239	1	1	1	1	1	1
chr1	21620072	21622894	353	488	531	508	560	479	1	1	1	1	1	1
chr1	21650802	21653127	52	56	57	83	121	91	0	0	0	0	1	0
chr1	21660105	21663005	213	326	301	239	315	237	1	1	1	1	1	1
chr1	21668954	21670798	68	64	52	240	278	213	1	1	1	1	1	1
chr1	21670798	21673735	780	1055	682	1280	1261	955	1	1	1	1	1	1
chr1	21723985	21724764	5	9	3	17	14	13	0	0	0	0	0	0
chr1	21754272	21755352	26	30	29	29	38	35	1	1	1	1	1	1
chr1	21765707	21767967	419	548	363	74	102	71	1	1	1	1	1	1
chr1	21977516	21978703	33	40	38	26	43	22	1	1	1	1	1	0
chr1	21995537	21996733	19	39	27	7	24	15	0	0	0	0	0	0
chr1	22087318	22090080	303	259	326	327	304	401	1	1	1	1	1	1
chr1	22090080	22092092	67	64	88	84	92	123	1	1	1	1	1	1
chr1	22104404	22106961	445	359	413	470	412	527	1	1	1	1	1	1
chr1	22106961	22108961	1679	1682	1487	1836	1799	1813	1	1	1	1	1	1
chr1	22108961	22110941	1549	1904	1407	1887	1616	1484	1	1	1	1	1	1
chr1	22117461	22118853	21	20	32	56	32	35	0	0	0	1	0	0
chr1	22140215	22141701	87	161	136	41	79	54	1	1	1	1	1	1
chr1	22178700	22179762	31	35	43	8	16	17	0	0	1	0	0	0
chr1	22262819	22264807	180	275	180	128	179	138	1	1	1	1	1	1
chr1	22350052	22351184	151	199	164	103	141	106	1	1	1	1	1	1
chr1	22351184	22353184	1599	1871	1626	1551	1519	1418	1	1	1	1	1	1
chr1	22353184	22354666	150	125	139	208	175	231	1	1	1	1	1	1
chr1	22365532	22367483	132	143	208	138	142	216	1	1	1	1	1	1
chr1	22368633	22369850	46	46	52	52	30	52	0	0	0	0	0	0
chr1	22378261	22380371	1521	1605	1233	1640	1673	1418	1	1	1	1	1	1
chr1	22380371	22382371	297	402	308	346	396	379	1	1	1	1	1	1
chr1	22382371	22384087	71	58	70	63	68	86	1	1	1	1	1	1
chr1	22400670	22402757	91	53	79	73	54	77	1	0	0	1	0	1
chr1	22414820	22417245	118	88	98	66	54	74	1	0	1	0	0	0
chr1	22444711	22445658	25	25	21	30	45	40	0	0	0	0	1	0
chr1	22468551	22470814	122	222	134	119	207	142	1	1	1	1	1	1
chr1	22502852	22503750	36	32	23	25	27	31	0	0	0	0	0	0
chr1	22754865	22756548	4	7	1	232	240	221	0	0	0	1	1	1
chr1	22777378	22780102	1018	1357	1034	1159	1153	1040	1	1	1	1	1	1
chr1	23036362	23038506	119	213	110	184	248	181	1	1	1	1	1	1
chr1	23038506	23039666	34	35	31	20	25	32	1	1	1	0	1	1
chr1	23344633	23347306	1586	1976	1560	2052	1950	1815	1	1	1	1	1	1
chr1	23347306	23349306	234	257	228	398	325	428	1	1	1	1	1	1
chr1	23349306	23351393	29	10	14	35	16	25	0	0	0	0	0	0
chr1	23352752	23354427	25	13	14	70	42	48	0	0	0	1	0	0
chr1	23355093	23356775	57	34	45	126	132	175	1	0	1	1	1	1
chr1	23356775	23358775	79	81	90	388	344	527	1	0	1	1	1	1
chr1	23358775	23361348	35	38	39	403	373	451	0	0	0	1	1	1
chr1	23439639	23441524	54	63	97	74	58	88	0	0	1	1	0	1
chr1	23493147	23494152	156	186	123	123	142	123	1	1	1	1	1	1
chr1	23494152	23496878	1181	1388	1028	1674	1746	1519	1	1	1	1	1	1
chr1	23503267	23505225	281	429	329	257	348	309	1	1	1	1	1	1
chr1	23510913	23511472	6	13	16	20	23	19	0	0	0	0	0	0
chr1	23543112	23544511	47	81	51	39	69	47	1	1	1	1	1	1
chr1	23664153	23665306	9	5	4	5	2	4	0	0	0	0	0	0
chr1	23665306	23667306	100	84	69	65	47	83	1	0	0	0	0	1
chr1	23667306	23669306	606	521	500	565	521	765	1	1	1	1	1	1
chr1	23669306	23672256	2036	2502	1783	2268	2241	2166	1	1	1	1	1	1
chr1	23693499	23697089	1996	2386	1869	2163	2219	2019	1	1	1	1	1	1
chr1	23750643	23751826	31	61	27	10	32	21	1	1	0	0	1	0
chr1	23809648	23811932	312	381	320	320	409	388	1	1	1	1	1	1
chr1	23850538	23852549	94	93	113	150	164	133	1	1	1	1	1	1
chr1	23852549	23854549	33	27	48	51	81	64	0	0	0	0	0	0
chr1	23854549	23856549	444	491	537	673	630	636	1	1	1	1	1	1
chr1	23856549	23858863	1032	1426	1108	1341	1426	1239	1	1	1	1	1	1
chr1	23880128	23882693	470	665	588	446	604	543	1	1	1	1	1	1
chr1	23882693	23884693	471	534	616	469	441	432	1	1	1	1	1	1
chr1	23884693	23887248	1530	2129	1631	1707	1832	1589	1	1	1	1	1	1
chr1	23888375	23889684	46	56	65	35	38	44	0	0	1	0	0	0
chr1	23893734	23895690	164	393	266	190	280	220	1	1	1	1	1	1
chr1	23901993	23904609	308	231	428	279	254	415	1	1	1	1	1	1
chr1	23904609	23905728	69	55	100	61	34	83	1	1	1	1	1	1
chr1	23915441	23918260	131	148	255	145	145	194	1	1	1	1	1	1
chr1	23918260	23920260	168	161	238	200	220	219	1	1	1	1	1	1
chr1	23920260	23922599	161	159	228	226	195	270	1	1	1	1	1	1
chr1	23925743	23927043	38	61	61	26	23	23	0	1	1	0	0	0
chr1	23927043	23929960	141	189	305	98	83	153	0	1	1	0	0	1
chr1	23938277	23941105	151	147	225	154	160	168	0	0	1	0	0	0
chr1	23945082	23947608	274	363	388	335	390	347	1	1	1	1	1	1
chr1	23950661	23952576	64	74	114	80	76	92	1	1	1	0	0	1
chr1	23952862	23954494	31	46	74	84	71	85	0	0	1	0	0	1
chr1	23961297	23962494	48	51	70	73	79	82	0	0	1	1	1	1
chr1	24017354	24019551	1878	2063	1639	2080	1887	1830	1	1	1	1	1	1
chr1	24019551	24021551	519	462	398	381	341	534	1	1	1	1	1	1
chr1	24021551	24023551	61	34	48	49	30	51	1	0	0	0	0	1
chr1	24023551	24025141	12	4	11	16	7	13	0	0	0	0	0	0
chr1	24045119	24048081	200	197	263	170	172	221	1	1	1	0	0	1
chr1	24048081	24050727	51	41	57	104	84	140	0	0	0	1	1	1
chr1	24052364	24053491	27	22	53	17	18	21	0	0	1	0	0	0
chr1	24053491	24055967	183	183	256	200	184	249	1	1	1	1	1	1
chr1	24068758	24071124	1845	2509	1665	2261	2388	1790	1	1	1	1	1	1
chr1	24071124	24072966	601	616	524	583	514	553	1	1	1	1	1	1
chr1	24073142	24075477	23	20	26	14	6	15	0	0	0	0	0	0
chr1	24103245	24105579	1375	1734	1282	1556	1578	1452	1	1	1	1	1	1
chr1	24105579	24107103	170	195	182	193	179	220	1	1	1	1	1	1
chr1	24116562	24119406	1143	1315	1065	1217	1279	1108	1	1	1	1	1	1
chr1	24125334	24126614	227	343	223	280	329	285	1	1	1	1	1	1
chr1	24126614	24128569	1150	1553	1070	1430	1495	1229	1	1	1	1	1	1
chr1	24150407	24153275	1202	1507	1279	1703	1664	1602	1	1	1	1	1	1
chr1	24164422	24166055	66	100	71	102	112	88	1	1	1	1	1	1
chr1	24190580	24191613	11	10	15	5	10	6	0	0	0	0	0	0
chr1	24191613	24193613	153	182	131	156	125	148	1	1	1	1	1	1
chr1	24193613	24196308	1013	1399	907	1027	1203	973	1	1	1	1	1	1
chr1	24212977	24215315	403	357	404	336	260	341	1	1	1	1	1	1
chr1	24215315	24216945	103	97	133	110	99	137	1	1	1	1	1	1
chr1	24222836	24225153	57	73	82	97	79	132	0	0	0	1	0	1
chr1	24228930	24229948	47	82	68	51	57	68	1	1	1	1	1	1
chr1	24229948	24231948	91	93	109	95	73	118	1	1	1	1	0	1
chr1	24231948	24233948	83	76	123	121	108	159	1	0	1	1	1	1
chr1	24233948	24235948	321	332	446	389	418	458	1	1	1	1	1	1
chr1	24235948	24237948	882	883	1011	1022	925	1076	1	1	1	1	1	1
chr1	24237948	24240888	1543	1780	1659	1643	1572	1630	1	1	1	1	1	1
chr1	24242535	24243552	40	34	45	35	33	46	0	0	0	0	0	1
chr1	24256813	24258901	91	111	129	154	126	187	1	1	1	1	1	1
chr1	24283825	24285617	558	555	569	503	458	546	1	1	1	1	1	1
chr1	24285617	24287617	2401	2850	2283	2801	2412	2577	1	1	1	1	1	1
chr1	24287617	24289617	317	336	290	337	266	389	1	1	1	1	1	1
chr1	24289617	24292461	191	111	88	115	117	191	1	0	0	1	0	1
chr1	24299680	24301662	74	67	80	30	28	37	1	1	1	0	0	0
chr1	24301662	24303662	195	142	149	45	58	89	1	1	1	0	0	1
chr1	24303662	24305662	881	831	678	744	608	870	1	1	1	1	1	1
chr1	24305662	24308307	1550	1750	1392	1698	1515	1559	1	1	1	1	1	1
chr1	24512000	24514543	730	1150	808	966	1296	1018	1	1	1	1	1	1
chr1	24514543	24516543	173	194	200	236	237	330	1	1	1	1	1	1
chr1	24516543	24519255	149	164	194	217	213	329	1	1	1	1	1	1
chr1	24529537	24530966	35	38	42	36	52	67	0	0	0	0	0	0
chr1	24552597	24555767	126	117	200	121	120	202	1	0	1	0	0	1
chr1	24645274	24647137	173	148	55	85	78	80	1	1	0	1	1	1
chr1	24647552	24649742	256	462	234	256	449	337	1	1	1	1	1	1
chr1	24717169	24719253	346	311	351	309	284	385	1	1	1	1	1	1
chr1	24719253	24720415	48	32	58	54	36	73	1	0	1	1	1	1
chr1	24738990	24741082	453	610	406	577	616	450	1	1	1	1	1	1
chr1	24741082	24743082	753	919	692	750	828	669	1	1	1	1	1	1
chr1	24743082	24744648	134	173	153	124	141	140	1	1	1	1	1	1
chr1	24827676	24830595	668	890	594	670	850	599	1	1	1	1	1	1
chr1	24860952	24863256	101	141	130	133	154	168	1	1	1	1	1	1
chr1	24967658	24970233	1622	2165	1511	1702	1735	1554	1	1	1	1	1	1
chr1	24970233	24973162	939	1061	879	994	1024	1068	1	1	1	1	1	1
chr1	25031241	25032585	36	29	56	48	52	56	0	0	1	0	1	1
chr1	25048831	25049470	4	6	4	1	1	3	0	0	0	0	0	0
chr1	25053244	25054727	79	74	92	88	65	92	0	0	1	0	0	0
chr1	25059071	25060669	63	51	81	46	50	50	0	0	1	0	0	0
chr1	25068355	25069759	38	34	52	26	27	23	0	0	1	0	0	0
chr1	25069759	25071759	148	196	211	143	175	202	1	1	1	1	1	1
chr1	25071759	25073759	2007	2321	1752	2289	2303	1805	1	1	1	1	1	1
chr1	25073759	25075759	730	773	807	813	824	768	1	1	1	1	1	1
chr1	25075759	25076856	78	73	100	67	61	66	1	1	1	1	1	1
chr1	25173962	25175882	203	433	289	222	330	268	1	1	1	1	1	1
chr1	25246300	25248183	107	115	143	20	34	45	1	1	1	0	0	0
chr1	25248183	25250183	103	121	145	23	33	33	1	1	1	0	0	0
chr1	25250183	25252183	206	230	206	215	242	259	1	1	1	1	1	1
chr1	25252183	25254183	532	788	525	952	1139	887	1	1	1	1	1	1
chr1	25254183	25256183	1920	2589	1676	2418	2561	2028	1	1	1	1	1	1
chr1	25256183	25258183	655	701	490	752	815	564	1	1	1	1	1	1
chr1	25258183	25259721	22	35	30	34	58	45	0	0	0	0	0	0
chr1	25261385	25263263	48	51	46	24	27	27	0	0	0	0	0	0
chr1	25273120	25275909	74	135	136	194	235	186	0	1	1	1	1	1
chr1	25278607	25281562	78	79	110	90	79	94	0	0	1	0	0	0
chr1	25281562	25283562	40	33	50	37	45	44	0	0	0	0	0	0
chr1	25283562	25285562	63	91	77	59	62	59	0	0	0	1	0	0
chr1	25285562	25287562	15	17	8	22	22	7	0	0	0	0	0	0
chr1	25287562	25289562	180	227	142	159	119	92	1	1	1	1	1	1
chr1	25289562	25291562	1236	1725	1275	511	551	525	1	1	1	1	1	1
chr1	25291562	25293439	86	112	126	68	66	75	1	1	1	0	0	1
chr1	25347768	25348771	45	76	82	64	63	78	1	1	1	1	1	1
chr1	25348771	25350999	163	170	224	265	241	284	1	1	1	1	1	1
chr1	25354656	25356463	72	116	118	159	187	177	0	1	1	1	1	1
chr1	25356463	25358463	163	161	239	254	257	309	1	1	1	1	1	1
chr1	25358463	25360463	576	774	696	833	798	771	1	1	1	1	1	1
chr1	25360463	25362257	239	353	337	363	400	305	1	1	1	1	1	1
chr1	25557590	25560608	1842	1952	1694	1885	1886	1823	1	1	1	1	1	1
chr1	25562055	25564659	235	238	270	258	256	342	1	1	1	1	1	1
chr1	25565343	25567972	454	582	505	449	458	465	1	1	1	1	1	1
chr1	25570423	25572773	323	406	292	349	404	382	0	1	1	1	1	1
chr1	25572773	25575299	2107	2834	2024	2525	2714	2158	1	1	1	1	1	1
chr1	25592393	25594249	283	310	239	479	422	433	1	1	1	1	1	1
chr1	25594249	25595383	100	144	110	243	264	190	1	1	1	1	1	1
chr1	25662679	25664219	513	600	389	498	426	466	1	1	1	1	1	1
chr1	25664219	25666219	1482	1537	1240	1514	1392	1347	1	1	1	1	1	1
chr1	25666219	25667557	96	85	66	61	62	75	1	1	1	0	1	1
chr1	25755596	25757969	1456	1708	1216	1883	1851	1488	1	1	1	1	1	1
chr1	25757969	25759969	408	441	312	522	656	504	1	1	1	1	1	1
chr1	25759969	25761969	43	34	24	38	33	52	0	0	0	0	0	0
chr1	25761969	25763281	93	55	57	60	73	104	1	0	0	0	1	1
chr1	25869548	25871364	817	1222	863	1054	1283	930	1	1	1	1	1	1
chr1	25871364	25873022	48	91	74	75	128	107	0	1	1	0	1	0
chr1	25874523	25875823	103	122	188	116	133	152	1	1	1	1	1	1
chr1	25875823	25877823	381	381	558	420	439	540	1	1	1	1	1	1
chr1	25877823	25879111	49	38	72	39	45	65	1	0	1	1	1	1
chr1	25942085	25945024	485	891	656	468	748	552	1	1	1	1	1	1
chr1	26125891	26127692	96	253	132	64	145	91	1	1	1	1	1	1
chr1	26145284	26148801	1790	2440	1787	1894	2024	1751	1	1	1	1	1	1
chr1	26184329	26186737	1262	1448	1159	1389	1394	1346	1	1	1	1	1	1
chr1	26186737	26188396	145	154	159	71	82	78	1	1	1	0	0	0
chr1	26199016	26200900	95	94	104	44	44	59	1	1	1	0	0	0
chr1	26200900	26203128	835	1170	825	573	749	553	1	1	1	1	1	1
chr1	26228853	26230807	37	32	40	24	24	27	0	0	0	0	0	0
chr1	26230807	26232807	1858	2055	1741	1985	1706	1923	1	1	1	1	1	1
chr1	26232807	26233911	166	193	149	180	263	231	1	1	1	1	1	1
chr1	26248576	26250384	146	342	197	50	100	85	1	1	1	1	1	1
chr1	26297336	26298955	29	53	63	30	21	49	0	0	0	0	0	0
chr1	26322849	26325570	865	995	815	891	969	925	1	1	1	1	1	1
chr1	26361116	26363098	454	675	513	395	565	427	1	1	1	1	1	1
chr1	26436429	26437541	313	431	315	301	328	325	1	1	1	1	1	1
chr1	26437541	26439541	1839	2200	1673	1786	1959	1630	1	1	1	1	1	1
chr1	26439541	26441466	113	119	116	69	88	85	1	1	1	0	1	1
chr1	26445787	26447359	72	83	103	13	21	43	1	1	1	0	0	0
chr1	26452354	26454522	67	63	84	8	14	32	0	0	0	0	0	0
chr1	26487752	26489171	44	101	62	5	18	20	1	1	1	0	0	0
chr1	26490255	26491458	43	81	55	14	28	21	0	1	1	0	0	0
chr1	26495800	26497915	849	1176	869	1013	1054	989	1	1	1	1	1	1
chr1	26503466	26504913	168	182	174	18	16	9	1	1	1	0	0	0
chr1	26551411	26552668	19	31	12	2	14	14	0	1	0	0	0	0
chr1	26559753	26562126	1338	1588	1255	1543	1414	1318	1	1	1	1	1	1
chr1	26562126	26564126	92	78	94	73	73	107	1	0	1	0	0	1
chr1	26564126	26565594	36	16	33	31	22	50	0	0	0	0	0	0
chr1	26604972	26608365	1028	1316	1024	1145	1233	1031	1	1	1	1	1	1
chr1	26614991	26617334	81	77	124	75	82	111	0	0	1	0	0	0
chr1	26631746	26634877	814	977	870	817	739	753	1	1	1	1	1	1
chr1	26640398	26641691	21	19	30	20	20	17	0	0	0	0	0	0
chr1	26641691	26643691	232	268	341	278	224	333	1	1	1	1	1	1
chr1	26643691	26645691	1458	1788	1485	1801	1815	1591	1	1	1	1	1	1
chr1	26645691	26648667	516	638	481	589	491	533	0	1	1	1	1	1
chr1	26661965	26663810	153	339	220	184	305	240	1	1	1	1	1	1
chr1	26686554	26687260	17	22	17	4	11	10	0	1	0	0	0	0
chr1	26757325	26760550	1216	1449	1164	1127	1281	1208	1	1	1	1	1	1
chr1	26797073	26798190	51	72	52	71	77	60	1	1	0	1	1	1
chr1	26798190	26800190	1622	2073	1584	2015	1929	1782	1	1	1	1	1	1
chr1	26800190	26802014	238	264	298	290	314	403	1	1	1	1	1	1
chr1	26825959	26829000	1400	1806	1430	1503	1623	1382	1	1	1	1	1	1
chr1	26855420	26857408	626	754	628	681	843	708	1	1	1	1	1	1
chr1	26857408	26858495	25	35	20	21	50	45	1	0	0	0	1	1
chr1	26866422	26867527	5	8	6	15	15	17	0	0	0	0	0	0
chr1	26867527	26869527	247	353	338	239	272	268	1	1	1	1	1	1
chr1	26869527	26871527	332	463	430	345	430	355	1	1	1	1	1	1
chr1	26871527	26874508	1198	1689	1195	1309	1461	1095	1	1	1	1	1	1
chr1	26908058	26909714	57	39	82	61	75	106	0	0	0	0	0	1
chr1	26944605	26945744	36	27	48	13	3	24	1	1	1	0	0	0
chr1	26945744	26947744	722	850	762	816	902	788	1	1	1	1	1	1
chr1	26947744	26949192	548	619	663	427	497	493	1	1	1	1	1	1
chr1	26953957	26955581	73	53	90	22	18	40	0	0	1	0	0	0
chr1	26959024	26960960	96	93	114	70	61	73	0	0	1	1	1	1
chr1	27018051	27019685	516	558	479	526	428	433	1	1	1	1	1	1
chr1	27019685	27021685	655	726	697	617	618	677	1	1	1	1	1	1
chr1	27021685	27023685	1840	2223	1597	2234	2256	1871	1	1	1	1	1	1
chr1	27023685	27025685	1701	1854	1460	1743	1807	1549	1	1	1	1	1	1
chr1	27025685	27027685	429	414	370	244	249	356	1	1	1	1	1	1
chr1	27027685	27029685	275	239	269	176	192	307	1	1	1	1	1	1
chr1	27029685	27031685	56	34	43	31	21	39	0	0	0	0	0	0
chr1	27031685	27033784	63	33	47	24	18	51	0	0	0	0	0	0
chr1	27048854	27051993	268	276	428	174	161	278	1	1	1	1	1	1
chr1	27069070	27072344	416	414	593	448	414	585	1	1	1	1	1	1
chr1	27112158	27113873	209	254	320	195	200	204	1	1	1	1	1	1
chr1	27113873	27115873	1939	2405	2000	1979	2156	1881	1	1	1	1	1	1
chr1	27115873	27117753	88	60	62	40	27	43	1	0	1	0	0	0
chr1	27146768	27148506	60	75	86	47	45	71	0	0	1	0	0	1
chr1	27152121	27154421	1094	1237	890	1206	1375	1121	1	1	1	1	1	1
chr1	27154421	27156421	328	357	303	454	452	382	1	1	1	1	1	1
chr1	27156421	27158541	20	21	20	22	25	17	0	0	0	0	0	0
chr1	27159092	27161051	114	88	146	95	111	111	1	1	1	1	1	1
chr1	27189809	27191084	196	230	218	254	232	248	1	1	1	1	1	1
chr1	27191084	27193678	1111	1502	1248	1428	1480	1351	1	1	1	1	1	1
chr1	27215091	27217759	1286	1651	1263	1337	1534	1219	1	1	1	1	1	1
chr1	27225359	27228259	1450	1756	1423	1606	1525	1609	1	1	1	1	1	1
chr1	27247273	27249685	1193	1396	1189	1194	1305	1247	1	1	1	1	1	1
chr1	27249685	27250977	27	21	14	12	18	21	0	0	0	0	0	0
chr1	27285882	27287365	65	132	100	56	89	45	1	1	1	1	1	1
chr1	27319185	27321539	180	302	213	198	311	276	1	1	1	1	1	1
chr1	27338782	27340215	48	69	49	19	32	32	1	1	1	0	0	0
chr1	27370919	27372743	160	139	158	10	19	24	1	1	1	0	0	0
chr1	27393624	27395072	52	77	68	1	2	0	0	1	1	0	0	0
chr1	27462893	27464249	71	73	89	64	76	62	0	0	1	1	1	0
chr1	27478196	27480356	192	207	153	172	195	154	1	1	1	1	1	1
chr1	27480356	27482667	593	786	590	609	780	639	1	1	1	1	1	1
chr1	27560092	27562552	1067	1287	961	1105	1195	960	1	1	1	1	1	1
chr1	27562552	27563556	112	115	132	85	106	109	1	1	1	1	1	1
chr1	27578452	27581126	270	245	298	147	151	208	1	1	1	1	1	1
chr1	27581126	27582203	46	36	50	19	10	28	1	1	1	0	0	0
chr1	27647771	27650903	1246	1556	1292	1378	1444	1284	1	1	1	1	1	1
chr1	27666349	27667698	47	55	63	42	50	55	1	1	1	1	1	1
chr1	27667698	27669698	710	1057	732	627	949	601	1	1	1	1	1	1
chr1	27669698	27671036	302	343	309	187	280	250	1	1	1	1	1	1
chr1	27675478	27676758	0	0	0	9	11	9	0	0	0	0	0	0
chr1	27682608	27684525	130	224	185	42	43	23	1	1	1	0	0	0
chr1	27686210	27687783	135	191	187	49	66	76	1	1	1	1	1	1
chr1	27691410	27694071	393	665	474	437	659	496	1	1	1	1	1	1
chr1	27718058	27720011	297	394	317	222	284	248	1	1	1	1	1	1
chr1	27744075	27746838	246	225	268	205	207	233	1	1	1	1	1	1
chr1	27754453	27756540	211	213	258	192	218	250	1	1	1	1	1	1
chr1	27756540	27758529	113	90	133	114	103	140	1	0	1	1	1	1
chr1	27761384	27763889	187	157	245	197	192	269	1	1	1	1	1	1
chr1	27763889	27766145	88	76	92	115	85	144	1	0	1	1	1	1
chr1	27768123	27770488	126	142	185	149	135	211	0	1	1	1	1	1
chr1	27770715	27773241	217	127	168	160	127	216	1	0	1	1	1	1
chr1	27790349	27792678	214	180	193	27	21	35	1	1	1	0	0	0
chr1	27799017	27801288	116	89	166	62	52	89	1	0	1	0	0	1
chr1	27801288	27803288	59	52	55	65	61	133	0	0	1	1	1	1
chr1	27803288	27805288	97	114	150	172	167	223	1	1	1	1	1	1
chr1	27805288	27807288	79	79	139	98	104	129	0	0	1	0	0	1
chr1	27807288	27809288	230	187	171	252	220	292	1	1	1	1	1	1
chr1	27809288	27810981	97	77	87	94	104	119	1	1	1	1	1	1
chr1	27813345	27815388	531	427	398	401	335	412	1	1	1	1	1	1
chr1	27815388	27817388	1388	1756	1352	1577	1524	1367	1	1	1	1	1	1
chr1	27817388	27819750	117	127	130	142	159	159	1	0	1	1	1	1
chr1	27825818	27827497	27	29	38	88	101	91	0	0	0	1	1	1
chr1	27851281	27853454	279	358	478	88	150	159	1	1	1	1	1	1
chr1	27853454	27855520	145	294	209	103	226	121	1	1	1	1	1	1
chr1	27894225	27896033	105	156	99	97	132	97	1	1	1	1	1	1
chr1	27901633	27903332	105	218	141	85	154	135	1	1	1	1	1	1
chr1	27927821	27929500	169	251	167	249	339	243	1	1	1	1	1	1
chr1	27929500	27931508	888	925	747	929	944	813	1	1	1	1	1	1
chr1	27949475	27951217	88	103	99	36	53	68	0	1	1	0	0	0
chr1	27951217	27954065	1161	1427	1304	480	496	662	1	1	1	1	1	1
chr1	27956166	27957654	52	50	70	25	19	24	1	1	1	0	0	0
chr1	27957654	27959654	145	168	171	107	89	155	1	1	1	1	0	1
chr1	27959654	27962479	412	787	606	212	303	290	1	1	1	1	1	1
chr1	27984377	27985875	106	143	150	172	188	182	1	1	1	1	1	1
chr1	27985875	27987838	494	616	586	650	646	624	1	1	1	1	1	1
chr1	27988661	27989846	55	46	81	33	31	40	0	0	1	0	0	0
chr1	27995415	27997521	139	147	107	161	169	154	1	1	1	1	1	1
chr1	27997521	27999714	734	702	645	774	805	690	1	1	1	1	1	1
chr1	28015404	28017582	59	52	53	125	111	140	0	0	0	1	1	1
chr1	28051329	28054266	1073	1295	1028	1206	1279	1151	1	1	1	1	1	1
chr1	28098147	28100986	1655	1979	1591	1572	1511	1516	1	1	1	1	1	1
chr1	28100986	28102986	140	127	113	105	86	140	1	0	0	0	0	0
chr1	28102986	28104016	31	28	16	31	12	21	0	0	0	0	0	0
chr1	28155983	28158539	1801	2170	1667	2038	2106	1921	1	1	1	1	1	1
chr1	28158539	28160703	101	62	93	72	60	93	0	0	0	0	0	0
chr1	28194964	28196750	73	105	108	81	96	114	0	1	1	0	0	0
chr1	28198394	28200281	791	1177	790	1080	1290	988	1	1	1	1	1	1
chr1	28200281	28202281	135	140	97	191	291	247	1	1	1	1	1	1
chr1	28202281	28203731	19	23	15	37	39	37	0	0	0	0	0	1
chr1	28209318	28212157	23	20	14	53	89	93	0	0	0	0	0	0
chr1	28215497	28216514	13	8	17	31	32	34	0	0	0	1	1	1
chr1	28216514	28219432	158	148	239	303	279	385	1	0	1	1	1	1
chr1	28238888	28242165	1115	1426	1078	1333	1457	1280	1	1	1	1	1	1
chr1	28261085	28262285	32	61	39	20	28	25	0	1	1	0	0	0
chr1	28285283	28287600	482	880	579	537	688	551	1	1	1	1	1	1
chr1	28384132	28386533	70	91	87	191	217	225	0	0	1	1	1	1
chr1	28386533	28388533	8	6	3	117	151	124	0	0	0	1	1	1
chr1	28388533	28389589	4	2	5	52	53	36	0	0	0	1	1	1
chr1	28389875	28391698	59	53	71	145	159	149	0	0	1	1	1	1
chr1	28391698	28393698	23	26	36	204	210	215	0	0	0	1	1	1
chr1	28393698	28394918	19	15	11	39	41	64	0	0	0	1	1	1
chr1	28395668	28397748	70	62	72	149	133	181	0	0	0	1	1	1
chr1	28397982	28400268	69	41	67	83	77	129	0	0	0	0	0	1
chr1	28400764	28401902	25	10	21	30	36	56	0	0	0	1	0	1
chr1	28401902	28403855	51	52	65	112	76	119	0	0	0	1	0	1
chr1	28406599	28407686	0	3	4	46	42	55	0	0	0	1	1	1
chr1	28407686	28409686	28	23	32	170	157	176	0	0	0	1	1	1
chr1	28409686	28411686	28	23	24	364	417	354	0	0	0	1	1	1
chr1	28411686	28413686	126	146	124	607	594	620	1	1	1	1	1	1
chr1	28413686	28415686	1616	1774	1548	1985	1933	1763	1	1	1	1	1	1
chr1	28415686	28416895	52	94	68	183	226	202	1	0	1	1	1	1
chr1	28453409	28455305	73	71	101	81	35	101	0	0	1	0	0	1
chr1	28458495	28460361	59	56	111	45	40	72	0	0	1	0	0	1
chr1	28460798	28462870	53	50	117	85	83	146	0	0	1	0	0	1
chr1	28470045	28471443	64	62	84	61	66	84	0	0	1	0	1	1
chr1	28471443	28473443	68	86	138	87	94	101	0	0	1	0	1	1
chr1	28473443	28475909	237	276	351	191	222	205	1	1	1	1	1	1
chr1	28494881	28497001	73	68	133	115	98	136	0	0	1	0	0	1
chr1	28497696	28499900	71	91	142	142	147	160	0	1	1	1	1	1
chr1	28499900	28501900	127	211	265	292	379	312	1	1	1	1	1	1
chr1	28501900	28504356	287	457	609	537	678	601	1	1	1	1	1	1
chr1	28524876	28525924	64	64	131	69	76	124	1	0	1	1	1	1
chr1	28525924	28527820	103	89	125	123	115	161	1	0	1	1	1	1
chr1	28557727	28560277	995	1323	921	1151	1264	1138	1	1	1	1	1	1
chr1	28561144	28563831	1540	2017	1504	1865	1882	1682	1	1	1	1	1	1
chr1	28563831	28565259	169	141	133	100	102	142	1	1	1	1	1	1
chr1	28570157	28572465	376	350	412	319	376	414	1	1	1	1	1	1
chr1	28572465	28574465	1141	1102	1024	1056	951	1042	1	1	1	1	1	1
chr1	28574465	28576413	103	105	114	93	96	87	1	0	1	1	1	1
chr1	28584960	28587246	1107	1394	933	1236	1496	1166	1	1	1	1	1	1
chr1	28587246	28588575	118	116	77	120	167	124	1	1	1	1	1	1
chr1	28653510	28654781	41	54	77	48	60	79	0	0	1	0	1	1
chr1	28654781	28657542	1911	2200	1835	2155	2048	2007	1	1	1	1	1	1
chr1	28695319	28697349	1429	1755	1326	1414	1436	1175	1	1	1	1	1	1
chr1	28697349	28698407	105	113	111	77	81	90	1	1	1	1	1	1
chr1	28743248	28745112	186	220	304	86	96	151	1	1	1	1	1	1
chr1	28763843	28766900	758	614	564	197	206	313	1	1	1	1	1	1
chr1	28830656	28833056	1819	2114	1622	2204	2076	1921	1	1	1	1	1	1
chr1	28833056	28835056	3056	2976	2563	3459	2924	3083	1	1	1	1	1	1
chr1	28835056	28837056	1617	1431	1294	1477	1299	1568	1	1	1	1	1	1
chr1	28837056	28839794	108	77	103	119	87	98	0	0	0	1	0	0
chr1	28843944	28845931	1148	1331	1022	1226	1147	1111	1	1	1	1	1	1
chr1	28845931	28847538	144	164	159	107	95	129	1	1	1	1	0	1
chr1	28878233	28881342	1181	1485	1185	1409	1496	1286	1	1	1	1	1	1
chr1	28904476	28907134	757	777	714	1015	860	971	1	1	1	1	1	1
chr1	28907134	28909134	2293	2724	2158	2564	2419	2374	1	1	1	1	1	1
chr1	28909134	28910405	251	364	252	303	332	303	1	1	1	1	1	1
chr1	28912687	28913957	50	49	39	37	30	61	0	0	0	0	0	1
chr1	28918145	28919966	166	356	262	114	168	147	1	1	1	1	1	1
chr1	28967095	28968373	68	69	64	57	78	80	1	1	1	1	1	1
chr1	28968373	28970373	1955	2236	1815	2257	2105	2064	1	1	1	1	1	1
chr1	28970373	28971674	243	291	265	287	286	294	1	1	1	1	1	1
chr1	28973649	28976446	202	256	249	303	312	301	1	1	1	1	1	1
chr1	28993909	28997372	2006	2301	1978	2156	2201	2045	1	1	1	1	1	1
chr1	29062032	29063091	186	252	198	229	257	221	1	1	1	1	1	1
chr1	29063091	29065091	1596	1885	1427	1834	1819	1595	1	1	1	1	1	1
chr1	29065091	29067319	63	42	62	48	63	79	0	0	0	0	0	0
chr1	29070279	29072442	30	23	30	21	18	17	0	0	0	0	0	0
chr1	29072442	29074442	18	11	13	17	11	7	0	0	0	0	0	0
chr1	29074442	29076442	21	26	10	19	16	13	0	0	0	0	0	0
chr1	29076442	29077524	8	2	4	8	4	3	0	0	0	0	0	0
chr1	29101047	29102547	116	182	127	3	16	21	1	1	1	0	0	0
chr1	29111376	29112674	183	255	184	133	159	123	1	1	1	1	1	1
chr1	29212783	29215211	864	1174	850	936	1295	980	1	1	1	1	1	1
chr1	29239881	29242589	475	623	500	538	627	533	1	1	1	1	1	1
chr1	29252847	29255476	124	96	125	131	121	181	1	0	1	0	1	1
chr1	29447862	29449268	21	65	47	32	56	24	0	1	1	0	0	0
chr1	29449820	29452069	212	359	263	178	313	201	1	1	1	1	1	1
chr1	29460272	29461548	27	80	47	8	14	13	0	1	1	0	0	0
chr1	29503230	29505199	21	15	16	7	5	13	0	0	0	0	0	0
chr1	29505199	29507199	621	554	492	480	381	554	1	1	1	1	1	1
chr1	29507199	29509851	2169	2579	2163	2601	2387	2237	1	1	1	1	1	1
chr1	29555864	29558270	830	1033	828	860	881	928	1	1	1	1	1	1
chr1	29562558	29564587	77	142	106	76	132	87	1	1	1	1	1	1
chr1	29585943	29586932	8	28	15	17	26	27	0	1	0	0	1	1
chr1	29609564	29610714	1	8	3	23	15	19	0	0	0	0	0	0
chr1	30164208	30165442	44	21	51	24	19	39	0	0	1	0	0	0
chr1	31072932	31074122	10	5	2	5	6	6	0	0	0	0	0	0
chr1	31190091	31193349	698	931	706	723	865	698	1	1	1	1	1	1
chr1	31215196	31217410	212	199	258	225	205	248	1	1	1	1	1	1
chr1	31217410	31219410	222	281	306	488	655	565	1	1	1	1	1	1
chr1	31219410	31221410	171	196	162	505	676	590	1	1	1	1	1	1
chr1	31221410	31223410	137	207	204	467	615	529	1	1	1	1	1	1
chr1	31223410	31225410	211	345	342	499	668	578	1	1	1	1	1	1
chr1	31225410	31227410	800	835	845	1654	1560	1587	1	1	1	1	1	1
chr1	31227410	31229410	1396	1733	1309	2048	2052	1985	1	1	1	1	1	1
chr1	31229410	31231410	1634	2189	1601	2321	2408	2030	1	1	1	1	1	1
chr1	31231410	31233410	142	121	162	375	367	431	1	1	1	1	1	1
chr1	31233410	31235410	89	97	108	283	381	425	1	1	1	1	1	1
chr1	31235410	31237410	27	28	19	106	136	119	0	0	0	1	1	1
chr1	31237410	31240225	27	26	23	224	196	246	0	0	0	1	1	1
chr1	31251746	31253393	13	18	16	68	93	77	0	0	0	0	1	0
chr1	31296641	31297720	35	50	28	42	53	53	0	0	0	0	1	1
chr1	31380543	31382357	26	40	33	43	69	56	0	0	0	0	1	0
chr1	31499839	31502250	92	69	137	49	35	88	1	0	1	0	0	1
chr1	31528176	31530236	9	5	10	7	3	3	0	0	0	0	0	0
chr1	31533597	31535088	16	9	22	10	15	10	0	0	0	0	0	0
chr1	31535088	31537088	635	548	468	515	442	584	1	1	1	1	1	1
chr1	31537088	31539651	1762	1880	1530	1884	1692	1670	1	1	1	1	1	1
chr1	31627068	31629349	519	636	556	601	648	596	1	1	1	1	1	1
chr1	31635174	31636027	15	17	17	22	28	25	0	0	0	1	1	1
chr1	31711812	31713052	36	59	24	12	28	25	1	1	0	0	0	0
chr1	31767464	31770340	1833	2106	1677	1974	1960	1839	1	1	1	1	1	1
chr1	31770340	31771562	343	384	353	408	427	424	1	1	1	1	1	1
chr1	31845070	31847228	63	196	145	45	77	100	0	1	1	0	1	1
chr1	31866950	31868524	104	142	108	69	116	103	1	1	1	1	1	1
chr1	31885370	31887230	135	237	174	195	298	292	1	1	1	1	1	1
chr1	31895452	31897820	64	62	66	119	136	208	0	0	0	1	1	1
chr1	31971622	31973108	19	17	15	17	31	119	0	0	0	0	0	1
chr1	31973108	31975994	10	12	3	27	32	114	0	0	0	0	0	1
chr1	32014331	32016490	147	196	160	174	169	192	1	1	1	1	1	1
chr1	32082999	32084268	69	80	78	28	76	56	1	1	1	0	1	1
chr1	32108761	32111932	1946	2312	1738	2026	2230	1935	1	1	1	1	1	1
chr1	32167629	32168636	1	0	0	2	0	0	0	0	0	0	0	0
chr1	32168636	32171287	35	54	31	21	41	35	0	0	0	0	0	0
chr1	32171997	32173769	40	39	59	20	15	31	0	0	1	0	0	0
chr1	32179850	32181423	34	95	71	38	59	41	0	1	1	0	1	1
chr1	32225906	32227437	89	111	72	30	60	37	1	1	1	0	1	0
chr1	32228163	32230607	107	252	160	65	146	106	1	1	1	0	1	1
chr1	32237442	32238809	28	72	47	13	45	25	0	1	1	0	0	0
chr1	32253129	32255411	776	1006	783	778	779	770	1	1	1	1	1	1
chr1	32267944	32268925	36	29	36	3	8	3	1	0	1	0	0	0
chr1	32345818	32347729	89	85	146	69	46	94	0	0	1	0	0	1
chr1	32375860	32377321	26	30	22	45	26	46	0	0	0	0	0	1
chr1	32377321	32379795	88	81	74	111	70	113	0	0	0	1	0	1
chr1	32390022	32392513	168	157	179	354	351	316	1	1	1	1	1	1
chr1	32392513	32394513	146	121	183	196	177	234	1	1	1	1	1	1
chr1	32394513	32396513	401	408	340	321	322	382	1	1	1	1	1	1
chr1	32396513	32398513	281	260	218	220	148	264	1	1	1	1	1	1
chr1	32398513	32400513	285	294	240	317	330	329	1	1	1	1	1	1
chr1	32400513	32402513	866	809	698	1030	849	1038	1	1	1	1	1	1
chr1	32402513	32404513	1651	1721	1351	1967	1693	1600	1	1	1	1	1	1
chr1	32404513	32406367	77	75	81	62	85	73	1	1	1	1	1	1
chr1	32407225	32409394	142	122	128	141	122	166	1	1	1	1	1	1
chr1	32409394	32411937	852	1101	919	776	818	789	1	1	1	1	1	1
chr1	32420946	32423080	91	86	119	98	66	107	1	0	1	0	0	1
chr1	32423080	32424545	70	80	74	64	32	83	1	1	1	0	0	1
chr1	32445966	32447443	34	22	31	53	50	66	0	0	0	0	0	1
chr1	32450326	32451725	39	46	51	64	73	88	0	0	0	1	1	1
chr1	32478110	32480709	2004	2728	2004	2394	2433	2108	1	1	1	1	1	1
chr1	32480709	32482709	668	701	579	757	626	745	1	1	1	1	1	1
chr1	32482709	32484709	20	21	14	17	13	16	0	0	0	0	0	0
chr1	32484709	32486709	45	32	35	16	17	15	0	0	0	0	0	0
chr1	32486709	32487856	46	34	59	40	29	55	0	0	0	0	0	1
chr1	32537283	32540167	1060	1162	911	1079	1067	997	1	1	1	1	1	1
chr1	32572483	32574836	1503	2017	1387	1689	1764	1558	1	1	1	1	1	1
chr1	32574836	32577773	243	297	279	216	208	236	1	1	1	0	0	0
chr1	32587102	32588581	36	41	71	11	14	23	0	0	1	0	0	0
chr1	32644303	32646886	1548	2020	1611	1959	2080	1698	1	1	1	1	1	1
chr1	32646886	32648886	87	125	69	114	185	162	0	1	1	1	1	1
chr1	32648886	32650886	10	9	10	22	17	20	0	0	0	0	0	0
chr1	32650886	32652523	5	5	4	2	8	11	0	0	0	0	0	0
chr1	32664960	32667370	1111	1312	1050	1068	1090	904	1	1	1	1	1	1
chr1	32667370	32669451	443	486	353	638	647	531	1	1	1	1	1	1
chr1	32670460	32672590	566	863	604	605	687	634	1	1	1	1	1	1
chr1	32685795	32687174	43	39	37	35	44	40	0	0	0	0	0	0
chr1	32687174	32689830	1769	2033	1549	1968	1886	1710	1	1	1	1	1	1
chr1	32705417	32708114	345	720	478	274	483	334	1	1	1	1	1	1
chr1	32713569	32716274	224	282	348	227	232	254	1	1	1	1	1	1
chr1	32716274	32718274	1206	1701	1386	1300	1290	1272	1	1	1	1	1	1
chr1	32718274	32720274	543	708	697	635	711	644	1	1	1	1	1	1
chr1	32720274	32722274	378	399	465	358	408	436	1	1	1	1	1	1
chr1	32722274	32723484	113	101	117	70	69	132	1	1	1	1	1	1
chr1	32728950	32731474	99	110	152	97	101	131	0	1	1	1	1	1
chr1	32756326	32758902	1523	1765	1415	1753	1741	1502	1	1	1	1	1	1
chr1	32758902	32760902	74	124	98	95	96	114	0	0	0	0	0	1
chr1	32760902	32762592	23	10	27	35	17	32	0	0	0	0	0	0
chr1	32773167	32774841	84	94	87	66	84	79	0	1	1	0	1	0
chr1	32780483	32783011	101	151	161	367	362	398	1	1	1	1	1	1
chr1	32783011	32785011	50	42	71	70	69	96	0	0	0	0	1	1
chr1	32785011	32787011	87	65	120	111	82	126	0	0	1	1	0	1
chr1	32787011	32789031	82	99	133	111	133	146	0	0	1	0	0	1
chr1	32798264	32800541	502	649	449	428	597	410	1	1	1	1	1	1
chr1	32800541	32802541	1258	1592	992	1385	1501	1178	1	1	1	1	1	1
chr1	32802541	32804454	83	107	81	87	118	115	1	1	1	1	1	1
chr1	32816095	32818480	566	835	631	667	761	600	1	1	1	1	1	1
chr1	32825278	32826200	23	15	35	6	6	8	0	0	1	0	0	0
chr1	32826827	32828437	83	173	91	34	53	51	1	1	1	0	1	1
chr1	32858699	32861491	1086	1305	1096	1073	1240	1066	1	1	1	1	1	1
chr1	32929971	32931426	43	82	57	16	35	31	0	1	1	0	0	0
chr1	32965130	32967333	430	644	410	509	624	461	1	1	1	1	1	1
chr1	32985264	32987505	220	262	250	266	255	246	1	1	1	1	1	1
chr1	33004211	33007101	569	827	651	869	879	678	1	1	1	1	1	1
chr1	33077041	33078824	137	267	191	295	337	287	1	1	1	1	1	1
chr1	33084624	33086573	95	71	98	102	72	124	0	0	0	0	0	1
chr1	33088076	33090613	86	64	115	106	69	131	0	0	1	0	0	1
chr1	33092262	33094797	113	69	84	108	87	125	1	0	0	1	0	1
chr1	33112002	33114843	580	683	591	655	587	611	1	1	1	1	1	1
chr1	33114843	33116843	1980	2102	1849	2184	1949	1902	1	1	1	1	1	1
chr1	33116843	33118843	1305	1618	1308	1506	1619	1468	1	1	1	1	1	1
chr1	33118843	33120843	30	39	32	46	47	36	0	0	0	0	0	0
chr1	33120843	33121904	8	3	9	8	4	4	0	0	0	0	0	0
chr1	33167700	33169436	66	140	88	47	116	69	1	1	1	1	1	1
chr1	33177559	33178706	44	78	45	28	40	33	0	1	0	0	0	0
chr1	33206643	33208245	89	151	107	106	136	116	1	1	1	1	1	1
chr1	33218630	33220372	124	251	159	138	205	148	1	1	1	1	1	1
chr1	33277880	33280569	21	26	19	21	16	25	0	0	0	0	0	0
chr1	33280569	33282569	1002	1128	932	1275	1172	1215	1	1	1	1	1	1
chr1	33282569	33284569	2324	2775	2151	2649	2549	2379	1	1	1	1	1	1
chr1	33284569	33286656	447	378	417	443	384	476	1	1	1	1	1	1
chr1	33287320	33288787	55	72	80	44	48	64	0	0	0	0	0	0
chr1	33335764	33337213	31	85	59	23	64	42	0	1	1	0	1	1
chr1	33358602	33359469	11	19	20	12	15	22	0	0	0	0	0	0
chr1	33366262	33367817	140	252	172	50	116	81	1	1	1	1	1	1
chr1	33425739	33428647	362	392	397	464	466	519	1	1	1	1	1	1
chr1	33428647	33431615	954	1419	982	1143	1361	1145	1	1	1	1	1	1
chr1	33438202	33439431	31	89	43	30	48	32	1	1	1	0	1	1
chr1	33445473	33447945	201	201	268	191	202	274	1	1	1	1	1	1
chr1	33456706	33459554	138	132	160	132	110	170	0	0	1	0	0	1
chr1	33489840	33491725	51	45	88	50	36	67	0	0	1	0	0	0
chr1	33496089	33497233	6	4	8	6	3	4	0	0	0	0	0	0
chr1	33497233	33499233	49	40	59	18	19	20	0	0	1	0	0	0
chr1	33499233	33501233	135	123	145	84	89	115	1	1	1	0	1	1
chr1	33501233	33503439	1290	1506	1191	1425	1435	1379	1	1	1	1	1	1
chr1	33523478	33524719	35	43	61	10	18	21	0	0	1	0	0	0
chr1	33545719	33547824	293	425	320	310	381	363	1	1	1	1	1	1
chr1	33585021	33587138	5	3	2	140	143	174	0	0	0	1	1	1
chr1	33590973	33593594	1431	1446	1329	1636	1489	1611	1	1	1	1	1	1
chr1	33593594	33594881	305	322	387	348	346	399	1	1	1	1	1	1
chr1	33645738	33648335	499	650	496	464	621	471	1	1	1	1	1	1
chr1	33720811	33724471	1026	1455	989	531	701	501	1	1	1	1	1	1
chr1	33809831	33812199	85	54	74	49	38	60	0	0	0	0	0	0
chr1	33812199	33814199	147	156	127	85	113	139	1	1	1	1	1	0
chr1	33814199	33817010	1653	1986	1457	1638	1725	1386	1	1	1	1	1	1
chr1	33895497	33897407	355	530	321	264	321	252	1	1	1	1	1	1
chr1	33925655	33927391	99	114	163	97	73	163	0	1	1	1	0	1
chr1	33927391	33928785	31	43	65	19	19	32	0	0	1	0	0	0
chr1	33937214	33939505	626	729	622	752	722	684	1	1	1	1	1	1
chr1	34368668	34369951	12	11	9	12	19	39	0	0	0	0	0	1
chr1	34628516	34630013	27	41	26	74	125	63	0	1	0	1	1	1
chr1	34994909	34997109	87	94	117	111	102	172	1	1	1	1	0	1
chr1	34997109	34998781	59	31	41	58	46	77	1	0	0	1	0	1
chr1	35323324	35326364	1113	1386	1050	1258	1318	1171	1	1	1	1	1	1
chr1	35330886	35332904	294	496	365	350	438	340	1	1	1	1	1	1
chr1	35350687	35352252	42	69	53	39	68	39	1	1	1	1	1	1
chr1	35394219	35396093	169	256	157	51	87	72	1	1	1	1	1	1
chr1	35448053	35450136	170	190	168	118	141	168	1	1	0	0	0	0
chr1	35450136	35452343	1476	1789	1479	1495	1575	1352	1	1	1	1	1	1
chr1	35494740	35495988	174	190	175	161	156	142	1	1	1	1	1	1
chr1	35495988	35498533	1779	1800	1620	1872	1730	1664	1	1	1	1	1	1
chr1	35544086	35546293	388	574	502	383	428	429	1	1	1	1	1	1
chr1	35585473	35587261	145	218	185	135	204	136	1	1	1	1	1	1
chr1	35650062	35653015	24	20	14	24	18	19	0	0	0	0	0	0
chr1	35653015	35655015	32	25	31	28	36	34	0	0	0	0	0	0
chr1	35655015	35657015	821	823	670	656	552	799	1	1	1	1	1	1
chr1	35657015	35659974	2240	2697	2100	2672	2692	2484	1	1	1	1	1	1
chr1	35733283	35735522	1229	1345	1030	1530	1444	1311	1	1	1	1	1	1
chr1	35735522	35736541	125	142	97	83	90	127	1	1	1	1	1	1
chr1	35829704	35831398	92	79	77	75	59	99	1	0	1	1	0	1
chr1	35971110	35972112	20	12	15	14	3	16	0	0	0	0	0	0
chr1	35972112	35974102	117	114	147	52	63	95	0	0	1	0	0	1
chr1	36001827	36003503	23	11	11	6	7	18	0	0	0	0	0	0
chr1	36003503	36005503	178	172	225	85	74	125	1	1	1	0	0	1
chr1	36005503	36006742	39	21	31	15	12	32	1	0	1	0	0	1
chr1	36021148	36023841	1588	2183	1460	1822	1907	1600	1	1	1	1	1	1
chr1	36023841	36024969	259	369	248	305	370	349	1	1	1	1	1	1
chr1	36038576	36039415	12	39	27	8	15	10	0	1	0	0	0	0
chr1	36041856	36044639	314	642	510	343	512	418	1	1	1	1	1	1
chr1	36102162	36103945	482	419	380	379	404	446	1	1	1	1	1	1
chr1	36103945	36105945	151	138	132	129	131	177	1	1	1	1	1	1
chr1	36105945	36108818	1805	2124	1585	2028	2013	1866	1	1	1	1	1	1
chr1	36172862	36174457	84	177	122	73	126	104	1	1	1	1	1	1
chr1	36180425	36181909	9	16	9	11	11	15	0	0	0	0	0	0
chr1	36182723	36185488	944	1323	922	1050	1090	989	1	1	1	1	1	1
chr1	36228691	36230542	12	4	6	13	7	12	0	0	0	0	0	0
chr1	36233190	36234376	49	53	71	88	97	109	1	0	1	1	1	1
chr1	36234376	36236731	1304	1486	1251	1481	1443	1277	1	1	1	1	1	1
chr1	36262732	36264707	111	64	126	51	38	99	1	0	1	0	0	1
chr1	36272721	36275477	1053	1487	957	1104	1235	938	1	1	1	1	1	1
chr1	36348156	36350416	916	1331	878	1107	1204	964	1	1	1	1	1	1
chr1	36351224	36353574	32	29	37	33	23	31	0	0	0	0	0	0
chr1	36395083	36396084	227	276	249	241	259	273	1	1	1	1	1	1
chr1	36396084	36398084	1670	1997	1551	1905	2040	1642	1	1	1	1	1	1
chr1	36398084	36399414	57	32	36	64	58	66	1	0	0	1	1	1
chr1	36486903	36490419	591	490	540	180	202	265	1	1	1	1	1	1
chr1	36549159	36550620	53	112	74	65	78	63	1	1	1	1	1	1
chr1	36553543	36556549	1342	1685	1244	1307	1337	1219	1	1	1	1	1	1
chr1	36590546	36591435	8	33	10	11	19	11	0	1	0	0	0	0
chr1	36613367	36615940	925	1042	861	953	1034	961	1	1	1	1	1	1
chr1	36615940	36618430	127	146	173	116	161	179	1	1	1	1	1	1
chr1	36620284	36622995	2017	2651	1822	2326	2493	1987	1	1	1	1	1	1
chr1	36622995	36624995	197	267	226	191	211	194	1	1	1	0	0	1
chr1	36624995	36626995	438	591	553	395	419	463	1	1	1	1	1	1
chr1	36626995	36628623	248	295	292	219	201	257	1	1	1	1	1	1
chr1	36688097	36689560	650	686	644	647	637	642	1	1	1	1	1	1
chr1	36689560	36691560	1481	1790	1597	1625	1586	1615	1	1	1	1	1	1
chr1	36691560	36693233	63	61	65	47	65	64	1	0	0	0	0	0
chr1	36771286	36774108	566	904	686	506	660	529	1	1	1	1	1	1
chr1	36785904	36787674	31	76	44	97	153	133	0	1	0	1	1	1
chr1	36788008	36790297	443	681	463	405	552	380	1	1	1	1	1	1
chr1	36838780	36841215	171	214	261	191	208	209	1	1	1	1	1	1
chr1	36848821	36850960	558	680	558	510	639	568	1	1	1	1	1	1
chr1	36850960	36852960	1187	1410	1188	1298	1437	1200	1	1	1	1	1	1
chr1	36852960	36854122	16	13	15	41	55	51	0	0	0	0	1	1
chr1	36855087	36857103	88	68	125	86	75	117	0	0	1	0	0	1
chr1	36860645	36862348	31	20	49	75	78	68	0	0	0	0	1	0
chr1	36862348	36864395	1087	1318	1041	1124	1145	1001	1	1	1	1	1	1
chr1	36866047	36867964	189	232	204	80	85	72	1	1	1	1	1	1
chr1	36915245	36917437	626	869	730	624	734	656	1	1	1	1	1	1
chr1	36928325	36931181	1466	1706	1387	1637	1572	1421	1	1	1	1	1	1
chr1	36951659	36953212	70	70	88	33	40	43	1	1	1	0	0	0
chr1	37754129	37756051	70	63	101	70	56	88	0	0	1	0	0	0
chr1	37758725	37760026	40	20	63	32	28	38	0	0	1	0	0	0
chr1	37938662	37941614	1575	2073	1434	1891	2216	1716	1	1	1	1	1	1
chr1	37941614	37943614	1316	1874	1324	1453	1593	1363	1	1	1	1	1	1
chr1	37943614	37945614	1040	1328	1008	1095	1355	1188	1	1	1	1	1	1
chr1	37945614	37946780	72	85	88	77	100	82	1	1	1	1	1	1
chr1	37978602	37981510	1145	1350	1122	1127	1190	1061	1	1	1	1	1	1
chr1	38018228	38020709	919	1274	949	1079	1193	1053	1	1	1	1	1	1
chr1	38059222	38060333	38	75	61	41	60	79	1	1	1	0	1	1
chr1	38060333	38062375	1107	1168	989	1162	1103	1069	1	1	1	1	1	1
chr1	38141002	38143118	148	145	201	89	89	137	1	1	1	1	0	1
chr1	38154089	38155422	152	186	132	161	151	190	1	1	1	1	1	1
chr1	38155422	38157422	1012	1237	902	1205	1259	1157	1	1	1	1	1	1
chr1	38157422	38159988	1119	1552	1135	1313	1385	1212	1	1	1	1	1	1
chr1	38217795	38219387	88	144	87	108	128	98	1	1	1	1	1	1
chr1	38231073	38232359	38	67	47	41	39	42	0	1	1	1	1	1
chr1	38258671	38261623	425	676	482	555	667	530	1	1	1	1	1	1
chr1	38271685	38275492	1982	2496	1710	2275	2280	1834	1	1	1	1	1	1
chr1	38311623	38313482	168	151	194	97	105	165	1	1	1	1	1	1
chr1	38323322	38326779	1718	2146	1515	1925	1830	1586	1	1	1	1	1	1
chr1	38366186	38368593	153	184	194	86	75	104	1	1	1	0	0	1
chr1	38387572	38389873	113	100	153	50	69	86	1	1	1	0	0	0
chr1	38390197	38392501	321	298	446	246	236	426	1	1	1	1	1	1
chr1	38392501	38393693	60	44	88	54	35	81	1	1	1	1	1	1
chr1	38395224	38396226	127	81	100	77	68	97	1	1	1	1	1	1
chr1	38396226	38398508	954	1162	884	978	1016	901	1	1	1	1	1	1
chr1	38411170	38414058	595	723	572	708	833	666	1	1	1	1	1	1
chr1	38453670	38456797	1402	1714	1261	1374	1373	1249	1	1	1	1	1	1
chr1	38460476	38462606	1	7	2	299	365	286	0	0	0	1	1	1
chr1	38468038	38469897	169	173	116	220	282	217	1	1	1	1	1	1
chr1	38469897	38472055	1192	1379	972	1288	1342	1079	1	1	1	1	1	1
chr1	38476742	38479565	1368	1558	1305	1216	1188	1102	1	1	1	1	1	1
chr1	38479565	38481265	23	30	27	24	19	41	0	0	0	0	0	0
chr1	38495101	38496888	69	79	100	53	80	91	0	0	0	0	0	0
chr1	38508498	38509884	6	8	5	28	32	14	0	0	0	0	0	0
chr1	38509884	38511884	88	113	94	205	303	192	1	1	1	1	1	1
chr1	38511884	38514202	275	405	236	328	468	358	1	1	1	1	1	1
chr1	38618458	38620516	36	47	48	88	102	94	0	0	0	1	1	1
chr1	38638228	38640364	63	52	64	68	47	94	0	0	0	0	0	1
chr1	38939387	38940488	78	70	113	75	72	115	1	1	1	1	1	1
chr1	38940488	38942488	1203	1550	1294	1271	1340	1329	1	1	1	1	1	1
chr1	38942488	38944113	193	255	252	275	300	315	1	1	1	1	1	1
chr1	38964213	38965445	32	24	27	36	36	35	0	0	0	1	1	0
chr1	39024079	39027199	387	433	515	239	266	330	1	1	1	1	1	1
chr1	39043622	39044853	6	9	13	4	5	12	0	0	0	0	0	0
chr1	39269243	39270545	21	35	26	28	46	49	0	1	1	0	1	1
chr1	39279643	39281119	11	3	2	8	8	6	0	0	0	0	0	0
chr1	39281119	39282816	59	101	93	35	46	54	1	1	1	0	0	0
chr1	39283492	39284719	24	40	32	13	15	20	0	0	0	0	0	0
chr1	39322426	39324838	310	383	309	444	492	431	1	0	0	1	1	1
chr1	39324838	39327191	1153	1264	972	1284	1317	1155	1	1	1	1	1	1
chr1	39337173	39340439	1625	1761	1320	1575	1597	1484	1	1	1	1	1	1
chr1	39455687	39458206	1596	1928	1384	1813	1747	1608	1	1	1	1	1	1
chr1	39458206	39459323	150	142	133	148	147	170	1	1	1	1	1	1
chr1	39461734	39462773	4	5	9	2	2	7	0	0	0	0	0	0
chr1	39490899	39493920	1400	1593	1257	1401	1296	1314	1	1	1	1	1	1
chr1	39546327	39547976	101	156	139	40	61	82	1	1	1	1	1	1
chr1	39567722	39570457	84	82	103	102	93	125	0	0	1	0	0	1
chr1	39570457	39572457	648	1112	657	1091	1390	1068	1	1	1	1	1	1
chr1	39572457	39574457	19	19	16	65	88	66	0	0	0	0	0	0
chr1	39574457	39576658	17	5	9	14	7	16	0	0	0	0	0	0
chr1	39657384	39659183	46	33	30	50	36	68	0	0	0	0	0	0
chr1	39660866	39663662	183	131	192	180	124	246	1	1	1	1	1	1
chr1	39669684	39672757	495	537	556	200	189	270	1	1	1	1	1	1
chr1	39679925	39682135	1021	897	922	1130	836	1012	1	1	1	1	1	1
chr1	39682135	39684135	407	373	391	560	486	603	1	1	1	1	1	1
chr1	39684135	39685354	13	9	9	19	10	19	0	0	0	0	0	0
chr1	39726969	39727959	22	25	38	19	23	36	0	0	1	0	0	0
chr1	39733167	39734875	61	73	97	245	294	296	0	1	1	1	1	1
chr1	39734875	39736875	115	119	122	310	344	325	1	1	1	1	1	1
chr1	39736875	39739788	35	32	31	77	97	105	0	0	0	1	1	1
chr1	39873174	39876082	759	1174	785	612	862	629	1	1	1	1	1	1
chr1	39956226	39958342	155	342	206	286	373	276	1	1	1	1	1	1
chr1	39974232	39976353	73	87	106	131	150	148	0	0	1	0	0	1
chr1	39980187	39981940	76	110	73	76	116	59	1	1	1	1	1	1
chr1	40023857	40026135	401	450	401	56	70	104	1	1	1	1	1	1
chr1	40037163	40039049	21	22	27	57	42	45	0	0	0	0	0	0
chr1	40039049	40041049	356	429	349	632	725	656	1	1	1	1	1	1
chr1	40041049	40043329	1456	1978	1341	2038	2346	1861	1	1	1	1	1	1
chr1	40062669	40065620	225	197	261	314	304	353	1	1	1	1	1	1
chr1	40071373	40072873	55	38	40	149	157	127	1	0	0	1	1	1
chr1	40104571	40106114	55	84	80	95	166	91	1	1	1	1	1	1
chr1	40131775	40133840	44	50	55	79	81	114	0	0	0	0	0	1
chr1	40135588	40136594	0	0	1	66	73	35	0	0	0	1	1	1
chr1	40136594	40138823	61	178	96	666	947	549	1	1	1	1	1	1
chr1	40156320	40157982	36	83	74	103	150	119	1	1	1	1	1	1
chr1	40192426	40194642	23	57	39	217	262	183	0	0	0	1	1	1
chr1	40203688	40206586	721	920	659	961	1088	936	1	1	1	1	1	1
chr1	40235642	40237458	56	115	74	89	88	69	1	1	1	1	1	1
chr1	40240814	40242946	34	41	42	87	110	108	0	0	0	1	1	1
chr1	40252937	40254012	2	2	1	23	54	31	0	0	0	0	1	1
chr1	40254012	40256141	264	412	331	461	581	444	1	1	1	1	1	1
chr1	40264327	40265932	166	252	193	124	120	95	1	1	1	1	1	1
chr1	40282269	40283766	110	192	129	139	148	107	1	1	1	1	1	1
chr1	40342540	40345274	164	183	159	95	89	113	1	1	1	0	0	1
chr1	40346872	40348011	99	99	77	49	51	54	1	1	1	1	1	1
chr1	40348011	40349957	1261	1463	1142	1231	1223	1164	1	1	1	1	1	1
chr1	40365973	40368871	743	1062	753	877	1050	793	1	1	1	1	1	1
chr1	40419821	40422059	1174	1498	977	1423	1494	1406	1	1	1	1	1	1
chr1	40422059	40424434	137	200	111	310	412	316	0	1	0	1	1	1
chr1	40425082	40427211	45	51	76	35	71	75	0	0	1	0	1	1
chr1	40460981	40462333	28	26	51	16	19	34	0	0	1	0	0	0
chr1	40468089	40470461	113	93	163	100	83	169	1	0	1	0	0	1
chr1	40504097	40506939	1875	2453	1897	2307	2253	2062	1	1	1	1	1	1
chr1	40506939	40508939	909	1044	902	997	972	1043	1	1	1	1	1	1
chr1	40508939	40510939	128	103	118	81	68	81	1	1	1	1	1	1
chr1	40510939	40512894	11	11	11	12	13	17	0	0	0	0	0	0
chr1	40516252	40517171	32	23	25	17	9	23	0	0	0	0	0	0
chr1	40523615	40525986	208	164	261	195	173	275	1	1	1	1	1	1
chr1	40525986	40527094	43	33	70	36	28	63	1	1	1	1	0	1
chr1	40529696	40531729	97	82	128	83	60	123	0	0	1	0	0	1
chr1	40561369	40563885	690	889	785	815	837	836	1	1	1	1	1	1
chr1	40617965	40620248	242	209	247	141	108	222	1	1	1	1	1	1
chr1	40626033	40628222	1425	1663	1327	1624	1582	1547	1	1	1	1	1	1
chr1	40628222	40630222	495	511	481	379	389	507	1	1	1	1	1	1
chr1	40630222	40631532	28	24	27	9	4	10	0	0	1	0	0	0
chr1	40650483	40652956	281	313	389	168	153	247	1	1	1	1	1	1
chr1	40652956	40654179	79	52	92	30	14	28	1	1	1	0	0	0
chr1	40684520	40686576	141	121	151	34	35	54	1	1	1	0	0	0
chr1	40697231	40699261	108	77	119	58	63	92	0	0	1	0	0	0
chr1	40721395	40723135	735	660	555	699	534	661	1	1	1	1	1	1
chr1	40723135	40725514	1630	2054	1540	1859	1815	1665	1	1	1	1	1	1
chr1	40776844	40779055	310	349	408	337	421	393	1	1	1	1	1	1
chr1	40779055	40781055	140	183	215	126	164	145	1	1	1	1	1	1
chr1	40781055	40783583	305	669	387	402	633	407	1	1	1	1	1	1
chr1	40809908	40811257	20	21	32	77	70	62	0	0	0	1	1	1
chr1	40838524	40840661	1495	1775	1333	1697	1764	1461	1	1	1	1	1	1
chr1	40840661	40842661	794	726	599	795	688	923	1	1	1	1	1	1
chr1	40842661	40844661	59	68	47	129	134	117	1	0	0	1	1	1
chr1	40844661	40846661	110	138	137	174	180	189	1	1	1	1	1	1
chr1	40846661	40848661	298	222	270	375	363	462	1	1	1	1	1	1
chr1	40848661	40850661	176	177	220	403	471	477	1	1	1	1	1	1
chr1	40850661	40852661	375	379	483	502	493	700	1	1	1	1	1	1
chr1	40852661	40854661	69	97	105	79	127	189	0	0	0	0	0	1
chr1	40854661	40855885	16	11	26	25	35	60	0	0	0	0	0	1
chr1	40861379	40863833	135	97	139	138	137	183	1	0	1	1	1	1
chr1	40864362	40866860	233	216	267	282	286	400	1	1	1	1	1	1
chr1	40866860	40869295	127	136	189	229	282	294	1	1	1	1	1	1
chr1	40914496	40916943	829	981	831	1186	1132	1131	1	1	1	1	1	1
chr1	40916943	40918104	61	50	48	113	106	133	1	1	1	1	1	1
chr1	40941785	40944408	973	1270	889	781	897	731	1	1	1	1	1	1
chr1	40973129	40975837	944	1342	847	930	1013	931	1	1	1	1	1	1
chr1	40996064	40998012	1176	1246	1070	1310	1085	1260	1	1	1	1	1	1
chr1	40998012	40999206	86	67	72	113	85	137	1	1	1	1	1	1
chr1	41130534	41132362	232	310	264	258	291	258	1	1	1	1	1	1
chr1	41133930	41135062	58	97	61	43	49	60	0	1	1	0	0	1
chr1	41155981	41158538	1851	2135	1717	2210	2070	1937	1	1	1	1	1	1
chr1	41158538	41160538	438	343	350	378	341	507	1	1	1	1	1	1
chr1	41160538	41162654	69	77	112	28	34	31	0	1	1	0	0	0
chr1	41163058	41164184	15	15	31	15	16	25	0	0	1	0	0	0
chr1	41164184	41166485	121	97	135	192	172	236	1	1	1	1	1	1
chr1	41166872	41169393	97	98	120	91	88	117	1	1	1	1	1	1
chr1	41173619	41176180	1272	1110	1111	1100	797	1073	1	1	1	1	1	1
chr1	41176180	41178180	713	589	594	577	544	611	1	1	1	1	1	1
chr1	41178180	41179633	80	69	141	103	103	133	1	1	1	1	1	1
chr1	41218017	41219259	44	37	38	28	27	45	0	0	0	0	0	1
chr1	41227229	41229651	57	90	151	65	92	132	0	0	1	0	1	1
chr1	41229651	41230829	38	46	69	32	21	45	1	1	1	0	0	1
chr1	41248715	41251001	332	525	334	109	135	116	1	1	1	1	1	1
chr1	41267059	41268918	103	164	147	98	113	111	1	1	1	1	1	1
chr1	41283368	41285009	94	163	111	97	168	113	1	1	1	1	1	1
chr1	41326539	41329057	244	500	359	298	450	365	1	1	1	1	1	1
chr1	41444082	41446963	1668	2175	1654	1855	1905	1786	1	1	1	1	1	1
chr1	41446963	41448963	69	60	54	65	48	84	0	0	0	0	0	0
chr1	41448963	41450602	2	1	4	7	1	5	0	0	0	0	0	0
chr1	41703329	41704556	25	12	12	7	12	12	0	0	0	0	0	0
chr1	41704556	41706556	131	68	102	98	64	122	1	0	1	1	0	1
chr1	41706556	41709539	1636	2051	1512	1882	1992	1690	1	1	1	1	1	1
chr1	41826025	41828319	316	443	340	285	359	290	1	1	1	1	1	1
chr1	41831302	41832982	147	220	124	66	106	118	1	1	1	1	1	1
chr1	41847338	41848691	25	45	44	24	34	36	0	1	1	0	0	1
chr1	41951627	41954169	77	80	62	159	231	205	0	0	0	1	1	1
chr1	41961099	41962903	98	285	194	68	99	105	1	1	1	1	1	1
chr1	41981705	41982895	31	63	41	38	59	42	0	1	1	0	1	1
chr1	42087980	42089898	77	80	85	93	101	148	0	0	0	0	1	1
chr1	42104264	42106409	15	22	21	112	128	142	0	0	0	0	1	1
chr1	42125613	42126689	70	74	61	39	52	78	1	1	1	1	1	1
chr1	42126689	42129219	864	1283	937	819	1038	955	1	1	1	1	1	1
chr1	42138541	42140156	92	118	141	108	81	104	0	1	1	1	1	1
chr1	42186042	42187570	67	92	102	83	71	106	0	1	1	1	1	1
chr1	42191678	42194724	188	209	244	161	190	239	1	1	1	0	1	1
chr1	42203879	42206095	207	263	247	143	187	262	1	1	1	1	1	1
chr1	42206095	42207226	26	20	48	10	18	21	0	0	1	0	0	1
chr1	42215568	42218995	274	259	322	196	162	259	1	1	1	1	1	1
chr1	42265587	42266645	46	53	42	42	49	52	0	0	0	0	0	0
chr1	42268192	42269349	45	43	69	50	41	59	0	0	1	0	0	0
chr1	42269349	42271349	49	46	76	31	53	65	0	0	1	0	0	0
chr1	42271349	42273444	100	140	128	127	145	199	1	1	1	1	1	1
chr1	42356279	42358475	393	417	459	197	192	274	1	1	1	1	1	1
chr1	42382717	42384618	329	508	477	92	155	189	1	1	1	1	1	1
chr1	42384618	42386611	371	458	460	163	189	189	1	1	1	1	1	1
chr1	42420639	42422054	26	14	42	15	11	44	0	0	0	0	0	1
chr1	42479332	42480694	28	36	64	12	15	32	0	0	1	0	0	1
chr1	42499674	42502675	1030	1281	909	689	869	725	1	1	1	1	1	1
chr1	42723729	42725247	69	53	65	45	27	71	1	0	1	0	0	1
chr1	42725247	42727477	98	106	135	63	62	118	1	0	1	0	0	1
chr1	42797525	42799385	229	172	151	175	143	223	1	1	1	1	1	1
chr1	42799385	42801385	1610	1965	1388	1667	1728	1510	1	1	1	1	1	1
chr1	42801385	42802541	433	438	356	400	381	408	1	1	1	1	1	1
chr1	42845453	42847648	237	426	330	196	272	253	1	1	1	1	1	1
chr1	42920618	42924030	1548	2078	1591	1903	1935	1670	1	1	1	1	1	1
chr1	42927863	42929958	380	430	372	261	302	309	1	1	1	1	1	1
chr1	42994912	42995974	30	27	36	23	25	40	0	0	0	0	0	1
chr1	43122839	43125882	1222	1449	1157	1374	1386	1291	1	1	1	1	1	1
chr1	43126284	43127807	36	20	23	36	34	39	0	0	0	0	0	0
chr1	43145760	43148620	1998	2080	1719	2173	1997	1879	1	1	1	1	1	1
chr1	43148620	43150620	1238	1411	1113	1481	1396	1552	1	1	1	1	1	1
chr1	43150620	43152620	294	237	229	228	218	308	1	1	1	1	1	1
chr1	43152620	43154620	48	37	41	40	34	61	0	0	0	0	0	1
chr1	43154620	43156620	72	72	74	62	44	74	1	1	0	0	0	0
chr1	43156620	43157696	38	28	31	24	14	28	1	1	0	0	0	0
chr1	43230177	43232134	755	1010	665	671	710	654	1	1	1	1	1	1
chr1	43232134	43235003	1721	2135	1524	1832	1976	1642	1	1	1	1	1	1
chr1	43281409	43284084	786	1041	843	857	821	866	1	1	1	1	1	1
chr1	43310545	43313415	1681	1769	1442	1873	1649	1621	1	1	1	1	1	1
chr1	43313415	43314692	74	83	75	138	119	173	1	1	1	1	1	1
chr1	43388560	43391529	958	990	799	824	945	848	1	1	1	1	1	1
chr1	43396429	43398952	179	161	218	149	184	224	1	1	1	1	1	1
chr1	43410103	43411911	62	62	78	112	121	157	0	0	1	1	1	1
chr1	43414789	43416128	37	30	55	21	29	42	0	0	1	0	0	0
chr1	43417056	43419525	71	72	111	71	103	80	0	0	1	0	1	0
chr1	43420233	43421234	26	30	33	27	37	25	1	1	1	1	1	1
chr1	43421234	43423234	658	902	715	815	861	816	1	1	1	1	1	1
chr1	43423234	43426058	1567	2042	1424	1892	1942	1629	1	1	1	1	1	1
chr1	43533584	43534623	12	51	34	7	18	21	0	1	0	0	0	0
chr1	43613078	43614063	21	40	20	13	24	24	0	1	0	0	0	0
chr1	43635804	43639016	1087	1418	1036	1294	1194	1105	1	1	1	1	1	1
chr1	43663705	43666226	186	208	124	769	619	643	1	1	1	1	1	1
chr1	43666226	43667236	14	19	7	55	46	40	0	0	0	1	1	1
chr1	43668240	43669492	8	19	6	87	92	91	0	0	0	1	1	1
chr1	43669492	43671492	67	49	51	358	268	284	0	0	0	1	1	1
chr1	43671492	43673204	21	16	22	34	28	35	0	0	0	0	0	0
chr1	43686347	43688080	76	59	97	75	77	99	0	0	0	0	0	1
chr1	43736017	43737013	7	14	11	11	26	19	0	0	0	0	0	0
chr1	43760511	43762237	54	37	51	51	59	81	1	0	0	0	0	1
chr1	43765907	43767556	8	23	18	19	27	26	0	0	0	0	0	0
chr1	43813795	43816295	269	404	370	8	10	18	1	1	1	0	0	0
chr1	43822978	43825140	1245	1529	1136	1309	1283	1128	1	1	1	1	1	1
chr1	43825140	43827997	438	529	446	567	625	634	1	1	1	1	1	1
chr1	43831274	43834182	1670	2194	1539	2004	1946	1757	1	1	1	1	1	1
chr1	43834182	43835523	465	534	493	309	325	347	1	1	1	1	1	1
chr1	43853280	43854711	102	125	106	82	101	98	1	1	1	1	1	1
chr1	43854711	43857334	1734	2063	1579	1872	1706	1623	1	1	1	1	1	1
chr1	43918407	43921177	388	624	446	379	527	423	1	1	1	1	1	1
chr1	43995900	43997942	144	245	135	94	154	150	1	1	1	1	1	1
chr1	44015617	44016349	11	27	22	15	19	18	0	1	0	0	0	0
chr1	44030990	44032080	25	54	36	16	41	30	0	1	1	0	1	1
chr1	44114385	44115430	424	490	433	381	424	362	1	1	1	1	1	1
chr1	44115430	44117430	1449	1503	1187	1479	1356	1206	1	1	1	1	1	1
chr1	44117430	44120409	136	121	103	71	65	65	0	0	0	0	0	0
chr1	44171180	44172640	412	476	358	474	357	414	1	1	1	1	1	1
chr1	44172640	44175131	1531	1857	1304	1686	1684	1517	1	1	1	1	1	1
chr1	44234361	44236086	103	65	76	61	46	104	1	0	1	0	0	1
chr1	44296538	44298703	143	114	181	51	45	89	1	1	1	0	0	1
chr1	44298703	44300703	121	114	148	34	27	60	1	1	1	0	0	1
chr1	44300703	44303044	97	102	165	62	77	113	0	1	1	0	0	1
chr1	44318280	44320026	46	40	70	47	50	91	0	0	0	0	0	1
chr1	44398536	44400984	111	150	94	28	61	50	1	1	1	0	1	0
chr1	44400984	44402914	168	291	206	83	142	108	1	1	1	1	1	1
chr1	44410350	44413025	1204	1492	1215	1457	1476	1400	1	1	1	1	1	1
chr1	44413025	44414346	194	330	192	340	411	353	1	1	1	1	1	1
chr1	44434921	44437248	731	902	626	834	853	791	1	1	1	1	1	1
chr1	44439445	44442495	1437	1817	1391	1540	1758	1426	1	1	1	1	1	1
chr1	44443716	44447020	911	1229	823	973	1201	949	1	1	1	1	1	1
chr1	44456328	44458684	414	623	422	458	506	394	1	1	1	1	1	1
chr1	44494676	44497854	825	1275	971	1031	1226	858	1	1	1	1	1	1
chr1	44532602	44535134	72	72	113	67	55	98	1	0	1	0	0	1
chr1	44677534	44680451	1202	1338	1140	1440	1349	1322	1	1	1	1	1	1
chr1	44819611	44821930	706	872	611	698	836	658	1	1	1	1	1	1
chr1	44870367	44873121	125	215	109	108	159	116	1	1	1	1	1	1
chr1	44938032	44939224	34	48	38	9	18	18	1	1	1	0	0	0
chr1	45096495	45099379	1149	1377	1130	1451	1422	1281	1	1	1	1	1	1
chr1	45129754	45131295	58	64	87	55	49	79	0	0	1	0	0	0
chr1	45136908	45139055	123	130	164	80	67	65	1	1	1	1	0	0
chr1	45139055	45141055	1126	1284	1060	1150	1151	1047	1	1	1	1	1	1
chr1	45141055	45143452	236	224	242	176	130	195	1	1	1	1	1	1
chr1	45177837	45180163	149	143	215	107	102	151	1	1	1	1	1	1
chr1	45186566	45188610	48	56	57	68	68	73	0	1	1	0	0	1
chr1	45188610	45190744	262	386	391	80	97	147	1	1	1	0	0	1
chr1	45195004	45196330	51	67	58	54	69	77	1	0	1	1	1	1
chr1	45196330	45198003	135	138	133	162	173	158	1	0	1	1	1	1
chr1	45204065	45206734	1570	1776	1600	1801	1600	1788	1	1	1	1	1	1
chr1	45206734	45208734	27	35	38	51	58	48	0	0	0	0	0	0
chr1	45208734	45209747	5	8	6	4	5	3	0	0	0	0	0	0
chr1	45239691	45241995	1943	2453	1731	2247	2254	2068	1	1	1	1	1	1
chr1	45241995	45243995	1152	1295	988	1386	1301	1311	1	1	1	1	1	1
chr1	45243995	45245328	60	72	63	53	50	48	1	1	1	1	1	1
chr1	45248886	45250825	466	717	507	164	207	173	1	1	1	1	1	1
chr1	45250825	45252867	175	276	246	133	209	172	1	1	1	1	1	1
chr1	45264795	45267381	1251	1637	1120	1363	1539	1221	1	1	1	1	1	1
chr1	45267381	45269151	421	377	287	301	336	254	1	1	1	1	1	1
chr1	45272162	45274076	66	75	97	101	98	108	0	0	1	1	1	1
chr1	45274076	45276076	105	96	129	115	120	128	0	0	1	1	1	1
chr1	45276076	45277151	46	24	27	24	43	39	0	0	0	0	1	1
chr1	45278822	45280810	279	342	336	351	369	409	1	1	1	1	1	1
chr1	45284099	45286795	369	535	471	441	534	475	1	1	1	1	1	1
chr1	45308132	45309575	100	182	123	71	95	77	1	1	1	1	1	1
chr1	45412381	45413526	33	41	50	11	11	11	0	0	1	0	0	0
chr1	45450593	45453179	926	1043	868	1062	1072	930	1	1	1	1	1	1
chr1	45475415	45477820	836	1206	818	946	1125	968	1	1	1	1	1	1
chr1	45477820	45479496	815	819	718	814	799	746	1	1	1	1	1	1
chr1	45516251	45518080	87	82	149	75	55	108	1	0	1	1	0	1
chr1	45518080	45519757	96	79	118	92	96	135	1	0	1	1	1	1
chr1	45670915	45673420	409	646	451	395	550	496	1	1	1	1	1	1
chr1	45768164	45770987	1247	1379	1154	1288	1270	1171	1	1	1	1	1	1
chr1	45770987	45773307	197	214	221	149	161	150	1	1	1	1	1	1
chr1	45786188	45787856	198	212	283	82	46	57	1	1	1	1	0	1
chr1	45787856	45788982	40	33	54	34	30	32	0	1	1	0	0	0
chr1	45791659	45793816	779	1116	873	720	747	655	1	1	1	1	1	1
chr1	45793816	45795107	174	141	181	124	82	115	1	1	1	1	1	1
chr1	45803897	45804997	223	272	284	295	275	274	1	1	1	1	1	1
chr1	45804997	45807994	2087	2307	1977	2434	2287	2213	1	1	1	1	1	1
chr1	45826517	45827672	55	42	56	39	41	55	1	0	1	0	0	1
chr1	45835687	45837796	72	57	92	73	49	94	0	0	0	0	0	1
chr1	45840848	45842304	46	45	78	54	28	51	0	0	1	1	0	1
chr1	45858532	45861155	205	176	240	216	172	285	1	1	1	1	1	1
chr1	45938158	45939637	45	43	52	42	57	69	0	0	0	0	1	1
chr1	45954331	45955605	121	137	132	193	181	204	1	1	1	1	1	1
chr1	45955605	45958041	955	1406	1106	1243	1337	1211	1	1	1	1	1	1
chr1	45964217	45967634	1270	1438	1199	1499	1565	1431	1	1	1	1	1	1
chr1	45982081	45984256	71	76	93	15	17	13	1	1	1	0	0	0
chr1	45984256	45986256	373	513	441	456	428	489	1	1	1	1	1	1
chr1	45986256	45988872	1615	2104	1553	2048	2185	1901	1	1	1	1	1	1
chr1	46008537	46010108	101	68	108	108	104	156	1	0	1	1	1	1
chr1	46010108	46012164	116	103	128	141	116	146	1	0	1	1	1	1
chr1	46015380	46017859	1679	1889	1653	1914	1662	1684	1	1	1	1	1	1
chr1	46017859	46018906	99	109	66	105	113	116	1	1	1	1	1	1
chr1	46047426	46048439	32	32	35	105	81	122	1	1	1	1	1	1
chr1	46048439	46050439	1617	2024	1438	2105	1980	1847	1	1	1	1	1	1
chr1	46050439	46052439	965	1003	866	1010	895	1048	1	1	1	1	1	1
chr1	46052439	46054690	113	113	109	98	120	136	0	0	0	0	0	0
chr1	46146495	46147521	28	23	18	8	8	9	0	0	0	0	0	0
chr1	46147521	46149521	60	49	46	38	26	30	0	0	0	0	0	0
chr1	46149521	46151521	824	952	769	829	709	796	1	1	1	1	1	1
chr1	46151521	46153521	2422	2585	2250	2760	2455	2342	1	1	1	1	1	1
chr1	46153521	46155951	1705	1720	1426	1873	1625	1722	1	1	1	1	1	1
chr1	46211745	46213405	3	10	6	204	144	194	0	0	0	1	1	1
chr1	46214922	46217600	1000	1239	1074	1062	1181	1061	1	1	1	1	1	1
chr1	46259219	46260640	51	50	37	80	61	88	0	0	0	1	0	1
chr1	46268225	46270760	1155	1368	1059	1363	1255	1201	1	1	1	1	1	1
chr1	46270760	46271966	64	74	65	51	63	66	1	1	1	0	1	1
chr1	46274767	46275845	12	5	5	3	4	3	0	0	0	0	0	0
chr1	46285483	46286717	32	38	24	56	39	46	0	0	0	1	0	1
chr1	46301418	46303530	216	166	248	158	142	191	1	1	1	1	1	1
chr1	46303530	46304594	58	52	85	24	15	38	1	1	1	0	0	1
chr1	46304871	46307400	144	132	152	92	72	132	1	0	1	1	0	1
chr1	46307931	46309660	105	82	66	61	63	89	1	0	0	0	0	1
chr1	46390947	46392604	67	47	69	46	37	66	1	0	1	0	0	0
chr1	46400150	46401381	37	26	25	23	27	49	0	0	0	0	0	1
chr1	46506931	46508030	28	19	27	25	30	45	0	0	1	0	0	1
chr1	46508030	46510396	71	95	117	95	103	116	0	0	1	1	1	1
chr1	46561874	46564372	33	36	28	111	137	146	0	0	0	1	1	1
chr1	46572369	46573931	47	50	54	82	93	100	0	0	0	1	1	1
chr1	46593035	46595031	31	20	18	26	20	17	0	0	0	0	0	0
chr1	46595031	46597031	1049	860	579	805	594	767	1	1	1	1	1	1
chr1	46597031	46599031	1803	1924	1491	2024	1921	1758	1	1	1	1	1	1
chr1	46599031	46601286	500	524	447	517	511	491	1	1	1	1	1	1
chr1	46624675	46626874	158	117	143	105	98	131	1	1	1	1	1	1
chr1	46631597	46633603	206	371	280	223	331	246	1	1	1	1	1	1
chr1	46662800	46665421	747	1100	792	965	1118	983	1	1	1	1	1	1
chr1	46668173	46669676	87	193	111	84	125	109	1	1	1	1	1	1
chr1	46711899	46715308	1236	1339	1277	1497	1389	1390	1	1	1	1	1	1
chr1	46766258	46768578	1185	1723	1129	1048	1236	1084	1	1	1	1	1	1
chr1	46768578	46770578	1680	1960	1536	2054	2063	1854	1	1	1	1	1	1
chr1	46770578	46772578	56	138	112	324	443	313	0	0	0	1	1	1
chr1	46772578	46774757	26	25	31	127	133	111	0	0	0	1	1	1
chr1	46786248	46788488	33	31	34	121	118	158	0	0	0	1	1	1
chr1	46788488	46790488	12	27	28	70	88	87	0	0	0	1	1	1
chr1	46790488	46792488	154	186	205	489	405	538	1	1	1	1	1	1
chr1	46792488	46794488	57	118	98	724	614	614	0	1	1	1	1	1
chr1	46794488	46796488	256	471	342	1814	1643	1486	1	1	1	1	1	1
chr1	46796488	46798488	712	1110	870	2230	1801	1936	1	1	1	1	1	1
chr1	46798488	46800230	49	61	72	260	244	274	0	0	1	1	1	1
chr1	46804640	46808137	1350	1732	1326	1708	1661	1517	1	1	1	1	1	1
chr1	46859308	46860957	9	8	6	101	190	116	0	0	0	1	1	1
chr1	46908117	46909246	40	34	30	53	57	46	1	0	1	1	1	0
chr1	46931774	46933063	71	105	74	42	81	79	1	1	1	1	1	1
chr1	46954860	46956088	21	27	20	18	28	31	0	0	0	0	0	1
chr1	46998361	46999589	45	72	54	31	63	48	0	1	1	0	1	1
chr1	47068540	47071193	1142	1276	1110	1116	1202	1042	1	1	1	1	1	1
chr1	47076970	47078422	2	7	0	5	6	8	0	0	0	0	0	0
chr1	47078657	47081362	107	115	93	91	118	91	1	1	1	0	0	0
chr1	47081362	47083544	964	1143	859	1210	1277	1059	1	1	1	1	1	1
chr1	47132206	47135101	1014	1205	1019	1153	1245	1033	1	1	1	1	1	1
chr1	47182269	47183537	76	60	67	55	40	76	1	1	1	1	1	1
chr1	47183537	47185904	1066	1353	1000	1201	1368	1108	1	1	1	1	1	1
chr1	47644072	47645854	180	208	169	45	64	53	1	1	1	1	1	1
chr1	47696388	47698313	64	87	69	29	53	43	1	1	1	0	0	0
chr1	47776121	47778599	47	42	43	50	42	66	0	0	0	0	0	0
chr1	47778599	47781397	1440	1630	1390	1909	1683	1648	1	1	1	1	1	1
chr1	47798189	47800723	2015	2010	1655	2012	1950	1831	1	1	1	1	1	1
chr1	47800723	47803052	257	212	287	221	200	272	1	0	0	0	0	1
chr1	47803311	47804373	11	9	6	2	7	6	0	0	0	0	0	0
chr1	47882082	47882828	13	25	17	2	5	1	0	1	0	0	0	0
chr1	47897204	47899376	20	25	25	29	27	37	0	0	0	0	0	0
chr1	47899376	47900702	24	36	27	6	16	19	0	0	0	0	0	0
chr1	47901249	47903594	683	967	759	957	996	833	1	1	1	1	1	1
chr1	47903594	47904782	146	222	168	183	296	209	1	1	1	1	1	1
chr1	47910011	47911373	12	27	23	41	56	43	0	0	0	0	1	0
chr1	47973416	47974733	33	53	36	38	58	40	0	0	0	0	1	0
chr1	48936997	48938932	129	144	146	130	172	130	1	1	1	1	1	1
chr1	49241963	49243090	12	29	3	23	38	30	0	0	0	0	1	1
chr1	50798476	50799643	21	57	49	19	54	24	0	1	1	0	1	0
chr1	50884131	50884970	16	37	13	6	9	21	0	1	0	0	0	0
chr1	50886334	50887519	29	54	39	4	8	5	0	1	1	0	0	0
chr1	50888407	50891113	134	195	134	237	335	269	1	1	1	1	1	1
chr1	51188143	51189234	23	20	41	3	4	11	0	0	1	0	0	0
chr1	51189234	51191384	81	54	108	42	22	71	0	0	1	0	0	0
chr1	51338853	51340115	91	79	83	74	68	71	0	0	0	0	0	0
chr1	51381952	51384127	155	134	120	142	129	148	1	1	1	1	1	1
chr1	51420494	51421851	62	33	25	26	23	29	1	0	0	0	0	0
chr1	51423511	51425203	309	315	280	283	263	300	1	1	1	1	1	1
chr1	51425203	51427254	1360	1662	1309	1588	1552	1445	1	1	1	1	1	1
chr1	51432398	51433651	284	267	286	295	245	336	1	1	1	1	1	1
chr1	51433651	51435651	1711	2310	1599	2181	2273	1841	1	1	1	1	1	1
chr1	51435651	51437651	1569	1697	1362	1550	1559	1480	1	1	1	1	1	1
chr1	51437651	51439929	405	555	344	410	430	379	1	1	1	1	1	1
chr1	51441025	51442411	122	135	110	266	233	226	1	1	1	1	1	1
chr1	51442411	51444411	1738	2365	1731	2202	2296	1999	1	1	1	1	1	1
chr1	51444411	51446411	994	1037	860	1042	931	1017	1	1	1	1	1	1
chr1	51446411	51448411	196	252	133	199	220	199	1	1	1	1	1	1
chr1	51448411	51450411	38	34	16	88	85	67	0	0	0	1	1	1
chr1	51450411	51451658	18	22	11	70	78	77	0	0	0	1	1	1
chr1	51453614	51455391	31	37	23	80	99	99	0	0	0	0	1	1
chr1	51464959	51466799	67	36	77	40	34	68	0	0	1	0	0	1
chr1	51622002	51623386	58	60	72	23	29	44	0	1	1	0	0	0
chr1	51699143	51701408	280	301	359	266	315	358	1	1	1	1	1	1
chr1	51701408	51703408	1539	1850	1368	1663	1862	1488	1	1	1	1	1	1
chr1	51703408	51705408	174	162	139	72	104	99	1	1	1	0	1	1
chr1	51705408	51707554	36	22	29	18	15	19	0	0	0	0	0	0
chr1	51732493	51735044	244	230	287	137	131	214	1	1	1	1	1	1
chr1	51762221	51763475	87	136	90	110	126	112	1	1	1	1	1	1
chr1	51766805	51769054	8	11	6	42	50	30	0	0	0	0	0	0
chr1	51769054	51770196	17	14	14	67	64	58	0	0	0	0	0	0
chr1	51795412	51797339	141	266	147	133	197	130	1	1	1	1	1	1
chr1	51810063	51811192	52	83	70	31	62	27	1	1	1	0	1	0
chr1	51907541	51909118	98	72	75	37	25	49	1	0	1	0	0	0
chr1	51909118	51911035	63	55	69	34	19	54	0	0	1	0	0	0
chr1	51955515	51957511	182	148	203	203	166	255	1	1	1	1	1	1
chr1	51957511	51959073	67	80	83	102	120	134	1	1	1	1	1	1
chr1	51963675	51965912	79	50	64	107	106	161	1	0	1	1	1	1
chr1	51965912	51967912	323	310	412	392	378	459	1	1	1	1	1	1
chr1	51967912	51969912	126	119	107	137	165	212	1	1	1	1	1	1
chr1	51969912	51971912	388	384	407	452	424	561	1	1	1	1	1	1
chr1	51971912	51973653	145	141	164	200	154	208	1	1	1	1	1	1
chr1	51975157	51977151	82	71	82	63	69	81	0	0	1	0	0	1
chr1	51977151	51979151	166	172	176	148	138	164	1	1	1	1	1	1
chr1	51979151	51981151	644	732	589	659	636	672	1	1	1	1	1	1
chr1	51981151	51983151	722	677	598	652	688	692	1	1	1	1	1	1
chr1	51983151	51986015	1943	2277	1701	2162	2119	1947	1	1	1	1	1	1
chr1	52017059	52018345	18	12	18	28	27	45	0	0	0	0	0	1
chr1	52034121	52037197	272	225	390	280	175	369	1	1	1	1	1	1
chr1	52040928	52042095	20	19	31	40	25	50	0	0	0	0	0	1
chr1	52081942	52084272	816	993	767	695	817	717	1	1	1	1	1	1
chr1	52191208	52192742	146	86	99	96	70	108	1	1	1	1	1	1
chr1	52192742	52194742	285	301	280	299	281	370	1	0	1	1	0	1
chr1	52194742	52196742	1612	1965	1509	1898	1814	1690	1	1	1	1	1	1
chr1	52196742	52199469	193	199	142	183	152	173	1	1	1	1	0	1
chr1	52199724	52202345	95	62	78	31	13	28	1	0	1	0	0	0
chr1	52202345	52203931	87	59	66	37	39	41	1	0	0	0	0	0
chr1	52204158	52205880	78	47	48	48	28	55	1	0	0	0	0	0
chr1	52205880	52207154	71	65	62	61	49	75	1	0	0	0	0	1
chr1	52209339	52211260	111	87	94	83	68	139	1	0	1	0	0	1
chr1	52336678	52338320	13	4	7	18	34	18	0	0	0	0	0	0
chr1	52339527	52341122	15	8	13	14	14	14	0	0	0	0	0	0
chr1	52341122	52343122	137	144	122	145	213	189	1	1	1	1	1	1
chr1	52343122	52345944	1850	2205	1854	2063	1990	1857	1	1	1	1	1	1
chr1	52427818	52429166	48	38	41	39	45	78	1	0	0	0	0	1
chr1	52455173	52457121	100	151	125	76	121	112	1	1	1	1	1	1
chr1	52495443	52498277	549	546	415	416	453	478	1	1	1	1	1	1
chr1	52498277	52500387	1375	1885	1306	1520	1588	1468	1	1	1	1	1	1
chr1	52518956	52520357	263	247	260	202	200	221	1	1	1	1	1	1
chr1	52520357	52522357	2144	2501	2063	2519	2386	2204	1	1	1	1	1	1
chr1	52522357	52524357	657	626	568	559	455	605	1	1	1	1	1	1
chr1	52524357	52525926	31	20	17	10	9	21	0	0	0	0	0	0
chr1	52604504	52606967	244	197	233	94	80	122	1	1	1	1	1	1
chr1	52606967	52608967	1143	1497	1131	876	930	864	1	1	1	1	1	1
chr1	52608967	52609968	80	82	68	23	25	28	1	1	1	0	1	1
chr1	52669835	52671219	32	27	27	17	25	30	0	0	0	0	0	0
chr1	52705542	52706850	39	38	54	12	12	25	0	0	1	0	0	0
chr1	52830010	52832997	1299	1476	1230	1512	1568	1406	1	1	1	1	1	1
chr1	52833430	52834956	77	173	112	103	153	114	1	1	1	1	1	1
chr1	52866946	52869472	658	699	621	889	746	836	1	1	1	1	1	1
chr1	52869472	52871472	2170	2369	1940	2372	2165	2138	1	1	1	1	1	1
chr1	52871472	52872586	52	35	52	33	48	60	1	0	1	1	1	1
chr1	52994269	52996671	119	116	149	144	130	197	1	0	1	1	1	1
chr1	52996671	52998671	108	115	119	240	237	257	1	0	1	1	1	1
chr1	52998671	52999982	31	27	27	81	73	114	1	0	0	1	1	1
chr1	53015341	53017316	199	220	212	228	255	279	1	1	1	1	1	1
chr1	53017316	53019316	1649	1898	1446	1846	1850	1676	1	1	1	1	1	1
chr1	53019316	53020585	361	541	450	349	424	349	1	1	1	1	1	1
chr1	53067018	53069201	653	990	667	715	889	637	1	1	1	1	1	1
chr1	53069201	53070452	49	61	72	72	78	82	1	1	1	1	1	1
chr1	53097921	53099914	181	331	224	243	352	267	1	1	1	1	1	1
chr1	53102083	53104167	161	161	244	173	156	214	1	1	1	1	1	1
chr1	53161451	53162784	31	13	15	26	30	44	0	0	0	0	0	0
chr1	53162784	53164986	1243	1644	1215	1447	1581	1410	1	1	1	1	1	1
chr1	53167960	53169912	228	273	253	263	271	223	1	1	1	1	1	1
chr1	53191033	53193929	902	1204	863	1125	1119	1032	1	1	1	1	1	1
chr1	53307316	53309698	41	109	70	1351	1388	1109	0	1	1	1	1	1
chr1	53309698	53311749	5	11	1	579	527	555	0	0	0	1	1	1
chr1	53325390	53327290	68	49	50	115	100	109	1	0	0	1	1	1
chr1	53332000	53333815	69	38	46	81	56	91	0	0	0	0	0	1
chr1	53382383	53383702	4	3	1	3	1	0	0	0	0	0	0	0
chr1	53386279	53388375	259	386	274	291	384	305	1	1	1	1	1	1
chr1	53392059	53394569	794	1189	828	390	543	485	1	1	1	1	1	1
chr1	53479566	53482350	1153	1064	969	1077	895	1065	1	1	1	1	1	1
chr1	53661531	53664533	1284	1682	1324	1496	1653	1449	1	1	1	1	1	1
chr1	53684764	53687428	1115	1222	1025	1135	1140	1115	1	1	1	1	1	1
chr1	53702221	53705364	1137	1515	1108	1190	1368	1134	1	1	1	1	1	1
chr1	53711724	53712870	14	19	45	12	9	19	0	0	1	0	0	0
chr1	53790356	53792320	503	697	525	655	703	650	1	1	1	1	1	1
chr1	53792320	53794320	1502	2082	1414	1821	1971	1595	1	1	1	1	1	1
chr1	53794320	53795493	22	25	24	41	46	27	0	0	0	1	1	0
chr1	53832370	53834592	375	518	419	300	335	314	1	1	1	1	1	1
chr1	54203747	54205888	193	343	239	197	307	227	1	1	1	1	1	1
chr1	54299380	54300765	90	103	124	99	94	124	1	1	1	1	1	1
chr1	54300765	54302765	492	498	500	488	464	627	1	1	1	1	1	1
chr1	54302765	54305184	1619	1784	1483	1936	1691	1644	1	1	1	1	1	1
chr1	54353948	54356759	1057	1281	984	1132	1128	1112	1	1	1	1	1	1
chr1	54409191	54412137	1259	1524	1247	1553	1585	1397	1	1	1	1	1	1
chr1	54412137	54414919	715	630	558	778	743	723	1	1	1	1	1	1
chr1	54421626	54423092	4	5	4	0	1	2	0	0	0	0	0	0
chr1	54512515	54514012	98	78	94	26	32	42	1	0	0	0	0	0
chr1	54514012	54515898	39	15	25	8	5	19	0	0	0	0	0	0
chr1	54516441	54518474	881	998	711	876	864	786	1	1	1	1	1	1
chr1	54518474	54521131	1758	1936	1487	1898	1695	1655	1	1	1	1	1	1
chr1	54664308	54667019	1471	1762	1381	1706	1692	1523	1	1	1	1	1	1
chr1	54667019	54668433	66	51	66	52	38	70	1	0	1	1	0	1
chr1	54793060	54794170	6	6	8	43	42	33	0	0	0	0	0	0
chr1	54821232	54823086	33	31	30	101	152	102	0	0	0	1	1	1
chr1	54838120	54839802	41	41	44	85	91	90	0	0	0	1	1	1
chr1	54841004	54843772	116	98	129	288	339	359	1	0	1	1	1	1
chr1	54843772	54845235	6	6	10	113	142	108	0	0	0	1	1	1
chr1	54865834	54867841	11	11	6	14	24	21	0	0	0	0	0	0
chr1	54868019	54869400	7	6	5	8	4	6	0	0	0	0	0	0
chr1	54869400	54871400	352	521	312	539	643	466	1	1	1	1	1	1
chr1	54871400	54874274	1255	1550	1040	1388	1436	1142	1	1	1	1	1	1
chr1	54940002	54941231	22	55	25	14	12	12	0	1	0	0	0	0
chr1	54953039	54955686	643	968	631	789	922	739	1	1	1	1	1	1
chr1	55007128	55008874	78	146	112	60	134	96	1	1	1	1	1	1
chr1	55016936	55017530	2	2	1	4	3	0	0	0	0	0	0	0
chr1	55180750	55183082	964	1115	932	1049	965	1047	1	1	1	1	1	1
chr1	55228537	55231385	1198	1431	1109	1172	1163	1026	1	1	1	1	1	1
chr1	55263853	55265794	16	15	8	39	50	39	0	0	0	0	0	0
chr1	55265794	55267993	164	385	240	199	313	222	1	1	1	1	1	1
chr1	55278634	55280234	12	20	8	46	53	36	0	0	0	0	1	0
chr1	55345905	55347651	43	38	44	40	49	52	0	0	0	0	0	0
chr1	55347651	55349651	19	14	19	7	12	24	0	0	0	0	0	0
chr1	55349651	55351651	129	150	127	189	197	169	1	1	1	1	1	1
chr1	55351651	55354296	1590	1969	1433	2085	1983	1794	1	1	1	1	1	1
chr1	55431128	55432558	26	29	17	75	56	63	0	0	0	0	0	1
chr1	55616707	55617914	57	36	41	17	8	30	1	0	1	0	0	0
chr1	55670170	55671548	68	35	35	62	36	41	0	0	0	1	0	0
chr1	55676110	55677756	285	226	269	234	156	239	1	1	1	1	1	1
chr1	55677756	55679756	703	746	676	718	616	695	1	1	1	1	1	1
chr1	55679756	55682553	1936	2566	1748	2226	2386	2010	1	1	1	1	1	1
chr1	55721235	55723276	121	94	144	131	102	162	1	0	1	1	1	1
chr1	55752901	55754585	53	81	83	63	68	80	0	0	1	0	0	1
chr1	55810923	55811572	7	2	2	0	1	0	0	0	0	0	0	0
chr1	56597507	56600577	151	131	96	46	50	85	1	1	1	0	0	1
chr1	56795698	56798001	15	8	4	106	87	120	0	0	0	1	1	1
chr1	56943027	56943950	23	65	22	17	13	25	0	1	0	0	0	0
chr1	56981625	56983438	84	82	119	80	55	117	0	0	1	0	0	1
chr1	56991480	56992644	36	33	53	41	34	56	0	0	0	0	0	1
chr1	57043441	57045969	379	605	319	265	394	390	1	1	1	1	1	1
chr1	57110326	57111628	38	72	51	28	54	51	1	1	1	0	1	1
chr1	57239558	57240359	29	21	32	25	30	39	1	0	1	0	0	0
chr1	58714957	58716454	58	106	72	15	23	39	1	1	1	0	0	1
chr1	58857108	58858827	59	49	90	27	22	35	0	0	1	0	0	0
chr1	58963131	58963970	44	38	41	0	2	12	0	0	1	0	0	0
chr1	59010719	59013378	1185	1258	1058	1089	1161	1066	1	1	1	1	1	1
chr1	59037811	59038895	80	81	60	28	23	53	1	1	1	1	0	1
chr1	59038895	59040895	173	138	169	83	45	90	1	1	1	1	0	1
chr1	59040895	59042895	165	253	134	33	81	58	1	1	1	0	1	1
chr1	59042895	59044334	60	68	62	17	20	36	1	1	1	0	0	0
chr1	59048823	59050306	51	55	70	27	23	36	0	0	1	0	0	0
chr1	59163694	59166527	1255	1485	1141	1308	1288	1297	1	1	1	1	1	1
chr1	59246325	59249172	713	1255	746	1202	1726	1121	1	1	1	1	1	1
chr1	59249172	59251172	1222	1823	1197	1569	1751	1401	1	1	1	1	1	1
chr1	59251172	59252258	83	148	87	159	181	143	1	1	1	1	1	1
chr1	59270983	59272694	13	6	14	66	79	100	0	0	0	0	0	1
chr1	59280245	59283011	588	935	763	716	846	742	1	1	1	1	1	1
chr1	59368258	59370767	435	700	545	441	630	484	1	1	1	1	1	1
chr1	59433234	59435161	95	94	121	105	100	142	0	0	1	0	0	1
chr1	59470658	59472096	33	32	53	49	39	83	0	0	0	0	0	1
chr1	59472828	59474537	65	54	66	83	78	102	0	0	0	0	0	0
chr1	59477941	59480387	180	217	242	243	234	294	1	1	1	1	1	1
chr1	59485298	59487820	135	138	161	191	241	177	1	1	1	1	1	1
chr1	59490849	59493250	103	99	115	138	133	169	0	0	1	1	1	1
chr1	59536735	59537905	28	23	51	17	16	19	0	0	1	0	0	0
chr1	59611364	59613344	246	421	276	256	299	270	1	1	1	1	1	1
chr1	59761198	59764151	892	1206	963	930	1002	980	1	1	1	1	1	1
chr1	59819881	59821977	65	62	65	67	68	90	0	0	0	0	0	1
chr1	60162342	60163890	76	68	85	40	31	53	0	0	1	0	0	0
chr1	60279270	60282077	183	278	194	30	66	131	1	1	1	0	1	1
chr1	60391262	60393148	132	163	147	24	53	56	1	1	1	0	1	1
chr1	60856762	60857674	32	16	24	18	15	31	0	0	0	0	0	1
chr1	61508402	61509360	5	10	9	1	4	3	0	0	0	0	0	0
chr1	61515076	61517751	43	125	80	31	94	70	0	1	1	0	1	1
chr1	61518412	61520463	70	107	44	79	95	76	1	1	1	1	1	1
chr1	61522003	61524037	62	130	92	39	76	61	1	1	1	0	1	1
chr1	61541802	61544819	291	374	295	208	285	273	1	1	1	1	1	1
chr1	61546270	61549144	59	102	92	45	64	72	1	1	1	0	1	1
chr1	61549144	61550599	9	9	18	7	11	20	0	0	0	0	0	0
chr1	61567102	61568354	0	1	0	2	1	0	0	0	0	0	0	0
chr1	61720068	61721786	2	1	2	4	4	4	0	0	0	0	0	0
chr1	61783404	61785569	35	16	17	52	35	53	0	0	0	0	0	0
chr1	61797230	61798885	11	8	14	28	16	30	0	0	0	0	0	0
chr1	62106652	62108079	50	84	63	36	21	32	1	1	1	0	0	0
chr1	62188921	62192163	1601	1939	1575	1603	1693	1669	1	1	1	1	1	1
chr1	62206652	62209557	800	1101	908	544	655	567	1	1	1	1	1	1
chr1	62900491	62901825	651	861	724	706	680	692	1	1	1	1	1	1
chr1	62901825	62903825	1566	2075	1436	1875	1972	1708	1	1	1	1	1	1
chr1	62903825	62905825	931	988	876	891	773	915	1	1	1	1	1	1
chr1	62905825	62908547	100	78	93	80	59	104	0	0	0	0	0	0
chr1	62949973	62951612	140	153	144	69	79	86	1	1	1	1	1	1
chr1	63078245	63079824	104	69	92	68	67	99	0	0	0	1	1	1
chr1	63090299	63091617	63	52	74	30	34	43	1	0	1	0	0	1
chr1	63150812	63151812	12	4	9	8	2	7	0	0	0	0	0	0
chr1	63152193	63153284	217	211	215	169	200	145	1	1	1	1	1	1
chr1	63153284	63155786	1219	1520	1179	1319	1426	1225	1	1	1	1	1	1
chr1	63248322	63251771	1599	1777	1599	1631	1421	1505	1	1	1	1	1	1
chr1	63265204	63267717	216	202	255	55	69	124	1	1	1	0	0	1
chr1	63275191	63277604	146	119	177	65	39	128	1	0	1	0	0	1
chr1	63782234	63784307	211	335	211	319	417	330	1	1	1	1	1	1
chr1	63785013	63786157	7	3	6	9	31	18	0	0	0	0	0	0
chr1	63787133	63789012	158	243	148	376	498	395	1	1	1	1	1	1
chr1	63789012	63790629	55	81	73	84	140	105	1	1	1	1	1	1
chr1	63832291	63834854	1006	1229	878	1028	1158	1053	1	1	1	1	1	1
chr1	63986867	63989677	1548	1450	1371	1633	1388	1617	1	1	1	1	1	1
chr1	63989677	63990892	332	282	286	248	260	316	1	1	1	1	1	1
chr1	64028209	64030193	84	56	81	65	49	107	1	0	1	0	0	1
chr1	64057811	64060211	1489	1918	1423	1410	1593	1397	1	1	1	1	1	1
chr1	64060211	64061352	277	356	271	230	245	241	1	1	1	1	1	1
chr1	64238279	64241406	336	540	355	28	38	53	1	1	1	0	0	1
chr1	64293274	64295202	62	59	114	2	3	2	0	0	1	0	0	0
chr1	64689103	64689835	26	15	22	14	18	20	1	0	0	0	0	0
chr1	64935230	64936940	97	161	104	73	141	123	1	1	1	1	1	1
chr1	65209720	65211703	202	312	226	94	173	150	1	1	1	1	1	1
chr1	65418881	65420079	34	20	46	13	12	17	0	0	1	0	0	0
chr1	65421123	65423772	156	178	184	107	106	115	1	1	1	0	0	0
chr1	65425351	65426519	69	48	70	76	67	88	1	1	1	1	1	1
chr1	65426519	65428519	99	92	96	78	88	101	1	1	1	0	1	0
chr1	65428519	65430519	399	349	313	266	240	277	1	1	1	1	1	1
chr1	65430519	65433307	1493	1705	1185	1433	1685	1234	1	1	1	1	1	1
chr1	65467637	65469586	153	261	161	158	288	173	1	1	1	1	1	1
chr1	65531606	65533073	343	502	338	330	456	337	1	1	1	1	1	1
chr1	65533073	65535206	866	1232	893	880	1088	831	1	1	1	1	1	1
chr1	65612223	65615185	1752	2336	1666	1619	1716	1558	1	1	1	1	1	1
chr1	65615185	65616486	217	217	246	157	140	176	1	1	1	1	1	1
chr1	65628026	65629865	99	69	99	79	73	109	1	0	1	1	1	1
chr1	65672304	65673884	71	61	67	53	57	70	1	0	0	0	0	1
chr1	65719088	65721838	447	677	445	628	768	588	1	1	1	1	1	1
chr1	65730156	65732572	218	341	255	178	231	224	1	1	1	1	1	1
chr1	65884495	65885776	340	417	311	289	341	293	1	1	1	1	1	1
chr1	65885776	65887776	1191	1374	1006	1308	1332	1264	1	1	1	1	1	1
chr1	65887776	65889124	12	17	13	8	22	10	0	0	0	0	0	0
chr1	66258332	66259178	25	23	14	4	7	2	1	1	0	0	0	0
chr1	66712456	66714257	2	2	3	18	20	29	0	0	0	0	0	0
chr1	66736755	66738199	75	62	104	31	29	39	0	0	1	0	0	0
chr1	66741414	66742975	78	55	74	66	58	89	0	0	0	0	0	1
chr1	66743166	66745255	119	57	113	104	102	114	1	0	1	0	0	0
chr1	66747103	66750458	371	229	343	287	209	433	1	1	1	1	1	1
chr1	66766089	66767888	138	131	175	108	110	137	1	1	1	1	1	1
chr1	66795285	66797252	136	105	103	62	63	82	1	1	1	0	1	1
chr1	66797252	66799252	1571	1564	1304	1598	1504	1454	1	1	1	1	1	1
chr1	66799252	66801252	1332	1274	1133	1313	1259	1207	1	1	1	1	1	1
chr1	66801252	66803252	557	480	572	547	516	534	1	1	1	1	1	1
chr1	66803252	66805252	75	53	65	42	47	53	0	0	1	0	0	0
chr1	66805252	66807252	231	219	213	157	185	195	1	1	1	0	1	1
chr1	66807252	66809252	65	52	61	75	71	98	0	0	0	0	0	1
chr1	66809252	66811252	47	19	21	15	16	25	0	0	0	0	0	0
chr1	66811252	66813252	64	44	64	39	35	65	0	0	0	0	0	0
chr1	66813252	66815252	143	108	126	81	77	113	1	1	1	0	0	1
chr1	66815252	66817252	231	203	223	203	186	246	1	1	1	1	1	1
chr1	66817252	66818582	59	31	68	38	28	35	0	0	1	0	0	1
chr1	66829837	66831484	57	34	67	42	35	76	0	0	0	0	0	1
chr1	66835521	66836773	33	19	21	55	33	65	0	0	0	1	0	1
chr1	66836773	66838773	95	83	137	113	129	152	1	0	1	1	1	1
chr1	66838773	66840773	202	168	265	205	175	285	1	1	1	1	1	1
chr1	66840773	66841942	69	50	79	51	48	69	1	1	1	1	1	1
chr1	66844666	66845776	32	15	37	20	7	40	0	0	1	0	0	1
chr1	66845776	66847932	169	164	200	175	177	259	1	1	1	1	1	1
chr1	66860542	66861705	44	44	52	24	31	31	1	0	1	0	0	0
chr1	66861705	66864007	166	126	187	154	134	203	1	0	1	1	0	1
chr1	66864936	66866974	88	65	94	108	89	107	0	0	1	1	0	1
chr1	66866974	66869083	80	79	86	86	61	127	0	0	1	1	0	1
chr1	66903920	66905646	117	69	111	86	83	118	1	0	1	1	1	1
chr1	66909606	66912622	422	315	328	292	259	297	1	1	1	1	1	1
chr1	66998807	66999795	23	38	17	7	3	8	0	1	0	0	0	0
chr1	67217456	67218786	47	140	88	12	14	28	1	1	1	0	0	0
chr1	67253340	67255002	101	90	56	29	37	46	1	1	0	0	0	0
chr1	67388894	67390258	304	392	290	404	431	386	1	1	1	1	1	1
chr1	67390258	67392258	1427	1623	1317	1570	1564	1326	1	1	1	1	1	1
chr1	67392258	67393314	56	47	44	45	40	49	1	1	1	1	1	1
chr1	67394583	67397203	1534	1632	1238	1804	1659	1616	1	1	1	1	1	1
chr1	67397203	67399203	951	792	681	731	636	839	1	1	1	1	1	1
chr1	67399203	67401393	461	384	370	218	223	325	1	1	1	1	1	1
chr1	67446621	67448209	113	98	108	50	41	95	1	1	1	0	0	1
chr1	67517442	67518521	85	108	87	103	106	144	1	1	1	1	1	1
chr1	67518521	67520781	1328	1770	1272	1495	1666	1339	1	1	1	1	1	1
chr1	67679408	67681484	97	83	99	108	113	141	1	0	0	0	0	1
chr1	67772344	67774361	413	726	393	70	122	122	1	1	1	1	1	1
chr1	67774361	67775550	82	88	43	6	7	1	1	1	1	0	0	0
chr1	67803579	67806520	142	140	203	70	60	115	1	1	1	0	0	1
chr1	67884346	67885736	6	2	5	5	4	2	0	0	0	0	0	0
chr1	67885736	67887736	11	10	5	9	2	8	0	0	0	0	0	0
chr1	67887736	67888766	7	3	5	3	1	1	0	0	0	0	0	0
chr1	67889053	67890709	14	11	3	6	9	5	0	0	0	0	0	0
chr1	67890709	67892709	168	167	142	103	65	137	1	1	1	1	0	1
chr1	67892709	67894709	1338	1212	938	1033	763	1215	1	1	1	1	1	1
chr1	67894709	67896709	1874	2375	1682	2173	2316	1940	1	1	1	1	1	1
chr1	67896709	67898572	414	455	433	400	396	456	1	1	1	1	1	1
chr1	68149713	68152392	1334	1930	1150	1505	1826	1363	1	1	1	1	1	1
chr1	68152392	68154112	558	422	318	449	323	421	1	1	1	1	1	1
chr1	68201017	68202989	145	153	209	162	160	188	1	1	1	1	1	1
chr1	68297160	68299666	61	107	66	123	196	119	0	1	0	1	1	1
chr1	68515636	68516727	4	2	2	15	19	15	0	0	0	0	0	0
chr1	68696779	68698087	2	4	3	7	5	6	0	0	0	0	0	0
chr1	68959954	68961571	131	110	114	149	95	162	0	0	1	1	0	1
chr1	68961571	68963767	1211	1517	1074	1319	1270	1183	1	1	1	1	1	1
chr1	69171426	69172269	5	5	6	17	17	24	0	0	0	0	0	1
chr1	69786366	69787275	10	7	5	1	1	4	0	0	0	0	0	0
chr1	70667420	70668648	22	16	15	18	14	18	0	0	0	0	0	0
chr1	70668648	70670648	290	305	224	264	225	269	1	1	1	1	1	1
chr1	70670648	70672648	1838	1818	1486	1866	1746	1721	1	1	1	1	1	1
chr1	70672648	70674739	57	52	36	43	59	70	0	0	0	0	0	0
chr1	70686007	70688367	1552	1741	1428	1599	1444	1493	1	1	1	1	1	1
chr1	70688367	70690928	244	283	203	207	230	237	1	1	1	0	1	1
chr1	70817126	70819196	362	432	345	338	313	362	1	1	1	1	1	1
chr1	70819196	70821835	1731	2074	1591	1817	2014	1751	1	1	1	1	1	1
chr1	70875509	70878176	1556	1783	1354	1568	1582	1354	1	1	1	1	1	1
chr1	70878176	70880176	267	249	219	285	289	271	1	1	1	1	1	1
chr1	70880176	70882435	104	63	75	83	59	107	1	0	0	1	0	1
chr1	70982827	70984095	40	39	62	40	26	58	0	0	1	1	0	1
chr1	71512656	71513979	30	69	37	23	20	17	0	1	1	0	0	0
chr1	71543742	71545546	262	205	174	155	170	176	1	1	1	1	1	1
chr1	71545546	71548214	1985	1986	1673	1742	1699	1758	1	1	1	1	1	1
chr1	71958026	71958826	0	0	0	17	16	28	0	0	0	0	0	1
chr1	72747718	72750536	101	198	106	56	109	82	1	1	1	1	1	1
chr1	74662366	74664673	1098	1195	950	1110	1063	1058	1	1	1	1	1	1
chr1	74664673	74665765	102	97	91	40	38	56	1	1	1	1	1	1
chr1	75051573	75052722	36	37	40	22	33	25	1	0	1	0	0	0
chr1	75138387	75140213	82	101	54	26	58	68	1	1	1	0	1	1
chr1	75178824	75181095	109	63	53	65	58	59	1	0	0	0	0	0
chr1	75193949	75196278	77	50	70	43	44	51	1	0	0	0	0	0
chr1	75196278	75198278	350	274	189	175	217	252	1	1	1	1	1	1
chr1	75198278	75200278	1753	1569	1337	1612	1364	1439	1	1	1	1	1	1
chr1	75200278	75202133	139	93	49	51	58	74	1	1	0	0	1	1
chr1	75600371	75602323	9	19	9	72	124	74	0	0	0	1	1	1
chr1	75804006	75805943	94	69	102	49	50	88	1	0	1	0	0	0
chr1	75806438	75807631	49	31	45	40	35	67	0	0	0	0	0	1
chr1	75839767	75842740	619	629	502	535	541	519	1	1	1	1	1	1
chr1	76080223	76082302	79	139	122	43	62	78	1	1	1	0	1	1
chr1	76188984	76191533	1868	1894	1543	1780	1590	1701	1	1	1	1	1	1
chr1	76191533	76194405	1227	1374	1103	942	961	1042	1	1	1	1	1	1
chr1	76210311	76212032	78	49	85	19	20	38	1	0	1	0	0	0
chr1	76249257	76251197	862	764	772	164	160	233	1	1	1	1	1	1
chr1	76251197	76253197	2508	2420	2048	2441	2021	2314	1	1	1	1	1	1
chr1	76253197	76255197	1746	1587	1311	1516	1152	1727	1	1	1	1	1	1
chr1	76255197	76257197	614	470	387	287	236	414	1	1	1	1	1	1
chr1	76257197	76259816	87	78	73	29	20	43	0	0	0	0	0	0
chr1	76539520	76542382	56	126	89	118	207	155	0	1	1	1	1	1
chr1	76619632	76621061	120	141	127	77	101	104	1	1	1	1	1	1
chr1	76890136	76892184	1	4	0	154	101	147	0	0	0	1	1	1
chr1	77332869	77334754	57	110	58	17	37	45	1	1	1	0	0	0
chr1	77682605	77683920	43	25	25	20	10	23	1	0	0	0	0	0
chr1	77683920	77686472	1300	1451	1184	1303	1194	1287	1	1	1	1	1	1
chr1	77747037	77748958	80	178	97	40	96	62	1	1	1	1	1	1
chr1	77878125	77880938	181	155	136	100	72	104	1	1	1	1	0	1
chr1	78048194	78049978	40	48	42	126	111	111	0	0	0	1	1	1
chr1	78136249	78139082	194	137	161	33	27	43	1	0	1	0	0	0
chr1	78143952	78145047	23	8	10	10	5	9	0	0	0	0	0	0
chr1	78145047	78147047	266	190	208	131	141	191	1	1	1	1	1	1
chr1	78147047	78149047	1905	2106	1702	2065	1832	1785	1	1	1	1	1	1
chr1	78149047	78150541	470	514	466	435	477	478	1	1	1	1	1	1
chr1	78152994	78154182	33	52	30	56	55	46	0	1	0	1	1	1
chr1	78220955	78222227	44	23	37	40	33	49	0	0	0	0	0	0
chr1	78222227	78224227	108	129	91	117	129	130	1	1	1	1	1	1
chr1	78224227	78226304	1321	1571	1183	1502	1510	1413	1	1	1	1	1	1
chr1	78235133	78237660	107	112	133	154	145	217	0	0	1	1	1	1
chr1	78244384	78246505	966	1174	874	1059	1100	1080	1	1	1	1	1	1
chr1	78246505	78247614	43	33	35	45	67	46	1	0	1	1	1	1
chr1	78312517	78314006	63	68	95	11	19	30	1	1	1	0	0	0
chr1	78353726	78355616	266	476	338	294	410	344	1	1	1	1	1	1
chr1	78391461	78394513	670	623	647	311	302	406	1	1	1	1	1	1
chr1	78415831	78417626	93	72	95	51	43	84	1	0	0	0	0	1
chr1	78435742	78437322	14	10	14	9	6	11	0	0	0	0	0	0
chr1	78437322	78439322	28	21	27	27	19	19	0	0	0	0	0	0
chr1	78439322	78441322	121	112	94	64	62	75	1	1	1	0	0	0
chr1	78441322	78443322	661	807	621	858	1010	879	1	1	1	1	1	1
chr1	78443322	78445322	2341	2251	1930	2579	2252	2231	1	1	1	1	1	1
chr1	78445322	78447286	974	1073	857	1165	954	1003	1	1	1	1	1	1
chr1	78468563	78469785	76	83	86	47	43	53	1	1	1	1	1	1
chr1	78469785	78471785	1163	927	821	997	825	1039	1	1	1	1	1	1
chr1	78471785	78473785	646	576	486	339	333	395	1	1	1	1	1	1
chr1	78473785	78475975	155	140	101	60	65	64	1	1	1	0	0	0
chr1	78510255	78512997	404	662	471	173	280	283	1	1	1	1	1	1
chr1	78545422	78547377	170	163	199	40	40	69	1	1	1	0	0	1
chr1	78608357	78609739	85	120	151	67	87	83	1	1	1	1	1	1
chr1	79084211	79085662	116	149	115	122	97	151	1	1	1	1	1	1
chr1	79085662	79087662	2285	2053	1801	2219	1767	2182	1	1	1	1	1	1
chr1	79087662	79089662	1692	1368	1163	1555	1317	1470	1	1	1	1	1	1
chr1	79089662	79091662	634	599	420	562	664	716	1	1	1	1	1	1
chr1	79091662	79093662	317	296	172	256	290	300	1	1	1	1	1	1
chr1	79093662	79095662	70	33	30	30	27	54	0	0	0	0	0	1
chr1	79095662	79096750	12	4	7	7	4	6	0	0	0	0	0	0
chr1	79114598	79116754	1409	1300	1078	1220	1021	1242	1	1	1	1	1	1
chr1	79116754	79118754	906	911	686	1090	1178	1093	1	1	1	1	1	1
chr1	79118754	79120754	138	107	65	122	125	139	1	1	1	1	1	1
chr1	79120754	79123343	25	11	12	21	13	20	0	0	0	0	0	0
chr1	79143361	79144754	79	58	68	53	43	62	1	1	1	0	0	1
[truncated: 49,129 more rows]
