# Supplementary material for: MAnorm2 for quantitatively comparing groups of ChIP-seq samples
Source: HighWire-hosted journal article supplement (doi:10.1101/gr.262675.120), 2020-11-18
Supplement: Supplemental_Code.zip [file MAnorm2_utils-manual.pdf › MAnorm2_utils-1.0.0/docs/pdf/MAnorm2_utils-manual.pdf]

# Specification of MAnorm2\_utils

**Author:** Shiqi Tu

**Contact:** [tushiqi@picb.ac.cn](mailto:tushiqi@picb.ac.cn)

**Version:** 1.0.0

**Date:** 2018-08-24

**Abstract:** MAnorm2\_utils is designed to coordinate with **MAnorm2**, an R package for differential analysis with **ChIP-seq** signals between two or more groups of replicate samples. MAnorm2\_utils is primarily used for processing a set of ChIP-seq samples into a regular table recording the read abundances and enrichment states of a list of genomic bins in each of these samples.

**Note:** This document is a fully detailed specification. For a quick experience with MAnorm2\_utils, refer to its [home page](#).

The primary utility of MAnorm2\_utils comes from the two scripts bound with it, named `profile_bins` and `sam2bed`, respectively. This document focuses on detailing the usage of them.

## Contents

- [Profiling ChIP-seq signals in reference genomic regions](#)
  - [Mandatory inputs](#)
  - [Decorating outputs](#)
  - [Deducing reference genomic bins](#)
  - [Counting reads falling within reference genomic bins](#)
  - [Miscellaneous](#)
- [Transforming SAM into BED files](#)

## Profiling ChIP-seq signals in reference genomic regions

Typically, a considerable proportion of the mapped reads of a ChIP-seq sample are dispersed throughout the genome, while the others cluster together constituting reads-enriched genomic regions, termed peaks. Peak regions of a ChIP-seq sample generally represent putative transcription-factor binding sites or enrichments for a certain histone modification. Refer to [MACS](#) for more information about the characteristics of ChIP-seq peaks.

`profile_bins` uses pre-defined peaks of a set of ChIP-seq samples to come up with a list of reference genomic bins (each being enriched for ChIP-seq signals in at least one of the samples). The program also deduces the read abundance as well as enrichment status of each of the reference bins in each sample.

**Note:** We recommend [MACS 1.4](#) for identifying peaks for ChIP-seq samples associated with narrow genomic regions of reads enrichment (e.g., samples for most transcription factors and histone modifications like H3K4me3 and H3K27ac). In fact, although having a general applicability, `profile_bins` is specifically suited to processing the output files generated by MACS 1.4. For histone modifications constituting broad enriched domains (e.g., H3K9me3 and H3K27me3), we recommend [SICER](#) as the peak caller. See [here](#) for more methods for calling peaks on ChIP-seq data.

The following is a sample usage of `profile_bins` of the simplest form:

```
profile_bins --peaks=peak1.bed,peak2.bed \
             --reads=read1.bed,read2.bed \
             --labs=s1,s2 -n example
```

**Note:** `profile_bins` only recognizes [BED-formatted](#) input files. For read alignment results stored in [SAM](#) files, use first `sam2bed` to transform them into BED files before calling `profile_bins` (BED files created by `sam2bed` have been specifically designed to suit `profile_bins`; see also [Transforming SAM into BED files](#) below). For [BAM-formatted](#) files, refer to [Samtools](#) for converting them into SAM files.

If everything goes smoothly, the command above will generate two files, named `example_profile_bins_log.txt` and `example_profile_bins.xls`, respectively. The former records the full list of parameter settings for calling `profile_bins`, as well as some summary statistics regarding each of the supplied ChIP-seq samples. The latter gives the read count and enrichment status for each deduced reference genomic bin in each sample, and has a format like the following (data shown here is only for illustration):

| Example output of <code>profile_bins</code> |        |        |             |             |              |              |
|---------------------------------------------|--------|--------|-------------|-------------|--------------|--------------|
| chrom                                       | start  | end    | s1.read_cnt | s2.read_cnt | s1.occupancy | s2.occupancy |
| chr1                                        | 28112  | 29788  | 115         | 4           | 1            | 0            |
| chr1                                        | 164156 | 166417 | 233         | 194         | 1            | 1            |
| chr1                                        | 166417 | 168417 | 465         | 577         | 1            | 1            |
| chr1                                        | 168417 | 169906 | 15          | 34          | 0            | 1            |

To clarify, a genomic bin is “occupied” by a ChIP-seq sample if and only if its middle point is covered by some peak region of the sample.

`profile_bins` supports a number of parameters for a customized configuration for deducing reference genomic bins as well as counting the reads falling in them. Type `profile_bins --help` in the command line for a complete list of these parameters and a brief description of each of them.

The following subsections classify all the parameters supported by `profile_bins` into different functions, and provide a detailed explanation for each of them.

## Mandatory inputs

Read alignment results and peak regions of each of a set of ChIP-seq samples are required for calling `profile_bins`:

`--peaks=<files>`

[BED](#) files recording peak regions of each ChIP-seq sample. File names should be separated by a comma (a trailing comma is allowed).

The first 3 columns of each BED file are mandatory. The *score* field (i.e., the 5th column of a BED file) may be optionally used to filter peaks (see `--keep-peaks` below).

`--reads=<files>`

[BED](#) files recording read alignments for each ChIP-seq sample. File names

should be separated by a comma (a trailing comma is allowed).

The first 3 columns of each BED file are mandatory. For single-end reads, the *strand* field (i.e., the 6th column of a BED file) is used for shifting downstream the 5' end of each read, and is assumed to be "+" when the field is not available (see **--shiftsize** below). For paired-end reads, both the *name* and *strand* fields are required (the 4th and 6th columns of a BED file, respectively; see **--paired** below).

---

## Decorating outputs

Each call of `profile_bins` generates two files, named *prefix\_profile\_bins\_log.txt* and *prefix\_profile\_bins.xls*, respectively. You may specify the common *prefix* of the two file names and the labels of ChIP-seq samples for creating the header of the latter file:

|                                |                                             |
|--------------------------------|---------------------------------------------|
| <code>-n &lt;string&gt;</code> | Common prefix of the names of output files. |
|--------------------------------|---------------------------------------------|

Default: NA

---

|                                     |                                                                                                                                                     |
|-------------------------------------|-----------------------------------------------------------------------------------------------------------------------------------------------------|
| <code>--labs=&lt;strings&gt;</code> | Labels of the supplied ChIP-seq samples, separated by a comma (a trailing comma is allowed) and used only for writing the header of an output file. |
|-------------------------------------|-----------------------------------------------------------------------------------------------------------------------------------------------------|

Default: s1,s2,...

---

## Deducing reference genomic bins

`profile_bins` comes up with a set of reference genomic bins by merging the peak regions from all the provided ChIP-seq samples and dividing up each *broad* merged peak into consecutive, non-overlapping genomic bins. Several parameters have been designed for customizing this procedure:

|                                       |                                                                                                                                                                                                                                                                                                                                                                                                                        |
|---------------------------------------|------------------------------------------------------------------------------------------------------------------------------------------------------------------------------------------------------------------------------------------------------------------------------------------------------------------------------------------------------------------------------------------------------------------------|
| <code>--keep-peaks=&lt;int&gt;</code> | The maximum number of peaks to keep for each ChIP-seq sample. If set, peaks in each peak file are sorted by their <i>score</i> fields (i.e., the 5th column of a <a href="#">BED</a> file). These fields are considered as numeric values, and for each ChIP-seq sample only the <code>&lt;int&gt;</code> peaks with the <i>greatest</i> scores are retained for the subsequent usage. By default, all peaks are used. |
|---------------------------------------|------------------------------------------------------------------------------------------------------------------------------------------------------------------------------------------------------------------------------------------------------------------------------------------------------------------------------------------------------------------------------------------------------------------------|

Note that this parameter is specifically useful for processing the BED-formatted peak files generated by [MACS 1.4](#), where the score field of each peak represents its statistical significance and is appropriate for ranking peaks.

---

|                                         |                                                                                                                                                                                                                                                                                                        |
|-----------------------------------------|--------------------------------------------------------------------------------------------------------------------------------------------------------------------------------------------------------------------------------------------------------------------------------------------------------|
| <code>--min-peak-gap=&lt;int&gt;</code> | After filtering peak regions (if <b>--keep-peaks</b> is set), peaks of each ChIP-seq sample that are within a distance of <code>&lt;int&gt;</code> base pairs to one another are merged. If <b>--bins</b> is not set, the merged peaks of each sample will be further merged across samples (where the |
|-----------------------------------------|--------------------------------------------------------------------------------------------------------------------------------------------------------------------------------------------------------------------------------------------------------------------------------------------------------|

parameter is used again) to come up with a set of reference genomic bins. The merged peaks of each sample are also used to determine the enrichment status of each reference bin in the sample (see [below](#)).

This parameter defaults to 150, which is approximately the length of DNA wrapping a single nucleosome and, thus, is suited to the ChIP-seq experiments targeting histone modifications.

---

`--summits=<files>`

[BED](#) files recording the summit coordinate of each peak of each ChIP-seq sample. Only the first 3 columns of each BED file are used. File names should be separated by a comma (a trailing comma is allowed) and match the order of peak files as specified by `--peaks`. For each pair of peak and summit files, they may be corresponded line by line (refer to the outputs of [MACS 1.4](#) for a concrete example). By default, the middle point of each peak is taken as its summit.

After merging peak regions from all the supplied ChIP-seq samples, `profile_bins` infers the summit position of each merged peak by using the summits of individual peaks constituting the merged one (see [Figure 1](#) for a diagram about deducing the summit of a merged peak). These inferred summits will be used as the entry points for dividing up “broad” merged peaks into consecutive genomic bins.

---

`--typical-bin-size=<int>`

Each merged peak having a size “comparable” to `<int>` are directly taken as reference bins. Each of the others is divided up into consecutive, non-overlapping genomic bins of `<int>` base pairs (except the bins at the edge of merged peaks; see [Figure 2](#) for a diagram about dividing up merged peaks).

This parameter defaults to 2000, which suits well the ChIP-seq samples of histone modifications. For ChIP-seq samples of transcription factors, setting the parameter to 1000 is recommended.

---

`--bins=<file>`

An optional [BED](#) file specifying directly the set of reference genomic bins. Only the first 3 columns of the file are used. For technical reasons, each bin mustn’t be completely enclosed by another. Note that the process of merging peaks across samples is repressed once `--bins` is specified.

Formally, `--summits`, `--typical-bin-size` and `--fix-bin-size` are ignored if `--bins` is specified.

---

After determining reference genomic bins, `profile_bins` assigns an “occupancy” indicator to each of the bins in each sample (see also the table of [Example output](#) shown above), to assess whether the bin is enriched for ChIP-seq signals in the sample. Formally put it, a reference bin has an occupancy indicator of 1 in

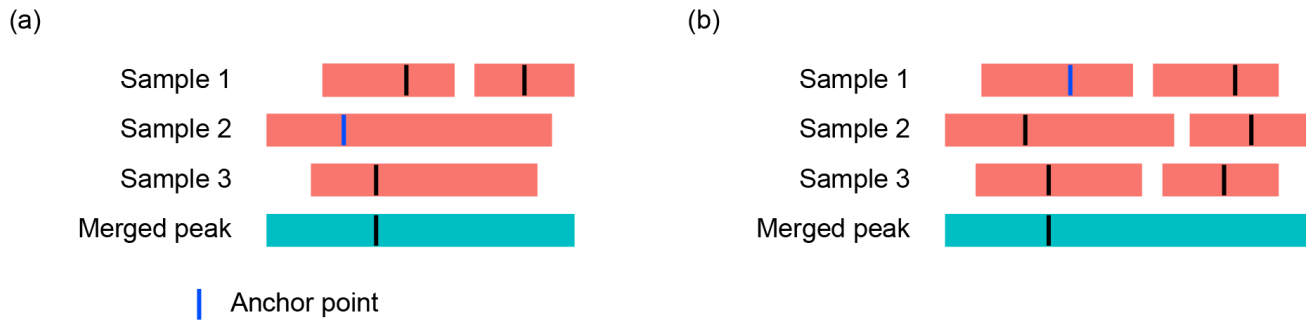

**Figure 1. Deducing the summit of a merged peak.** Boxes represent original peak regions from different ChIP-seq samples and the resulting merged peak. Ticks within boxes mark summits of the original peaks as well as the inferred summit of the merged peak.

For each merged peak, the algorithm takes summits of the involved original peaks, and selects one of them as the *anchor point*. Then, for each ChIP-seq sample involved, it identifies the summit that is closest to the anchor. Finally, the *median* one of these identified summits is considered as the summit of the merged peak. There are two scenarios for deriving the anchor point:

- There exist ChIP-seq samples that contribute only one peak to the merged peak. In this case, the algorithm takes the summits *that come from those samples* (e.g., sample 2 and 3 in the diagram), and selects the median one as the anchor point.
- Each ChIP-seq sample involved contributes at least two peaks to the merged peak. In this case, the algorithm takes summits of *all* the involved peaks, and selects the median one as the anchor point.

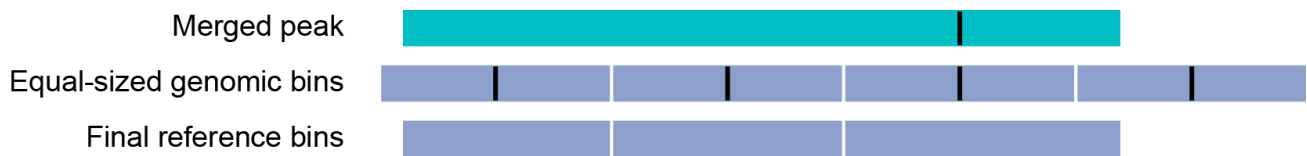

**Figure 2. Default mode for dividing up merged peaks into consecutive genomic bins.** Boxes represent a merged peak and the associated genomic bins. Ticks within boxes mark the *inferred* summit (see Figure 1) of the merged peak as well as centers of bins.

For each merged peak, the algorithm divides it up into consecutive genomic bins by first placing the bin whose center aligns with the inferred summit of the merged peak. It then extends a sequence of equal-sized, non-overlapping genomic bins towards both directions until the whole merged peak is covered. An edge bin is retained and trimmed to the corresponding edge of the merged peak if its center is covered by the merged peak (see the left edge bin); an edge bin is trimmed and absorbed into its predecessor otherwise (see the right one). See also `--fix-bin-size` for an alternative mode for processing edge bins.

a certain ChIP-seq sample if and only if the bin's middle point falls within some peak region belonging to the sample.

Note also that these occupancy indicators are essential to the normalization algorithm implemented in **MAnorm2**.

## Counting reads falling within reference genomic bins

`profile_bins` next counts, for each ChIP-seq sample, the reads that fall within each reference genomic bin. It handles both single-end and paired-end reads, and has made specific efforts to take the full advantage of paired-end samples. Note that each read (or read pair), before being assigned to reference genomic bins, is converted into a genomic locus representing the imputed middle point of the underlying DNA fragment associated with the read (or read pair). Thus, each read (or read pair) would not be assigned simultaneously to two non-overlapping reference bins.

There are several parameters designed for this procedure:

`--shiftsize=<int>`

By default, reads are treated as single-end, and the 5' end of each of them will be shifted `<int>` base pairs downstream to reach the putative center of the underlying DNA fragment. Note that the strand of each read is assumed to be "+" when the corresponding field (i.e., the 6th column of a [BED](#) file) is not available.

This parameter defaults to 100, and may be set to half of the practical DNA fragment size selected in the library preparation process.

---

`--paired`

If set, reads are considered as paired-end. In this case, middle point of the underlying DNA fragment associated with each read pair could be accurately inferred. Note that two reads from the same ChIP-seq sample are considered as a read pair only if they have *exactly the same* name (i.e., the 4th column of a [BED](#) file; see also the [Note below](#)). Besides, a read pair is valid only if the two reads are mapped to the different strands of the same chromatin. Unpaired reads and invalid read pairs, if any, will be ignored with a warning message.

`--shiftsize` is ignored when `--paired` is set.

---

`--keep-dup=all/<int>`

This parameter controls the program's behavior regarding duplicate reads (or read pairs) potentially resulting from PCR amplification. For single-end reads, two reads are considered as duplicates if their 5' ends are mapped to the same genomic locus; for paired-end reads, two read pairs are considered as duplicates if their implied DNA fragments occupy the same genomic interval.

By default (i.e., `--keep-dup=all`), all reads (or read pairs) are preserved for counting; if `--keep-dup` is set to an integer, at most `<int>` reads (or read pairs) of a set of duplicates from the same sample are retained for counting. Note that the output log file records, for each sample, the ratio of reads (or read pairs) that are removed due to `--keep-dup`.

---

`--method=byBin/byRead`

The algorithm to be used for counting reads. Must be either "byBin" or "byRead". In rare cases can using "byRead" be faster than using "byBin".

**Note:** `profile_bins` identifies read pairs from a [BED](#) file by pairing the read names (i.e., the 4th column of the BED file). Formally, two reads are treated as a pair if and only if they have *exactly the same* name. This manner of pairing reads, however, may conflict with some well-known routines for generating BED files from files of other formats. For example, the `bamtobed` utility provided by the [Bedtools](#) suite could convert sequence alignments in [BAM](#) format into BED records. However, if `bamtobed` is used to transform paired-end alignments, name field of each of the resulting BED records will be the corresponding query template name (i.e., the 1st mandatory field of the corresponding BAM record) with a *suffix* of /1 or /2 appended. Roughly speaking, these suffixes are used to indicate whether each read is the 1st or 2nd mate of the read pair it belongs to, and they don't agree with the rule of recognizing read pairs implemented in `profile_bins`.

On this account, the recommended strategy for converting BAM into BED files is to utilize the [Samtools](#) in collaboration with our `sam2bed` script (see also [Transforming SAM into BED files](#) below). For example, you may exploit the following command to achieve the task:

```
samtools view sample.bam | sam2bed -o sample.bed
```

Duplicate reads (or read pairs) could strongly bias the testing results of the following differential analysis. Therefore, for both paired-end reads and deep-sequencing single-end reads (e.g., >25 million), we strongly recommend removing potential duplicates by setting the `--keep-dup` to 1, which could significantly enhance the specificity of various downstream analyses. We also suggest applying the paired-end sequencing technology to the practical design of ChIP-seq experiments, which, compared with single-end sequencing, dramatically improves the accuracy of identifying real PCR duplicates rather than those reads (or read pairs) that are mapped to the same genomic location by chance.

**Caution:** The mechanism by which `profile_bins` recognizes duplicates is highly dependent on the mapping positions of 5' ends of reads. In practice, however, 5' ends of reads are often trimmed in the pre-processing stage for, e.g., removing low-sequencing-quality bases from the alignments with the reference genome. On this account, we strongly emphasize that the length of bases trimmed from 5' ends must remain *constant* for all reads from the same sample, presuming that you want to exploit the duplicates recognition mechanism implemented in `profile_bins`.

## Miscellaneous

Several other parameters have been devised to add to the functionality of `profile_bins` as well as to make it more accessible to users:

`--fix-bin-size`

If set, an alternative mode for dividing up merged peaks into reference genomic bins will be utilized, and all the resulting reference bins will be of the same size (i.e., the `--typical-bin-size`). Note that reference bins may overlap with each other in this mode (see [Figure 3](#) for a detailed illustration of this alternative mode).



This parameter is ignored when `--bins` is specified.

|                                    |                                                                                                                                                                                                                                                                                                                                                                                                                                                                                                                                                                                                                                                                                                                                                                                                                                                                                                                                                                                                       |
|------------------------------------|-------------------------------------------------------------------------------------------------------------------------------------------------------------------------------------------------------------------------------------------------------------------------------------------------------------------------------------------------------------------------------------------------------------------------------------------------------------------------------------------------------------------------------------------------------------------------------------------------------------------------------------------------------------------------------------------------------------------------------------------------------------------------------------------------------------------------------------------------------------------------------------------------------------------------------------------------------------------------------------------------------|
| <code>--filter=&lt;file&gt;</code> | <p>An optional <a href="#">BED</a> file specifying a list of genomic regions to be filtered out from the following analyses. Only the first 3 columns of the file are used. Any reference bin that overlaps with some genomic region belonging to the list is suppressed from the output table. Note that filtering is performed at the last stage of the program, and summary statistics written to the output log file (e.g., for each ChIP-seq sample the ratio of reads or read pairs that fall within reference bins) are calculated with respect to the whole set of reference bins.</p> <p>ChIP-seq experiments often produce artifact signals in certain regions of the genome. In practice, we recommend filtering out a <a href="#">black list of genomic regions</a> that tend to have anomalously excessive reads mapping prior to the downstream differential analysis. Such black lists for various genome assemblies of multiple species could be downloaded <a href="#">here</a>.</p> |
|------------------------------------|-------------------------------------------------------------------------------------------------------------------------------------------------------------------------------------------------------------------------------------------------------------------------------------------------------------------------------------------------------------------------------------------------------------------------------------------------------------------------------------------------------------------------------------------------------------------------------------------------------------------------------------------------------------------------------------------------------------------------------------------------------------------------------------------------------------------------------------------------------------------------------------------------------------------------------------------------------------------------------------------------------|

|                                        |                                                                                                                                                                                                                                                                                                                                                                                                                                                             |
|----------------------------------------|-------------------------------------------------------------------------------------------------------------------------------------------------------------------------------------------------------------------------------------------------------------------------------------------------------------------------------------------------------------------------------------------------------------------------------------------------------------|
| <code>--parameters=&lt;file&gt;</code> | <p>A configuration file specifying the parameters <i>in addition to</i> those provided on the command line. <code>--parameters</code> itself can only be defined on the command line. Each line in <code>&lt;file&gt;</code> defines a parameter, with a format (for both short and long parameters) of “name=value” (with no spaces between them), or “name” alone. In either case, the leading hyphen(s) should <i>not</i> be included in the “name”.</p> |
|----------------------------------------|-------------------------------------------------------------------------------------------------------------------------------------------------------------------------------------------------------------------------------------------------------------------------------------------------------------------------------------------------------------------------------------------------------------------------------------------------------------|

The following is an example configuration file:

```
peaks=peak1.bed,peak2.bed
reads=read1.bed,read2.bed
n=example
labs=s1,s2
summits=summit1.bed,summit2.bed
paired
keep-dup=1
filter=blackList.bed
```

|                           |                                            |
|---------------------------|--------------------------------------------|
| <code>-v/--version</code> | Print the version of the program and exit. |
| <code>-h/--help</code>    | Print a help message and exit.             |

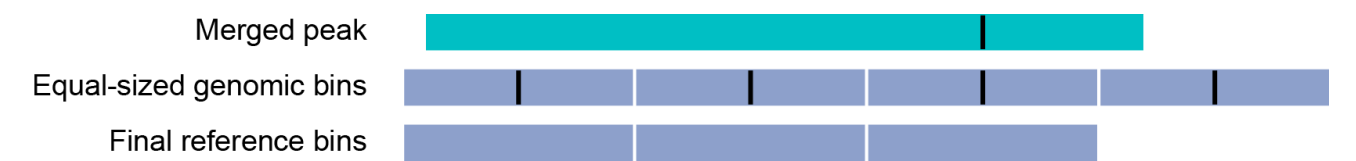

**Figure 3. Alternative mode for dividing up merged peaks into consecutive genomic bins.** Boxes represent a merged peak and the associated genomic bins. Ticks within boxes mark the *inferred* summit (see [Figure 1](#)) of the merged peak as well as centers of bins.

The only difference between this alternative mode and the default mode (see [Figure 2](#)) is in the manner of dealing with edge bins. In this mode, an edge bin is retained (and *not* trimmed) if its center is covered by the merged peak (see the left edge bin); an edge bin is discarded otherwise (see the right one). Notably, edge bins from adjacent merged peaks may overlap with each other in this mode.



**Tip:** Better store all the parameter settings in a configuration file and assign it to `--parameters` when invoking `profile_bins`, especially in the cases where a large number of samples are involved.

**Note:** Syntax of the configuration file for calling `profile_bins` is a bit different from that used in some other applications (e.g., in the `setup.cfg` for distributing and installing Python packages). Particularly, “pure” options (i.e., those without arguments) in our configuration file are specified by `name` alone *rather than* `name=1`.

## Transforming SAM into BED files

`sam2bed` converts `SAM` into `BED` files. It is designed to coordinate with `profile_bins`, since the latter only accepts `BED`-formatted input files. The simplest form of calling `sam2bed` is as follows:

```
sam2bed -i File.sam -o File.bed
```

The program will read from the standard input stream if `-i` is not specified.

For a complete list of parameters supported by `sam2bed`, type `sam2bed --help` in the command line, and you'll see the following:

Description: This program converts a standard SAM file to a BED file.

Usage: `sam2bed -i File.sam -o File.bed [options]`

Input/Output:

`-i <file>` Input SAM file. Default: standard input stream.  
`-o <file>` Output BED file name. Mandatory.

Options:

`--min-qual=<int>` Any mapping records with a mapping quality below `<int>` are ignored. Default: 0

`--retain-secondary` If set, secondary alignments are retained in the output. Default: OFF

`--retain-supplementary` If set, supplementary alignments are retained in the output. Default: OFF

`--suppress-extension` If set, the alignment match section in reference sequence is output for each alignment record. By default, the section is extended to reach the two end points of the read, which is suited to the following identification of duplicate reads, if needed.

`-v/--version` Print the version information and exit.

`-h/--help` Print this help message and exit.

Note: The query template name and mapping quality are taken as the name and score field in the output BED file, respectively.

We expect all the parameters shown above but `--suppress-extension` to be easy to understand. See [Figure 4](#) for a detailed explanation of `--suppress-extension`.

|                    |                               |
|--------------------|-------------------------------|
| Coordinate         | 0123456789012345678901234567  |
| Reference sequence | CTGGGAGAACTTTGTACGTCGAAAACCTC |
| Read1 CIGAR=1S8M   | NACTTTGTA                     |
| Read2 CIGAR=3S6M   | NNNTTTGTA                     |

**Figure 4. Extend the alignment match sections in reference sequence to reach the end points of reads.** Consistent with the *0-based coordinate system*, which is the coordinate system used by [BED](#) files, here the reference sequence starts with a coordinate of 0, and the intervals mentioned below are all left closed and right open. Note that [SAM](#) files utilize a different coordinate system.

Two reads are shown in the diagram, and their 5' ends are both associated with *soft clippings* due to a low sequencing quality (see the [SAM Format Specification](#) for more information about CIGAR string). The alignment matches for these two reads start from 8 and 10, respectively, which correspond to the POS fields of their SAM alignment records. If `--suppress-extension` is set, the interval *exactly* wrapping the alignment matches of each read is written to the output BED file, which is `[8, 16)` and `[10, 16)` for read 1 and 2, respectively. Thus, the two reads will not be treated as duplicates by `profile_bins`, since their 5' end positions are not the same (see also the `--keep-dup` parameter of `profile_bins`). In the default mode, the alignment intervals are extended to reach the end points of reads, and `[7, 16)` will be output for both of the two reads. In this case, if `--keep-dup` is set to 1 when calling `profile_bins`, only one of the two reads will be retained for the counting procedure (see also the section of [Counting reads falling within reference genomic bins](#)).

**Tip:** In the vast majority of cases, the default setting of most of the parameters supported by `sam2bed` should be used. The only parameter that may be customized in practice is the `--min-qual`, which controls the program's behavior regarding filtering out the alignment records with a low mapping quality.
