# Supplementary figures and images for: MAnorm2 for quantitatively comparing groups of ChIP-seq samples
Source: HighWire-hosted journal article supplement (doi:10.1101/gr.262675.120), 2020-11-18

(a)

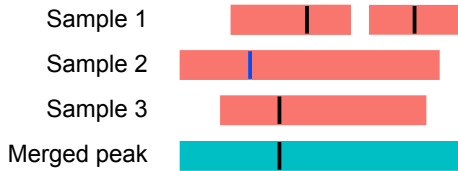

| Anchor point

(b)

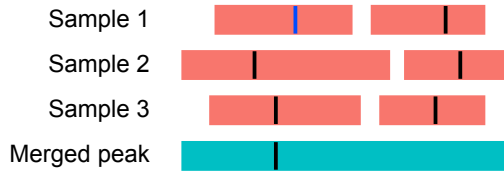

Supplement: Supplemental_Code.zip [file deduce_summits.pdf › MAnorm2_utils-1.0.0/docs/images/deduce_summits.pdf]

Merged peak

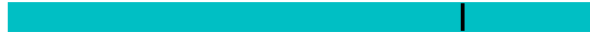

Equal-sized genomic bins

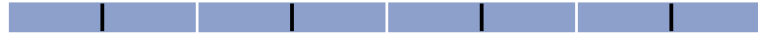

Final reference bins

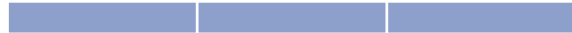

Supplement: Supplemental_Code.zip [file divide_peaks_alternative.pdf › MAnorm2_utils-1.0.0/docs/images/divide_peaks_alternative.pdf]

Merged peak

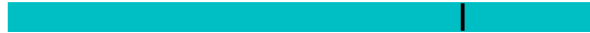

Equal-sized genomic bins

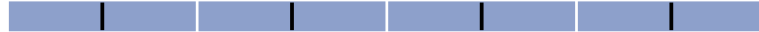

Final reference bins

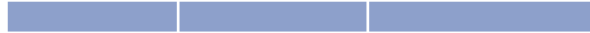

Supplement: Supplemental_Code.zip [file divide_peaks_default.pdf › MAnorm2_utils-1.0.0/docs/images/divide_peaks_default.pdf]
